# Supplementary material for: Emotional dispositions and intracerebral hemorrhage: a Mendelian Randomization insight
Source: Front Genet. 2024 Jun 20;15:1330682. doi: 10.3389/fgene.2024.1330682 (PMC11222637; doi:10.3389/fgene.2024.1330682)
Supplement: Supplementary file 1 [file Table2.XLSX]

## Sheet: Table S2
Table S2 Complete results of MR analysis by using multiple methods
id.exposure	id.outcome	outcome	method	nsnp.x	b	se	pval	egger_intercept	se_intercept	pval_intercept	Q	Q_df	Q_pval	X	trait	ncase	group_name	year	author	consortium	sex	pmid	population	unit	sample_size	build	ncontrol	category	subcategory	ontology	note	mr	nsnp.y	priority	sd	OR	CL	CU	OR95
ukb-b-6519	finn-b-I9_ICH	Intracerebral haemmorrhage || id:finn-b-I9_ICH	Maximum likelihood	195	1.11297	0.469798	0.0178339	0.0164214	0.0128903	0.204221	208.152	193	0.216046	37876	Worrier / anxious feelings	255812	public	2018	Ben Elsworth	MRC-IEU	Males and Females	NA	European	SD	450765	HG19/GRCh37	194953	Binary	NA	NA	1980: Output from GWAS pipeline using Phesant derived variables from UKBiobank	1	9851867	1	NA	3.04339	1.21188	7.6429	3.04 (1.21, 7.64)
ukb-b-6519	finn-b-I9_ICH	Intracerebral haemmorrhage || id:finn-b-I9_ICH	Weighted median	195	0.588318	0.667025	0.377775	0.0164214	0.0128903	0.204221	209.902	194	0.206147	37876	Worrier / anxious feelings	255812	public	2018	Ben Elsworth	MRC-IEU	Males and Females	NA	European	SD	450765	HG19/GRCh37	194953	Binary	NA	NA	1980: Output from GWAS pipeline using Phesant derived variables from UKBiobank	1	9851867	1	NA	1.80096	0.487214	6.65712	1.80 (0.49, 6.66)
ukb-b-6519	finn-b-I9_ICH	Intracerebral haemmorrhage || id:finn-b-I9_ICH	Inverse variance weighted	195	1.09037	0.479251	0.0228966	0.0164214	0.0128903	0.204221	209.902	194	0.206147	37876	Worrier / anxious feelings	255812	public	2018	Ben Elsworth	MRC-IEU	Males and Females	NA	European	SD	450765	HG19/GRCh37	194953	Binary	NA	NA	1980: Output from GWAS pipeline using Phesant derived variables from UKBiobank	1	9851867	1	NA	2.97538	1.16304	7.61183	2.98 (1.16, 7.61)
ukb-b-6519	finn-b-I9_ICH	Intracerebral haemmorrhage || id:finn-b-I9_ICH	IVW radial	195	1.09036	0.479264	0.0229015	0.0164214	0.0128903	0.204221	208.152	193	0.216046	37876	Worrier / anxious feelings	255812	public	2018	Ben Elsworth	MRC-IEU	Males and Females	NA	European	SD	450765	HG19/GRCh37	194953	Binary	NA	NA	1980: Output from GWAS pipeline using Phesant derived variables from UKBiobank	1	9851867	1	NA	2.97535	1.163	7.61194	2.98 (1.16, 7.61)
ukb-b-6519	finn-b-I9_ICH	Intracerebral haemmorrhage || id:finn-b-I9_ICH	MR PRESSO	195	1.09037	0.479251	0.02399	0.0164214	0.0128903	0.204221	209.902	194	0.206147	37876	Worrier / anxious feelings	255812	public	2018	Ben Elsworth	MRC-IEU	Males and Females	NA	European	SD	450765	HG19/GRCh37	194953	Binary	NA	NA	1980: Output from GWAS pipeline using Phesant derived variables from UKBiobank	1	9851867	1	NA	2.97538	1.16304	7.61183	2.98 (1.16, 7.61)
ukb-b-20544	finn-b-I9_ICH	Intracerebral haemmorrhage || id:finn-b-I9_ICH	Maximum likelihood	162	-0.384461	0.603831	0.524318	0.0161613	0.0127703	0.207521	162.265	160	0.435156	39504	Nervous feelings	106635	public	2018	Ben Elsworth	MRC-IEU	Males and Females	NA	European	SD	450700	HG19/GRCh37	344065	Binary	NA	NA	1970: Output from GWAS pipeline using Phesant derived variables from UKBiobank	1	9851867	1	NA	0.680817	0.208468	2.22342	0.68 (0.21, 2.22)
ukb-b-20544	finn-b-I9_ICH	Intracerebral haemmorrhage || id:finn-b-I9_ICH	Weighted median	162	-0.173461	0.88347	0.844343	0.0161613	0.0127703	0.207521	163.889	161	0.421848	39504	Nervous feelings	106635	public	2018	Ben Elsworth	MRC-IEU	Males and Females	NA	European	SD	450700	HG19/GRCh37	344065	Binary	NA	NA	1970: Output from GWAS pipeline using Phesant derived variables from UKBiobank	1	9851867	1	NA	0.84075	0.148813	4.74998	0.84 (0.15, 4.75)
ukb-b-20544	finn-b-I9_ICH	Intracerebral haemmorrhage || id:finn-b-I9_ICH	Inverse variance weighted	162	-0.379754	0.597746	0.525226	0.0161613	0.0127703	0.207521	163.889	161	0.421848	39504	Nervous feelings	106635	public	2018	Ben Elsworth	MRC-IEU	Males and Females	NA	European	SD	450700	HG19/GRCh37	344065	Binary	NA	NA	1970: Output from GWAS pipeline using Phesant derived variables from UKBiobank	1	9851867	1	NA	0.68403	0.211965	2.20743	0.68 (0.21, 2.21)
ukb-b-20544	finn-b-I9_ICH	Intracerebral haemmorrhage || id:finn-b-I9_ICH	IVW radial	162	-0.379765	0.597746	0.525215	0.0161613	0.0127703	0.207521	162.265	160	0.435156	39504	Nervous feelings	106635	public	2018	Ben Elsworth	MRC-IEU	Males and Females	NA	European	SD	450700	HG19/GRCh37	344065	Binary	NA	NA	1970: Output from GWAS pipeline using Phesant derived variables from UKBiobank	1	9851867	1	NA	0.684022	0.211962	2.2074	0.68 (0.21, 2.21)
ukb-b-20544	finn-b-I9_ICH	Intracerebral haemmorrhage || id:finn-b-I9_ICH	MR PRESSO	162	-0.379754	0.597746	0.526128	0.0161613	0.0127703	0.207521	163.889	161	0.421848	39504	Nervous feelings	106635	public	2018	Ben Elsworth	MRC-IEU	Males and Females	NA	European	SD	450700	HG19/GRCh37	344065	Binary	NA	NA	1970: Output from GWAS pipeline using Phesant derived variables from UKBiobank	1	9851867	1	NA	0.68403	0.211965	2.20743	0.68 (0.21, 2.21)
ukb-b-9981	finn-b-I9_ICH	Intracerebral haemmorrhage || id:finn-b-I9_ICH	Maximum likelihood	147	0.186712	0.557087	0.737506	0.0203364	0.0160967	0.208476	175.996	145	0.0406591	3236	Sensitivity / hurt feelings	249799	public	2018	Ben Elsworth	MRC-IEU	Males and Females	NA	European	SD	449419	HG19/GRCh37	199620	Binary	NA	NA	1950: Output from GWAS pipeline using Phesant derived variables from UKBiobank	1	9851867	1	NA	1.20528	0.404469	3.59162	1.21 (0.40, 3.59)
ukb-b-9981	finn-b-I9_ICH	Intracerebral haemmorrhage || id:finn-b-I9_ICH	Weighted median	147	0.165767	0.827361	0.841202	0.0203364	0.0160967	0.208476	177.934	146	0.0370486	3236	Sensitivity / hurt feelings	249799	public	2018	Ben Elsworth	MRC-IEU	Males and Females	NA	European	SD	449419	HG19/GRCh37	199620	Binary	NA	NA	1950: Output from GWAS pipeline using Phesant derived variables from UKBiobank	1	9851867	1	NA	1.1803	0.2332	5.97387	1.18 (0.23, 5.97)
ukb-b-9981	finn-b-I9_ICH	Intracerebral haemmorrhage || id:finn-b-I9_ICH	Inverse variance weighted	147	0.181089	0.601477	0.763358	0.0203364	0.0160967	0.208476	177.934	146	0.0370486	3236	Sensitivity / hurt feelings	249799	public	2018	Ben Elsworth	MRC-IEU	Males and Females	NA	European	SD	449419	HG19/GRCh37	199620	Binary	NA	NA	1950: Output from GWAS pipeline using Phesant derived variables from UKBiobank	1	9851867	1	NA	1.19852	0.368688	3.89613	1.20 (0.37, 3.90)
ukb-b-9981	finn-b-I9_ICH	Intracerebral haemmorrhage || id:finn-b-I9_ICH	IVW radial	147	0.181087	0.601477	0.76336	0.0203364	0.0160967	0.208476	175.996	145	0.0406591	3236	Sensitivity / hurt feelings	249799	public	2018	Ben Elsworth	MRC-IEU	Males and Females	NA	European	SD	449419	HG19/GRCh37	199620	Binary	NA	NA	1950: Output from GWAS pipeline using Phesant derived variables from UKBiobank	1	9851867	1	NA	1.19852	0.368687	3.89612	1.20 (0.37, 3.90)
ukb-b-9981	finn-b-I9_ICH	Intracerebral haemmorrhage || id:finn-b-I9_ICH	MR PRESSO	147	0.181089	0.601477	0.763786	0.0203364	0.0160967	0.208476	177.934	146	0.0370486	3236	Sensitivity / hurt feelings	249799	public	2018	Ben Elsworth	MRC-IEU	Males and Females	NA	European	SD	449419	HG19/GRCh37	199620	Binary	NA	NA	1950: Output from GWAS pipeline using Phesant derived variables from UKBiobank	1	9851867	1	NA	1.19852	0.368688	3.89613	1.20 (0.37, 3.90)
ukb-b-10093	finn-b-I9_ICH	Intracerebral haemmorrhage || id:finn-b-I9_ICH	Maximum likelihood	140	0.377843	0.732924	0.606184	0.0187432	0.0153786	0.225006	161.958	138	0.0798958	12227	Tense / 'highly strung'	78408	public	2018	Ben Elsworth	MRC-IEU	Males and Females	NA	European	SD	447961	HG19/GRCh37	369553	Binary	NA	NA	1990: Output from GWAS pipeline using Phesant derived variables from UKBiobank	1	9851867	1	NA	1.45913	0.34691	6.13724	1.46 (0.35, 6.14)
ukb-b-10093	finn-b-I9_ICH	Intracerebral haemmorrhage || id:finn-b-I9_ICH	Weighted median	140	0.614258	1.08633	0.571774	0.0187432	0.0153786	0.225006	163.701	139	0.0747563	12227	Tense / 'highly strung'	78408	public	2018	Ben Elsworth	MRC-IEU	Males and Females	NA	European	SD	447961	HG19/GRCh37	369553	Binary	NA	NA	1990: Output from GWAS pipeline using Phesant derived variables from UKBiobank	1	9851867	1	NA	1.84828	0.219817	15.5409	1.85 (0.22, 15.54)
ukb-b-10093	finn-b-I9_ICH	Intracerebral haemmorrhage || id:finn-b-I9_ICH	Inverse variance weighted	140	0.369634	0.777849	0.634645	0.0187432	0.0153786	0.225006	163.701	139	0.0747563	12227	Tense / 'highly strung'	78408	public	2018	Ben Elsworth	MRC-IEU	Males and Females	NA	European	SD	447961	HG19/GRCh37	369553	Binary	NA	NA	1990: Output from GWAS pipeline using Phesant derived variables from UKBiobank	1	9851867	1	NA	1.4472	0.315073	6.64735	1.45 (0.32, 6.65)
ukb-b-10093	finn-b-I9_ICH	Intracerebral haemmorrhage || id:finn-b-I9_ICH	IVW radial	140	0.369631	0.777851	0.634648	0.0187432	0.0153786	0.225006	161.958	138	0.0798958	12227	Tense / 'highly strung'	78408	public	2018	Ben Elsworth	MRC-IEU	Males and Females	NA	European	SD	447961	HG19/GRCh37	369553	Binary	NA	NA	1990: Output from GWAS pipeline using Phesant derived variables from UKBiobank	1	9851867	1	NA	1.4472	0.315071	6.64735	1.45 (0.32, 6.65)
ukb-b-10093	finn-b-I9_ICH	Intracerebral haemmorrhage || id:finn-b-I9_ICH	MR PRESSO	140	0.369634	0.777849	0.63539	0.0187432	0.0153786	0.225006	163.701	139	0.0747563	12227	Tense / 'highly strung'	78408	public	2018	Ben Elsworth	MRC-IEU	Males and Females	NA	European	SD	447961	HG19/GRCh37	369553	Binary	NA	NA	1990: Output from GWAS pipeline using Phesant derived variables from UKBiobank	1	9851867	1	NA	1.4472	0.315073	6.64735	1.45 (0.32, 6.65)
ukb-b-4062	finn-b-I9_ICH	Intracerebral haemmorrhage || id:finn-b-I9_ICH	Maximum likelihood	45	0.0867308	0.425998	0.83867	0.00509417	0.0174134	0.771278	34.1796	43	0.829448	6627	Happiness	NA	public	2018	Ben Elsworth	MRC-IEU	Males and Females	NA	European	SD	152348	HG19/GRCh37	NA	Categorical Ordered	NA	NA	4526: Output from GWAS pipeline using Phesant derived variables from UKBiobank	1	9851867	1	NA	1.0906	0.473206	2.51353	1.09 (0.47, 2.51)
ukb-b-4062	finn-b-I9_ICH	Intracerebral haemmorrhage || id:finn-b-I9_ICH	Weighted median	45	0.0252975	0.563312	0.96418	0.00509417	0.0174134	0.771278	34.2652	44	0.853928	6627	Happiness	NA	public	2018	Ben Elsworth	MRC-IEU	Males and Females	NA	European	SD	152348	HG19/GRCh37	NA	Categorical Ordered	NA	NA	4526: Output from GWAS pipeline using Phesant derived variables from UKBiobank	1	9851867	1	NA	1.02562	0.340006	3.09376	1.03 (0.34, 3.09)
ukb-b-4062	finn-b-I9_ICH	Intracerebral haemmorrhage || id:finn-b-I9_ICH	Inverse variance weighted	45	0.0840002	0.418756	0.841015	0.00509417	0.0174134	0.771278	34.2652	44	0.853928	6627	Happiness	NA	public	2018	Ben Elsworth	MRC-IEU	Males and Females	NA	European	SD	152348	HG19/GRCh37	NA	Categorical Ordered	NA	NA	4526: Output from GWAS pipeline using Phesant derived variables from UKBiobank	1	9851867	1	NA	1.08763	0.478662	2.47134	1.09 (0.48, 2.47)
ukb-b-4062	finn-b-I9_ICH	Intracerebral haemmorrhage || id:finn-b-I9_ICH	IVW radial	45	0.0840017	0.369541	0.82018	0.00509417	0.0174134	0.771278	34.1796	43	0.829448	6627	Happiness	NA	public	2018	Ben Elsworth	MRC-IEU	Males and Females	NA	European	SD	152348	HG19/GRCh37	NA	Categorical Ordered	NA	NA	4526: Output from GWAS pipeline using Phesant derived variables from UKBiobank	1	9851867	1	NA	1.08763	0.527135	2.2441	1.09 (0.53, 2.24)
ukb-b-4062	finn-b-I9_ICH	Intracerebral haemmorrhage || id:finn-b-I9_ICH	MR PRESSO	45	0.0840002	0.36954	0.821235	0.00509417	0.0174134	0.771278	34.2652	44	0.853928	6627	Happiness	NA	public	2018	Ben Elsworth	MRC-IEU	Males and Females	NA	European	SD	152348	HG19/GRCh37	NA	Categorical Ordered	NA	NA	4526: Output from GWAS pipeline using Phesant derived variables from UKBiobank	1	9851867	1	NA	1.08763	0.527136	2.24409	1.09 (0.53, 2.24)
