# Supplementary material for: Emotional dispositions and intracerebral hemorrhage: a Mendelian Randomization insight
Source: Front Genet. 2024 Jun 20;15:1330682. doi: 10.3389/fgene.2024.1330682 (PMC11222637; doi:10.3389/fgene.2024.1330682)
Supplement: Supplementary file 2 [file Table1.XLSX]

## Sheet: Table S1
Table S1 Selected instrumental variables from different exposures
trait	SNP	effect_allele.exposure	other_allele.exposure	effect_allele.outcome	other_allele.outcome	beta.exposure	beta.outcome	eaf.exposure	eaf.outcome	remove	palindromic	ambiguous	id.outcome	chr	pos	se.outcome	samplesize.outcome	pval.outcome	outcome	originalname.outcome	outcome.deprecated	mr_keep.outcome	data_source.outcome	proxy.outcome	target_snp.outcome	proxy_snp.outcome	target_a1.outcome	target_a2.outcome	proxy_a1.outcome	proxy_a2.outcome	chr.exposure	pos.exposure	pval.exposure	samplesize.exposure	se.exposure	id.exposure	mr_keep.exposure	pval_origin.exposure	data_source.exposure	action	mr_keep
Worrier / anxious feelings	rs1002656	T	C	T	C	-0.00543978	-0.0299	0.70622	0.6852	FALSE	FALSE	FALSE	finn-b-I9_ICH	1	37192741	0.0379	NA	0.4302	Intracerebral haemmorrhage || id:finn-b-I9_ICH	Intracerebral haemmorrhage	Intracerebral haemmorrhage || ||	TRUE	igd	NA	NA	NA	NA	NA	NA	NA	1	37192741	1.40001e-06	450765	0.00112902	ukb-b-6519	TRUE	reported	igd	2	TRUE
Worrier / anxious feelings	rs1004366	C	A	C	A	0.00692742	0.0399	0.227174	0.2155	FALSE	FALSE	FALSE	finn-b-I9_ICH	2	168640233	0.043	NA	0.354	Intracerebral haemmorrhage || id:finn-b-I9_ICH	Intracerebral haemmorrhage	Intracerebral haemmorrhage || ||	TRUE	igd	NA	NA	NA	NA	NA	NA	NA	2	168640233	2e-08	450765	0.00123458	ukb-b-6519	TRUE	reported	igd	2	TRUE
Worrier / anxious feelings	rs10107098	A	G	A	G	-0.00548646	-0.0224	0.595387	0.6071	FALSE	FALSE	FALSE	finn-b-I9_ICH	8	10290314	0.0369	NA	0.5429	Intracerebral haemmorrhage || id:finn-b-I9_ICH	Intracerebral haemmorrhage	Intracerebral haemmorrhage || ||	TRUE	igd	NA	NA	NA	NA	NA	NA	NA	8	10290314	2.1e-07	450765	0.00105735	ukb-b-6519	TRUE	reported	igd	2	TRUE
Worrier / anxious feelings	rs10170005	T	C	T	C	-0.00609004	0.0097	0.299721	0.2396	FALSE	FALSE	FALSE	finn-b-I9_ICH	2	215446947	0.0414	NA	0.8146	Intracerebral haemmorrhage || id:finn-b-I9_ICH	Intracerebral haemmorrhage	Intracerebral haemmorrhage || ||	TRUE	igd	NA	NA	NA	NA	NA	NA	NA	2	215446947	6.49995e-08	450765	0.00112702	ukb-b-6519	TRUE	reported	igd	2	TRUE
Worrier / anxious feelings	rs10179969	G	A	G	A	0.00623172	0.0229	0.275443	0.2457	FALSE	FALSE	FALSE	finn-b-I9_ICH	2	210351805	0.041	NA	0.575999	Intracerebral haemmorrhage || id:finn-b-I9_ICH	Intracerebral haemmorrhage	Intracerebral haemmorrhage || ||	TRUE	igd	NA	NA	NA	NA	NA	NA	NA	2	210351805	5.80003e-08	450765	0.00114899	ukb-b-6519	TRUE	reported	igd	2	TRUE
Worrier / anxious feelings	rs10249502	C	T	C	T	0.00783022	0.0131	0.123899	0.09504	FALSE	FALSE	FALSE	finn-b-I9_ICH	7	67592680	0.0602	NA	0.8281	Intracerebral haemmorrhage || id:finn-b-I9_ICH	Intracerebral haemmorrhage	Intracerebral haemmorrhage || ||	TRUE	igd	NA	NA	NA	NA	NA	NA	NA	7	67592680	7.69999e-07	450765	0.00158427	ukb-b-6519	TRUE	reported	igd	2	TRUE
Worrier / anxious feelings	rs1030090	T	C	T	C	-0.00563506	-0.0445	0.28031	0.1996	FALSE	FALSE	FALSE	finn-b-I9_ICH	2	56439314	0.0443	NA	0.3151	Intracerebral haemmorrhage || id:finn-b-I9_ICH	Intracerebral haemmorrhage	Intracerebral haemmorrhage || ||	TRUE	igd	NA	NA	NA	NA	NA	NA	NA	2	56439314	8.30004e-07	450765	0.00114338	ukb-b-6519	TRUE	reported	igd	2	TRUE
Worrier / anxious feelings	rs1032500	T	C	T	C	-0.00504815	-0.0276	0.320448	0.2554	FALSE	FALSE	FALSE	finn-b-I9_ICH	3	23240658	0.0404	NA	0.4957	Intracerebral haemmorrhage || id:finn-b-I9_ICH	Intracerebral haemmorrhage	Intracerebral haemmorrhage || ||	TRUE	igd	NA	NA	NA	NA	NA	NA	NA	3	23240658	4.49997e-06	450765	0.00110031	ukb-b-6519	TRUE	reported	igd	2	TRUE
Worrier / anxious feelings	rs10496746	T	C	T	C	-0.00595281	-0.001	0.6942	0.5995	FALSE	FALSE	FALSE	finn-b-I9_ICH	2	137207082	0.036	NA	0.9788	Intracerebral haemmorrhage || id:finn-b-I9_ICH	Intracerebral haemmorrhage	Intracerebral haemmorrhage || ||	TRUE	igd	NA	NA	NA	NA	NA	NA	NA	2	137207082	9.90011e-08	450765	0.00111703	ukb-b-6519	TRUE	reported	igd	2	TRUE
Worrier / anxious feelings	rs10497655	C	T	C	T	-0.00540982	-0.0954	0.319378	0.3898	FALSE	FALSE	FALSE	finn-b-I9_ICH	2	185462041	0.0361	NA	0.00829602	Intracerebral haemmorrhage || id:finn-b-I9_ICH	Intracerebral haemmorrhage	Intracerebral haemmorrhage || ||	TRUE	igd	NA	NA	NA	NA	NA	NA	NA	2	185462041	8.30004e-07	450765	0.00109751	ukb-b-6519	TRUE	reported	igd	2	TRUE
Worrier / anxious feelings	rs10507274	C	T	C	T	0.0106828	-0.0085	0.063989	0.04106	FALSE	FALSE	FALSE	finn-b-I9_ICH	12	117160976	0.0898	NA	0.9242	Intracerebral haemmorrhage || id:finn-b-I9_ICH	Intracerebral haemmorrhage	Intracerebral haemmorrhage || ||	TRUE	igd	NA	NA	NA	NA	NA	NA	NA	12	117160976	3.29997e-07	450765	0.00209357	ukb-b-6519	TRUE	reported	igd	2	TRUE
Worrier / anxious feelings	rs10750898	G	A	G	A	0.00528583	-0.0176	0.622551	0.6583	FALSE	FALSE	FALSE	finn-b-I9_ICH	11	58121869	0.0378	NA	0.640301	Intracerebral haemmorrhage || id:finn-b-I9_ICH	Intracerebral haemmorrhage	Intracerebral haemmorrhage || ||	TRUE	igd	NA	NA	NA	NA	NA	NA	NA	11	58121869	5.69994e-07	450765	0.00105713	ukb-b-6519	TRUE	reported	igd	2	TRUE
Worrier / anxious feelings	rs1077393	G	A	G	A	0.00776452	-0.019	0.477066	0.3872	FALSE	FALSE	FALSE	finn-b-I9_ICH	6	31610529	0.0363	NA	0.6016	Intracerebral haemmorrhage || id:finn-b-I9_ICH	Intracerebral haemmorrhage	Intracerebral haemmorrhage || ||	TRUE	igd	NA	NA	NA	NA	NA	NA	NA	6	31610529	3.69999e-14	450765	0.00102571	ukb-b-6519	TRUE	reported	igd	2	TRUE
Worrier / anxious feelings	rs10778609	C	A	C	A	0.00572263	-0.0526	0.256325	0.2424	FALSE	FALSE	FALSE	finn-b-I9_ICH	12	108545985	0.0414	NA	0.2046	Intracerebral haemmorrhage || id:finn-b-I9_ICH	Intracerebral haemmorrhage	Intracerebral haemmorrhage || ||	TRUE	igd	NA	NA	NA	NA	NA	NA	NA	12	108545985	1.09999e-06	450765	0.00117502	ukb-b-6519	TRUE	reported	igd	2	TRUE
Worrier / anxious feelings	rs10781235	T	C	T	C	-0.00650613	0.0149	0.221252	0.2185	FALSE	FALSE	FALSE	finn-b-I9_ICH	9	77159715	0.0425	NA	0.725499	Intracerebral haemmorrhage || id:finn-b-I9_ICH	Intracerebral haemmorrhage	Intracerebral haemmorrhage || ||	TRUE	igd	NA	NA	NA	NA	NA	NA	NA	9	77159715	1.7e-07	450765	0.0012443	ukb-b-6519	TRUE	reported	igd	2	TRUE
Worrier / anxious feelings	rs10784646	A	G	A	G	-0.0051484	0.0369	0.496449	0.5647	FALSE	FALSE	FALSE	finn-b-I9_ICH	12	68119321	0.0355	NA	0.2987	Intracerebral haemmorrhage || id:finn-b-I9_ICH	Intracerebral haemmorrhage	Intracerebral haemmorrhage || ||	TRUE	igd	NA	NA	NA	NA	NA	NA	NA	12	68119321	6.1e-07	450765	0.00103239	ukb-b-6519	TRUE	reported	igd	2	TRUE
Worrier / anxious feelings	rs10845840	C	T	C	T	0.00511758	-0.0071	0.569908	0.6378	FALSE	FALSE	FALSE	finn-b-I9_ICH	12	13930857	0.0368	NA	0.8468	Intracerebral haemmorrhage || id:finn-b-I9_ICH	Intracerebral haemmorrhage	Intracerebral haemmorrhage || ||	TRUE	igd	NA	NA	NA	NA	NA	NA	NA	12	13930857	8.99995e-07	450765	0.00104195	ukb-b-6519	TRUE	reported	igd	2	TRUE
Worrier / anxious feelings	rs10896636	G	C	G	C	0.00642837	0.0022	0.344284	0.387	FALSE	TRUE	FALSE	finn-b-I9_ICH	11	57448032	0.036	NA	0.9522	Intracerebral haemmorrhage || id:finn-b-I9_ICH	Intracerebral haemmorrhage	Intracerebral haemmorrhage || ||	TRUE	igd	NA	NA	NA	NA	NA	NA	NA	11	57448032	2.99999e-09	450765	0.00108386	ukb-b-6519	TRUE	reported	igd	2	TRUE
Worrier / anxious feelings	rs10959797	A	G	A	G	-0.00779753	-0.0152	0.216515	0.1649	FALSE	FALSE	FALSE	finn-b-I9_ICH	9	11431990	0.0475	NA	0.7488	Intracerebral haemmorrhage || id:finn-b-I9_ICH	Intracerebral haemmorrhage	Intracerebral haemmorrhage || ||	TRUE	igd	NA	NA	NA	NA	NA	NA	NA	9	11431990	4e-10	450765	0.00124709	ukb-b-6519	TRUE	reported	igd	2	TRUE
Worrier / anxious feelings	rs10968658	C	A	C	A	0.00489707	0.0119	0.630155	0.5949	FALSE	FALSE	FALSE	finn-b-I9_ICH	9	28574474	0.0359	NA	0.740099	Intracerebral haemmorrhage || id:finn-b-I9_ICH	Intracerebral haemmorrhage	Intracerebral haemmorrhage || ||	TRUE	igd	NA	NA	NA	NA	NA	NA	NA	9	28574474	4.20001e-06	450765	0.00106461	ukb-b-6519	TRUE	reported	igd	2	TRUE
Worrier / anxious feelings	rs11042575	C	T	C	T	0.00482725	-0.0204	0.555406	0.5325	FALSE	FALSE	FALSE	finn-b-I9_ICH	11	9995399	0.0353	NA	0.563101	Intracerebral haemmorrhage || id:finn-b-I9_ICH	Intracerebral haemmorrhage	Intracerebral haemmorrhage || ||	TRUE	igd	NA	NA	NA	NA	NA	NA	NA	11	9995399	2.90001e-06	450765	0.00103264	ukb-b-6519	TRUE	reported	igd	2	TRUE
Worrier / anxious feelings	rs11067376	G	A	G	A	0.00732746	0.0016	0.359672	0.3078	FALSE	FALSE	FALSE	finn-b-I9_ICH	12	110027795	0.038	NA	0.9662	Intracerebral haemmorrhage || id:finn-b-I9_ICH	Intracerebral haemmorrhage	Intracerebral haemmorrhage || ||	TRUE	igd	NA	NA	NA	NA	NA	NA	NA	12	110027795	7.10068e-12	450765	0.00106892	ukb-b-6519	TRUE	reported	igd	2	TRUE
Worrier / anxious feelings	rs11068906	T	C	T	C	0.00745741	-0.0427	0.159001	0.1773	FALSE	FALSE	FALSE	finn-b-I9_ICH	12	118752903	0.0461	NA	0.3543	Intracerebral haemmorrhage || id:finn-b-I9_ICH	Intracerebral haemmorrhage	Intracerebral haemmorrhage || ||	TRUE	igd	NA	NA	NA	NA	NA	NA	NA	12	118752903	1.09999e-07	450765	0.00140411	ukb-b-6519	TRUE	reported	igd	2	TRUE
Worrier / anxious feelings	rs11069798	C	T	C	T	0.00550425	-0.002	0.270404	0.2155	FALSE	FALSE	FALSE	finn-b-I9_ICH	13	110360444	0.0426	NA	0.9625	Intracerebral haemmorrhage || id:finn-b-I9_ICH	Intracerebral haemmorrhage	Intracerebral haemmorrhage || ||	TRUE	igd	NA	NA	NA	NA	NA	NA	NA	13	110360444	1.89998e-06	450765	0.00115585	ukb-b-6519	TRUE	reported	igd	2	TRUE
Worrier / anxious feelings	rs1109344	A	G	A	G	0.00587821	-0.0623	0.506886	0.5309	FALSE	FALSE	FALSE	finn-b-I9_ICH	11	131483597	0.0353	NA	0.0777804	Intracerebral haemmorrhage || id:finn-b-I9_ICH	Intracerebral haemmorrhage	Intracerebral haemmorrhage || ||	TRUE	igd	NA	NA	NA	NA	NA	NA	NA	11	131483597	1.2e-08	450765	0.00103117	ukb-b-6519	TRUE	reported	igd	2	TRUE
Worrier / anxious feelings	rs11249893	T	C	T	C	-0.0111805	0.0109	0.475805	0.5044	FALSE	FALSE	FALSE	finn-b-I9_ICH	8	8700851	0.0656	NA	0.8675	Intracerebral haemmorrhage || id:finn-b-I9_ICH	Intracerebral haemmorrhage	Intracerebral haemmorrhage || ||	TRUE	igd	NA	NA	NA	NA	NA	NA	NA	8	8700851	1.69981e-27	450765	0.00102889	ukb-b-6519	TRUE	reported	igd	2	TRUE
Worrier / anxious feelings	rs112829995	T	C	T	C	0.00651435	0.0852	0.227728	0.2651	FALSE	FALSE	FALSE	finn-b-I9_ICH	17	61528361	0.0398	NA	0.0323497	Intracerebral haemmorrhage || id:finn-b-I9_ICH	Intracerebral haemmorrhage	Intracerebral haemmorrhage || ||	TRUE	igd	NA	NA	NA	NA	NA	NA	NA	17	61528361	1.40001e-07	450765	0.00123868	ukb-b-6519	TRUE	reported	igd	2	TRUE
Worrier / anxious feelings	rs113551339	A	G	A	G	0.0269858	0.2333	0.013261	0.01595	FALSE	FALSE	FALSE	finn-b-I9_ICH	3	87026675	0.1414	NA	0.09909	Intracerebral haemmorrhage || id:finn-b-I9_ICH	Intracerebral haemmorrhage	Intracerebral haemmorrhage || ||	TRUE	igd	NA	NA	NA	NA	NA	NA	NA	3	87026675	1.5e-08	450765	0.00476574	ukb-b-6519	TRUE	reported	igd	2	TRUE
Worrier / anxious feelings	rs114101659	A	C	A	C	-0.0111026	0.1122	0.05135	0.04349	FALSE	FALSE	FALSE	finn-b-I9_ICH	4	66173061	0.0858	NA	0.1913	Intracerebral haemmorrhage || id:finn-b-I9_ICH	Intracerebral haemmorrhage	Intracerebral haemmorrhage || ||	TRUE	igd	NA	NA	NA	NA	NA	NA	NA	4	66173061	2.1e-06	450765	0.00233874	ukb-b-6519	TRUE	reported	igd	2	TRUE
Worrier / anxious feelings	rs114182581	G	T	G	T	-0.0159703	0.0358	0.023941	0.0533	FALSE	FALSE	FALSE	finn-b-I9_ICH	4	92746736	0.0786	NA	0.6489	Intracerebral haemmorrhage || id:finn-b-I9_ICH	Intracerebral haemmorrhage	Intracerebral haemmorrhage || ||	TRUE	igd	NA	NA	NA	NA	NA	NA	NA	4	92746736	4e-06	450765	0.00346433	ukb-b-6519	TRUE	reported	igd	2	TRUE
Worrier / anxious feelings	rs11579246	G	A	G	A	-0.00845464	-0.0023	0.088269	0.1535	FALSE	FALSE	FALSE	finn-b-I9_ICH	1	50559162	0.0487	NA	0.9625	Intracerebral haemmorrhage || id:finn-b-I9_ICH	Intracerebral haemmorrhage	Intracerebral haemmorrhage || ||	TRUE	igd	NA	NA	NA	NA	NA	NA	NA	1	50559162	2.99999e-06	450765	0.00181015	ukb-b-6519	TRUE	reported	igd	2	TRUE
Worrier / anxious feelings	rs11635373	A	G	A	G	0.0048402	0.0584	0.546827	0.6422	FALSE	FALSE	FALSE	finn-b-I9_ICH	15	48071698	0.0367	NA	0.1114	Intracerebral haemmorrhage || id:finn-b-I9_ICH	Intracerebral haemmorrhage	Intracerebral haemmorrhage || ||	TRUE	igd	NA	NA	NA	NA	NA	NA	NA	15	48071698	2.59998e-06	450765	0.00103012	ukb-b-6519	TRUE	reported	igd	2	TRUE
Worrier / anxious feelings	rs11637968	T	C	T	C	-0.00722646	-0.0413	0.170141	0.2041	FALSE	FALSE	FALSE	finn-b-I9_ICH	15	78032245	0.0437	NA	0.3438	Intracerebral haemmorrhage || id:finn-b-I9_ICH	Intracerebral haemmorrhage	Intracerebral haemmorrhage || ||	TRUE	igd	NA	NA	NA	NA	NA	NA	NA	15	78032245	1.29999e-07	450765	0.00136877	ukb-b-6519	TRUE	reported	igd	2	TRUE
Worrier / anxious feelings	rs11682716	G	T	G	T	-0.00619347	0.0209	0.576233	0.5508	FALSE	FALSE	FALSE	finn-b-I9_ICH	2	16075065	0.0354	NA	0.5546	Intracerebral haemmorrhage || id:finn-b-I9_ICH	Intracerebral haemmorrhage	Intracerebral haemmorrhage || ||	TRUE	igd	NA	NA	NA	NA	NA	NA	NA	2	16075065	2.5e-09	450765	0.00103933	ukb-b-6519	TRUE	reported	igd	2	TRUE
Worrier / anxious feelings	rs116962250	A	G	A	G	0.0148696	0.1807	0.039616	0.02475	FALSE	FALSE	FALSE	finn-b-I9_ICH	19	743362	0.1165	NA	0.1207	Intracerebral haemmorrhage || id:finn-b-I9_ICH	Intracerebral haemmorrhage	Intracerebral haemmorrhage || ||	TRUE	igd	NA	NA	NA	NA	NA	NA	NA	19	743362	2.39999e-08	450765	0.00266483	ukb-b-6519	TRUE	reported	igd	2	TRUE
Worrier / anxious feelings	rs11717922	C	T	C	T	-0.00482782	0.0011	0.450435	0.5002	FALSE	FALSE	FALSE	finn-b-I9_ICH	3	54994226	0.0352	NA	0.9743	Intracerebral haemmorrhage || id:finn-b-I9_ICH	Intracerebral haemmorrhage	Intracerebral haemmorrhage || ||	TRUE	igd	NA	NA	NA	NA	NA	NA	NA	3	54994226	4.09996e-06	450765	0.00104854	ukb-b-6519	TRUE	reported	igd	2	TRUE
Worrier / anxious feelings	rs11735465	T	A	T	A	-0.00763465	-0.0107	0.208593	0.1834	FALSE	TRUE	FALSE	finn-b-I9_ICH	4	105007016	0.0457	NA	0.8141	Intracerebral haemmorrhage || id:finn-b-I9_ICH	Intracerebral haemmorrhage	Intracerebral haemmorrhage || ||	TRUE	igd	NA	NA	NA	NA	NA	NA	NA	4	105007016	1.5e-09	450765	0.00126417	ukb-b-6519	TRUE	reported	igd	2	TRUE
Worrier / anxious feelings	rs11751698	T	C	T	C	0.00682505	0.0347	0.139378	0.1427	FALSE	FALSE	FALSE	finn-b-I9_ICH	6	83708583	0.0503	NA	0.4907	Intracerebral haemmorrhage || id:finn-b-I9_ICH	Intracerebral haemmorrhage	Intracerebral haemmorrhage || ||	TRUE	igd	NA	NA	NA	NA	NA	NA	NA	6	83708583	4.20001e-06	450765	0.00148331	ukb-b-6519	TRUE	reported	igd	2	TRUE
Worrier / anxious feelings	rs11753921	C	T	C	T	0.00488524	0.0175	0.402406	0.4711	FALSE	FALSE	FALSE	finn-b-I9_ICH	6	148192962	0.0351	NA	0.6183	Intracerebral haemmorrhage || id:finn-b-I9_ICH	Intracerebral haemmorrhage	Intracerebral haemmorrhage || ||	TRUE	igd	NA	NA	NA	NA	NA	NA	NA	6	148192962	3.09999e-06	450765	0.00104686	ukb-b-6519	TRUE	reported	igd	2	TRUE
Worrier / anxious feelings	rs11787957	A	C	A	C	-0.00640118	-0.011	0.285477	0.3102	FALSE	FALSE	FALSE	finn-b-I9_ICH	9	101356005	0.038	NA	0.772999	Intracerebral haemmorrhage || id:finn-b-I9_ICH	Intracerebral haemmorrhage	Intracerebral haemmorrhage || ||	TRUE	igd	NA	NA	NA	NA	NA	NA	NA	9	101356005	3.2e-08	450765	0.00115758	ukb-b-6519	TRUE	reported	igd	2	TRUE
Worrier / anxious feelings	rs11900407	G	A	G	A	0.00572364	0.0034	0.363741	0.3609	FALSE	FALSE	FALSE	finn-b-I9_ICH	2	17469584	0.0366	NA	0.9257	Intracerebral haemmorrhage || id:finn-b-I9_ICH	Intracerebral haemmorrhage	Intracerebral haemmorrhage || ||	TRUE	igd	NA	NA	NA	NA	NA	NA	NA	2	17469584	8e-08	450765	0.00106651	ukb-b-6519	TRUE	reported	igd	2	TRUE
Worrier / anxious feelings	rs11971935	G	T	G	T	-0.00713023	-0.0521	0.407609	0.3241	FALSE	FALSE	FALSE	finn-b-I9_ICH	7	127422539	0.0375	NA	0.1644	Intracerebral haemmorrhage || id:finn-b-I9_ICH	Intracerebral haemmorrhage	Intracerebral haemmorrhage || ||	TRUE	igd	NA	NA	NA	NA	NA	NA	NA	7	127422539	8.80035e-12	450765	0.00104471	ukb-b-6519	TRUE	reported	igd	2	TRUE
Worrier / anxious feelings	rs12054106	C	G	C	G	0.00495921	-0.0385	0.635908	0.5987	FALSE	TRUE	FALSE	finn-b-I9_ICH	3	69480580	0.0358	NA	0.2818	Intracerebral haemmorrhage || id:finn-b-I9_ICH	Intracerebral haemmorrhage	Intracerebral haemmorrhage || ||	TRUE	igd	NA	NA	NA	NA	NA	NA	NA	3	69480580	3.59998e-06	450765	0.00107099	ukb-b-6519	TRUE	reported	igd	2	TRUE
Worrier / anxious feelings	rs12102776	C	T	C	T	0.00651366	0.0237	0.631731	0.6017	FALSE	FALSE	FALSE	finn-b-I9_ICH	16	31166028	0.0361	NA	0.5117	Intracerebral haemmorrhage || id:finn-b-I9_ICH	Intracerebral haemmorrhage	Intracerebral haemmorrhage || ||	TRUE	igd	NA	NA	NA	NA	NA	NA	NA	16	31166028	1.6e-09	450765	0.0010803	ukb-b-6519	TRUE	reported	igd	2	TRUE
Worrier / anxious feelings	rs12150970	T	G	T	G	-0.00636345	-0.0061	0.197131	0.1323	FALSE	FALSE	FALSE	finn-b-I9_ICH	19	33927471	0.0523	NA	0.9074	Intracerebral haemmorrhage || id:finn-b-I9_ICH	Intracerebral haemmorrhage	Intracerebral haemmorrhage || ||	TRUE	igd	NA	NA	NA	NA	NA	NA	NA	19	33927471	8.40001e-07	450765	0.00129193	ukb-b-6519	TRUE	reported	igd	2	TRUE
Worrier / anxious feelings	rs1215970	G	C	G	C	-0.00532366	-0.0861	0.298385	0.2465	FALSE	TRUE	FALSE	finn-b-I9_ICH	9	133355965	0.041	NA	0.0357503	Intracerebral haemmorrhage || id:finn-b-I9_ICH	Intracerebral haemmorrhage	Intracerebral haemmorrhage || ||	TRUE	igd	NA	NA	NA	NA	NA	NA	NA	9	133355965	2.30001e-06	450765	0.00112649	ukb-b-6519	TRUE	reported	igd	2	TRUE
Worrier / anxious feelings	rs12241517	G	A	G	A	-0.00877924	-0.0024	0.328838	0.3252	FALSE	FALSE	FALSE	finn-b-I9_ICH	10	104621068	0.0375	NA	0.948	Intracerebral haemmorrhage || id:finn-b-I9_ICH	Intracerebral haemmorrhage	Intracerebral haemmorrhage || ||	TRUE	igd	NA	NA	NA	NA	NA	NA	NA	10	104621068	8.60003e-16	450765	0.00109126	ukb-b-6519	TRUE	reported	igd	2	TRUE
Worrier / anxious feelings	rs12365385	C	T	C	T	-0.00707523	-0.0329	0.365973	0.4455	FALSE	FALSE	FALSE	finn-b-I9_ICH	11	42850378	0.0356	NA	0.3549	Intracerebral haemmorrhage || id:finn-b-I9_ICH	Intracerebral haemmorrhage	Intracerebral haemmorrhage || ||	TRUE	igd	NA	NA	NA	NA	NA	NA	NA	11	42850378	3.29989e-11	450765	0.00106653	ukb-b-6519	TRUE	reported	igd	2	TRUE
Worrier / anxious feelings	rs12372258	A	G	A	G	-0.00987335	-0.0544	0.067122	0.1203	FALSE	FALSE	FALSE	finn-b-I9_ICH	12	97493030	0.0539	NA	0.3127	Intracerebral haemmorrhage || id:finn-b-I9_ICH	Intracerebral haemmorrhage	Intracerebral haemmorrhage || ||	TRUE	igd	NA	NA	NA	NA	NA	NA	NA	12	97493030	1.6e-06	450765	0.002059	ukb-b-6519	TRUE	reported	igd	2	TRUE
Worrier / anxious feelings	rs12373763	A	G	A	G	-0.00518563	-0.0635	0.633676	0.732	FALSE	FALSE	FALSE	finn-b-I9_ICH	2	60118138	0.0396	NA	0.1085	Intracerebral haemmorrhage || id:finn-b-I9_ICH	Intracerebral haemmorrhage	Intracerebral haemmorrhage || ||	TRUE	igd	NA	NA	NA	NA	NA	NA	NA	2	60118138	1.09999e-06	450765	0.00106376	ukb-b-6519	TRUE	reported	igd	2	TRUE
Worrier / anxious feelings	rs12434356	A	C	A	C	0.0073884	0.0178	0.520632	0.4954	FALSE	FALSE	FALSE	finn-b-I9_ICH	14	75123374	0.0351	NA	0.612901	Intracerebral haemmorrhage || id:finn-b-I9_ICH	Intracerebral haemmorrhage	Intracerebral haemmorrhage || ||	TRUE	igd	NA	NA	NA	NA	NA	NA	NA	14	75123374	5.70033e-13	450765	0.00102523	ukb-b-6519	TRUE	reported	igd	2	TRUE
Worrier / anxious feelings	rs12442313	G	A	G	A	0.00497491	-0.0149	0.437989	0.4308	FALSE	FALSE	FALSE	finn-b-I9_ICH	15	100125556	0.0355	NA	0.674	Intracerebral haemmorrhage || id:finn-b-I9_ICH	Intracerebral haemmorrhage	Intracerebral haemmorrhage || ||	TRUE	igd	NA	NA	NA	NA	NA	NA	NA	15	100125556	1.7e-06	450765	0.00103834	ukb-b-6519	TRUE	reported	igd	2	TRUE
Worrier / anxious feelings	rs12519314	C	T	C	T	0.00506156	-0.009	0.489977	0.4347	FALSE	FALSE	FALSE	finn-b-I9_ICH	5	12042297	0.0353	NA	0.7989	Intracerebral haemmorrhage || id:finn-b-I9_ICH	Intracerebral haemmorrhage	Intracerebral haemmorrhage || ||	TRUE	igd	NA	NA	NA	NA	NA	NA	NA	5	12042297	8.9e-07	450765	0.00102976	ukb-b-6519	TRUE	reported	igd	2	TRUE
Worrier / anxious feelings	rs12563842	C	T	C	T	-0.00513274	0.0591	0.296678	0.3317	FALSE	FALSE	FALSE	finn-b-I9_ICH	1	17980433	0.0374	NA	0.1146	Intracerebral haemmorrhage || id:finn-b-I9_ICH	Intracerebral haemmorrhage	Intracerebral haemmorrhage || ||	TRUE	igd	NA	NA	NA	NA	NA	NA	NA	1	17980433	4.90004e-06	450765	0.00112348	ukb-b-6519	TRUE	reported	igd	2	TRUE
Worrier / anxious feelings	rs12586312	C	T	C	T	0.0066148	0.0508	0.20713	0.216	FALSE	FALSE	FALSE	finn-b-I9_ICH	14	93796411	0.0426	NA	0.2324	Intracerebral haemmorrhage || id:finn-b-I9_ICH	Intracerebral haemmorrhage	Intracerebral haemmorrhage || ||	TRUE	igd	NA	NA	NA	NA	NA	NA	NA	14	93796411	1.7e-07	450765	0.00126425	ukb-b-6519	TRUE	reported	igd	2	TRUE
Worrier / anxious feelings	rs12648897	G	A	G	A	0.004901	0.0536	0.393938	0.2646	FALSE	FALSE	FALSE	finn-b-I9_ICH	4	178806760	0.0401	NA	0.1817	Intracerebral haemmorrhage || id:finn-b-I9_ICH	Intracerebral haemmorrhage	Intracerebral haemmorrhage || ||	TRUE	igd	NA	NA	NA	NA	NA	NA	NA	4	178806760	2.99999e-06	450765	0.00105002	ukb-b-6519	TRUE	reported	igd	2	TRUE
Worrier / anxious feelings	rs1289871	A	G	A	G	-0.00522583	-0.0616	0.369584	0.4068	FALSE	FALSE	FALSE	finn-b-I9_ICH	1	117864089	0.0358	NA	0.0855993	Intracerebral haemmorrhage || id:finn-b-I9_ICH	Intracerebral haemmorrhage	Intracerebral haemmorrhage || ||	TRUE	igd	NA	NA	NA	NA	NA	NA	NA	1	117864089	9.20005e-07	450765	0.00106461	ukb-b-6519	TRUE	reported	igd	2	TRUE
Worrier / anxious feelings	rs13213752	C	T	C	T	0.00722192	0.0247	0.501981	0.4075	FALSE	FALSE	FALSE	finn-b-I9_ICH	6	12014079	0.0358	NA	0.4902	Intracerebral haemmorrhage || id:finn-b-I9_ICH	Intracerebral haemmorrhage	Intracerebral haemmorrhage || ||	TRUE	igd	NA	NA	NA	NA	NA	NA	NA	6	12014079	2.09991e-12	450765	0.00102805	ukb-b-6519	TRUE	reported	igd	2	TRUE
Worrier / anxious feelings	rs13262595	G	A	G	A	-0.00568733	-0.0215	0.561021	0.5967	FALSE	FALSE	FALSE	finn-b-I9_ICH	8	143316970	0.0358	NA	0.547599	Intracerebral haemmorrhage || id:finn-b-I9_ICH	Intracerebral haemmorrhage	Intracerebral haemmorrhage || ||	TRUE	igd	NA	NA	NA	NA	NA	NA	NA	8	143316970	3.69999e-08	450765	0.00103288	ukb-b-6519	TRUE	reported	igd	2	TRUE
Worrier / anxious feelings	rs13324323	T	C	T	C	-0.00654495	-0.0572	0.215493	0.2661	FALSE	FALSE	FALSE	finn-b-I9_ICH	3	166707276	0.0399	NA	0.152	Intracerebral haemmorrhage || id:finn-b-I9_ICH	Intracerebral haemmorrhage	Intracerebral haemmorrhage || ||	TRUE	igd	NA	NA	NA	NA	NA	NA	NA	3	166707276	1.6e-07	450765	0.00124834	ukb-b-6519	TRUE	reported	igd	2	TRUE
Worrier / anxious feelings	rs13399553	C	T	C	T	0.00594229	0.0408	0.377977	0.4707	FALSE	FALSE	FALSE	finn-b-I9_ICH	2	148576732	0.0353	NA	0.2472	Intracerebral haemmorrhage || id:finn-b-I9_ICH	Intracerebral haemmorrhage	Intracerebral haemmorrhage || ||	TRUE	igd	NA	NA	NA	NA	NA	NA	NA	2	148576732	2.1e-08	450765	0.00105985	ukb-b-6519	TRUE	reported	igd	2	TRUE
Worrier / anxious feelings	rs1364063	C	T	C	T	0.00496873	-0.014	0.408745	0.4284	FALSE	FALSE	FALSE	finn-b-I9_ICH	16	69588572	0.0356	NA	0.6933	Intracerebral haemmorrhage || id:finn-b-I9_ICH	Intracerebral haemmorrhage	Intracerebral haemmorrhage || ||	TRUE	igd	NA	NA	NA	NA	NA	NA	NA	16	69588572	1.89998e-06	450765	0.00104386	ukb-b-6519	TRUE	reported	igd	2	TRUE
Worrier / anxious feelings	rs138452124	A	G	A	G	-0.0142285	0.0763	0.043669	0.01332	FALSE	FALSE	FALSE	finn-b-I9_ICH	1	76508017	0.1558	NA	0.6243	Intracerebral haemmorrhage || id:finn-b-I9_ICH	Intracerebral haemmorrhage	Intracerebral haemmorrhage || ||	TRUE	igd	NA	NA	NA	NA	NA	NA	NA	1	76508017	7.79992e-08	450765	0.00264897	ukb-b-6519	TRUE	reported	igd	2	TRUE
Worrier / anxious feelings	rs143605080	G	A	G	A	0.0190483	-0.0393	0.015793	0.02342	FALSE	FALSE	FALSE	finn-b-I9_ICH	19	36289845	0.1175	NA	0.737901	Intracerebral haemmorrhage || id:finn-b-I9_ICH	Intracerebral haemmorrhage	Intracerebral haemmorrhage || ||	TRUE	igd	NA	NA	NA	NA	NA	NA	NA	19	36289845	4.70002e-06	450765	0.00415927	ukb-b-6519	TRUE	reported	igd	2	TRUE
Worrier / anxious feelings	rs1455079	G	T	G	T	0.00589113	-0.0013	0.239159	0.247	FALSE	FALSE	FALSE	finn-b-I9_ICH	6	67452305	0.0407	NA	0.974	Intracerebral haemmorrhage || id:finn-b-I9_ICH	Intracerebral haemmorrhage	Intracerebral haemmorrhage || ||	TRUE	igd	NA	NA	NA	NA	NA	NA	NA	6	67452305	1e-06	450765	0.00120644	ukb-b-6519	TRUE	reported	igd	2	TRUE
Worrier / anxious feelings	rs145961713	A	G	A	G	-0.0169972	-0.055	0.021579	0.004565	FALSE	FALSE	FALSE	finn-b-I9_ICH	20	17296828	0.2656	NA	0.8359	Intracerebral haemmorrhage || id:finn-b-I9_ICH	Intracerebral haemmorrhage	Intracerebral haemmorrhage || ||	TRUE	igd	NA	NA	NA	NA	NA	NA	NA	20	17296828	2.39999e-06	450765	0.0036039	ukb-b-6519	TRUE	reported	igd	2	TRUE
Worrier / anxious feelings	rs1471483	C	T	C	T	0.00499886	-0.0069	0.519702	0.5744	FALSE	FALSE	FALSE	finn-b-I9_ICH	4	90754292	0.0355	NA	0.8458	Intracerebral haemmorrhage || id:finn-b-I9_ICH	Intracerebral haemmorrhage	Intracerebral haemmorrhage || ||	TRUE	igd	NA	NA	NA	NA	NA	NA	NA	4	90754292	1.09999e-06	450765	0.00102676	ukb-b-6519	TRUE	reported	igd	2	TRUE
Worrier / anxious feelings	rs150293	A	G	A	G	-0.00582512	-0.0442	0.313462	0.3179	FALSE	FALSE	FALSE	finn-b-I9_ICH	15	89934817	0.0378	NA	0.2428	Intracerebral haemmorrhage || id:finn-b-I9_ICH	Intracerebral haemmorrhage	Intracerebral haemmorrhage || ||	TRUE	igd	NA	NA	NA	NA	NA	NA	NA	15	89934817	1.7e-07	450765	0.0011135	ukb-b-6519	TRUE	reported	igd	2	TRUE
Worrier / anxious feelings	rs150339458	T	C	T	C	-0.0138196	-0.2331	0.032579	0.01919	FALSE	FALSE	FALSE	finn-b-I9_ICH	7	54010489	0.1288	NA	0.0703008	Intracerebral haemmorrhage || id:finn-b-I9_ICH	Intracerebral haemmorrhage	Intracerebral haemmorrhage || ||	TRUE	igd	NA	NA	NA	NA	NA	NA	NA	7	54010489	2.1e-06	450765	0.00291183	ukb-b-6519	TRUE	reported	igd	2	TRUE
Worrier / anxious feelings	rs1506	A	T	A	T	-0.00797785	0.1347	0.79834	0.7773	FALSE	TRUE	FALSE	finn-b-I9_ICH	11	31810298	0.0422	NA	0.00142699	Intracerebral haemmorrhage || id:finn-b-I9_ICH	Intracerebral haemmorrhage	Intracerebral haemmorrhage || ||	TRUE	igd	NA	NA	NA	NA	NA	NA	NA	11	31810298	4.30002e-10	450765	0.0012782	ukb-b-6519	TRUE	reported	igd	2	TRUE
Worrier / anxious feelings	rs1567281	T	C	T	C	0.00722454	0.0058	0.855858	0.887	FALSE	FALSE	FALSE	finn-b-I9_ICH	4	101725140	0.0554	NA	0.9166	Intracerebral haemmorrhage || id:finn-b-I9_ICH	Intracerebral haemmorrhage	Intracerebral haemmorrhage || ||	TRUE	igd	NA	NA	NA	NA	NA	NA	NA	4	101725140	9.09997e-07	450765	0.00147127	ukb-b-6519	TRUE	reported	igd	2	TRUE
Worrier / anxious feelings	rs1660235	G	C	G	C	0.00729017	0.0072	0.386462	0.3794	FALSE	TRUE	FALSE	finn-b-I9_ICH	18	53009757	0.0363	NA	0.8426	Intracerebral haemmorrhage || id:finn-b-I9_ICH	Intracerebral haemmorrhage	Intracerebral haemmorrhage || ||	TRUE	igd	NA	NA	NA	NA	NA	NA	NA	18	53009757	6.09958e-12	450765	0.00106016	ukb-b-6519	TRUE	reported	igd	2	TRUE
Worrier / anxious feelings	rs167978	A	G	A	G	-0.00537948	-0.0205	0.59167	0.566	FALSE	FALSE	FALSE	finn-b-I9_ICH	1	61722175	0.0357	NA	0.566601	Intracerebral haemmorrhage || id:finn-b-I9_ICH	Intracerebral haemmorrhage	Intracerebral haemmorrhage || ||	TRUE	igd	NA	NA	NA	NA	NA	NA	NA	1	61722175	4.09996e-07	450765	0.00106261	ukb-b-6519	TRUE	reported	igd	2	TRUE
Worrier / anxious feelings	rs16854051	T	C	T	C	-0.00620566	0.066	0.207862	0.1911	FALSE	FALSE	FALSE	finn-b-I9_ICH	4	42123892	0.0449	NA	0.1422	Intracerebral haemmorrhage || id:finn-b-I9_ICH	Intracerebral haemmorrhage	Intracerebral haemmorrhage || ||	TRUE	igd	NA	NA	NA	NA	NA	NA	NA	4	42123892	1.09999e-06	450765	0.00127484	ukb-b-6519	TRUE	reported	igd	2	TRUE
Worrier / anxious feelings	rs16868993	C	G	C	G	0.00710407	-0.0098	0.156542	0.1385	FALSE	TRUE	FALSE	finn-b-I9_ICH	6	43150302	0.0511	NA	0.8474	Intracerebral haemmorrhage || id:finn-b-I9_ICH	Intracerebral haemmorrhage	Intracerebral haemmorrhage || ||	TRUE	igd	NA	NA	NA	NA	NA	NA	NA	6	43150302	5.30005e-07	450765	0.00141606	ukb-b-6519	TRUE	reported	igd	2	TRUE
Worrier / anxious feelings	rs17059916	A	G	A	G	0.00821753	-0.0047	0.106245	0.1198	FALSE	FALSE	FALSE	finn-b-I9_ICH	5	161391350	0.0543	NA	0.9314	Intracerebral haemmorrhage || id:finn-b-I9_ICH	Intracerebral haemmorrhage	Intracerebral haemmorrhage || ||	TRUE	igd	NA	NA	NA	NA	NA	NA	NA	5	161391350	7.90005e-07	450765	0.00166403	ukb-b-6519	TRUE	reported	igd	2	TRUE
Worrier / anxious feelings	rs17156675	T	C	T	C	0.00528479	-0.0129	0.303779	0.3155	FALSE	FALSE	FALSE	finn-b-I9_ICH	7	82422405	0.0378	NA	0.7329	Intracerebral haemmorrhage || id:finn-b-I9_ICH	Intracerebral haemmorrhage	Intracerebral haemmorrhage || ||	TRUE	igd	NA	NA	NA	NA	NA	NA	NA	7	82422405	2.30001e-06	450765	0.00111773	ukb-b-6519	TRUE	reported	igd	2	TRUE
Worrier / anxious feelings	rs17309874	A	G	A	G	-0.00731338	-0.0172	0.259463	0.277	FALSE	FALSE	FALSE	finn-b-I9_ICH	11	27667236	0.0392	NA	0.6604	Intracerebral haemmorrhage || id:finn-b-I9_ICH	Intracerebral haemmorrhage	Intracerebral haemmorrhage || ||	TRUE	igd	NA	NA	NA	NA	NA	NA	NA	11	27667236	4.30002e-10	450765	0.00117147	ukb-b-6519	TRUE	reported	igd	2	TRUE
Worrier / anxious feelings	rs17405651	C	G	C	G	-0.0102723	0.0182	0.0988	0.03636	FALSE	TRUE	FALSE	finn-b-I9_ICH	4	131022733	0.0984	NA	0.8529	Intracerebral haemmorrhage || id:finn-b-I9_ICH	Intracerebral haemmorrhage	Intracerebral haemmorrhage || ||	TRUE	igd	NA	NA	NA	NA	NA	NA	NA	4	131022733	1.40001e-08	450765	0.00181076	ukb-b-6519	TRUE	reported	igd	2	TRUE
Worrier / anxious feelings	rs17641524	T	C	T	C	-0.00969018	0.0236	0.209899	0.1457	FALSE	FALSE	FALSE	finn-b-I9_ICH	1	197704717	0.0499	NA	0.6363	Intracerebral haemmorrhage || id:finn-b-I9_ICH	Intracerebral haemmorrhage	Intracerebral haemmorrhage || ||	TRUE	igd	NA	NA	NA	NA	NA	NA	NA	1	197704717	1.29987e-14	450765	0.00125823	ukb-b-6519	TRUE	reported	igd	2	TRUE
Worrier / anxious feelings	rs17782915	C	T	C	T	-0.0055512	-0.019	0.380257	0.4016	FALSE	FALSE	FALSE	finn-b-I9_ICH	5	100303867	0.0359	NA	0.5972	Intracerebral haemmorrhage || id:finn-b-I9_ICH	Intracerebral haemmorrhage	Intracerebral haemmorrhage || ||	TRUE	igd	NA	NA	NA	NA	NA	NA	NA	5	100303867	1.6e-07	450765	0.00105932	ukb-b-6519	TRUE	reported	igd	2	TRUE
Worrier / anxious feelings	rs1808400	G	T	G	T	0.00892309	-0.0075	0.911419	0.8838	FALSE	FALSE	FALSE	finn-b-I9_ICH	5	61556795	0.0548	NA	0.8904	Intracerebral haemmorrhage || id:finn-b-I9_ICH	Intracerebral haemmorrhage	Intracerebral haemmorrhage || ||	TRUE	igd	NA	NA	NA	NA	NA	NA	NA	5	61556795	8.79995e-07	450765	0.00181494	ukb-b-6519	TRUE	reported	igd	2	TRUE
Worrier / anxious feelings	rs182280713	G	T	G	T	0.0196192	-0.3733	0.018723	0.007421	FALSE	FALSE	FALSE	finn-b-I9_ICH	7	3677300	0.2073	NA	0.0717596	Intracerebral haemmorrhage || id:finn-b-I9_ICH	Intracerebral haemmorrhage	Intracerebral haemmorrhage || ||	TRUE	igd	NA	NA	NA	NA	NA	NA	NA	7	3677300	2.80001e-07	450765	0.00381757	ukb-b-6519	TRUE	reported	igd	2	TRUE
Worrier / anxious feelings	rs182378	G	A	G	A	-0.00567839	0.0757	0.25854	0.1847	FALSE	FALSE	FALSE	finn-b-I9_ICH	4	28476895	0.0451	NA	0.0930508	Intracerebral haemmorrhage || id:finn-b-I9_ICH	Intracerebral haemmorrhage	Intracerebral haemmorrhage || ||	TRUE	igd	NA	NA	NA	NA	NA	NA	NA	4	28476895	1.29999e-06	450765	0.0011726	ukb-b-6519	TRUE	reported	igd	2	TRUE
Worrier / anxious feelings	rs1833718	C	T	C	T	0.00686236	0.04	0.632239	0.6448	FALSE	FALSE	FALSE	finn-b-I9_ICH	5	164635015	0.0368	NA	0.2761	Intracerebral haemmorrhage || id:finn-b-I9_ICH	Intracerebral haemmorrhage	Intracerebral haemmorrhage || ||	TRUE	igd	NA	NA	NA	NA	NA	NA	NA	5	164635015	1.2e-10	450765	0.0010661	ukb-b-6519	TRUE	reported	igd	2	TRUE
Worrier / anxious feelings	rs185328228	G	T	G	T	-0.0268378	-0.0249	0.01149	0.008518	FALSE	FALSE	FALSE	finn-b-I9_ICH	5	50176755	0.1949	NA	0.8983	Intracerebral haemmorrhage || id:finn-b-I9_ICH	Intracerebral haemmorrhage	Intracerebral haemmorrhage || ||	TRUE	igd	NA	NA	NA	NA	NA	NA	NA	5	50176755	1.40001e-07	450765	0.00509291	ukb-b-6519	TRUE	reported	igd	2	TRUE
Worrier / anxious feelings	rs187580	G	T	G	T	-0.00782209	-0.0356	0.237953	0.2316	FALSE	FALSE	FALSE	finn-b-I9_ICH	5	102627355	0.0417	NA	0.3938	Intracerebral haemmorrhage || id:finn-b-I9_ICH	Intracerebral haemmorrhage	Intracerebral haemmorrhage || ||	TRUE	igd	NA	NA	NA	NA	NA	NA	NA	5	102627355	9.20026e-11	450765	0.00120706	ukb-b-6519	TRUE	reported	igd	2	TRUE
Worrier / anxious feelings	rs1936158	T	G	T	G	-0.00496877	-0.0268	0.375745	0.3543	FALSE	FALSE	FALSE	finn-b-I9_ICH	6	78184375	0.0369	NA	0.4675	Intracerebral haemmorrhage || id:finn-b-I9_ICH	Intracerebral haemmorrhage	Intracerebral haemmorrhage || ||	TRUE	igd	NA	NA	NA	NA	NA	NA	NA	6	78184375	2.90001e-06	450765	0.00106256	ukb-b-6519	TRUE	reported	igd	2	TRUE
Worrier / anxious feelings	rs194179	G	A	G	A	-0.00580691	-0.0046	0.432638	0.4057	FALSE	FALSE	FALSE	finn-b-I9_ICH	3	134715784	0.0357	NA	0.8972	Intracerebral haemmorrhage || id:finn-b-I9_ICH	Intracerebral haemmorrhage	Intracerebral haemmorrhage || ||	TRUE	igd	NA	NA	NA	NA	NA	NA	NA	3	134715784	2.1e-08	450765	0.0010369	ukb-b-6519	TRUE	reported	igd	2	TRUE
Worrier / anxious feelings	rs199931	T	G	T	G	0.00587571	-0.0142	0.242565	0.2388	FALSE	FALSE	FALSE	finn-b-I9_ICH	1	181742767	0.0413	NA	0.7302	Intracerebral haemmorrhage || id:finn-b-I9_ICH	Intracerebral haemmorrhage	Intracerebral haemmorrhage || ||	TRUE	igd	NA	NA	NA	NA	NA	NA	NA	1	181742767	9.69996e-07	450765	0.00119963	ukb-b-6519	TRUE	reported	igd	2	TRUE
Worrier / anxious feelings	rs2025106	C	T	C	T	-0.00514369	-0.0191	0.336907	0.2828	FALSE	FALSE	FALSE	finn-b-I9_ICH	10	103101504	0.0392	NA	0.6262	Intracerebral haemmorrhage || id:finn-b-I9_ICH	Intracerebral haemmorrhage	Intracerebral haemmorrhage || ||	TRUE	igd	NA	NA	NA	NA	NA	NA	NA	10	103101504	2.19999e-06	450765	0.00108725	ukb-b-6519	TRUE	reported	igd	2	TRUE
Worrier / anxious feelings	rs2131452	G	A	G	A	0.00494929	0.0399	0.548679	0.5648	FALSE	FALSE	FALSE	finn-b-I9_ICH	4	4802092	0.0355	NA	0.261	Intracerebral haemmorrhage || id:finn-b-I9_ICH	Intracerebral haemmorrhage	Intracerebral haemmorrhage || ||	TRUE	igd	NA	NA	NA	NA	NA	NA	NA	4	4802092	1.7e-06	450765	0.00103383	ukb-b-6519	TRUE	reported	igd	2	TRUE
Worrier / anxious feelings	rs2217042	C	T	C	T	-0.00747028	-0.0178	0.118062	0.131	FALSE	FALSE	FALSE	finn-b-I9_ICH	11	127881870	0.0523	NA	0.733	Intracerebral haemmorrhage || id:finn-b-I9_ICH	Intracerebral haemmorrhage	Intracerebral haemmorrhage || ||	TRUE	igd	NA	NA	NA	NA	NA	NA	NA	11	127881870	2.99999e-06	450765	0.00159886	ukb-b-6519	TRUE	reported	igd	2	TRUE
Worrier / anxious feelings	rs2238194	T	C	T	C	-0.00618891	0.0989	0.187881	0.2071	FALSE	FALSE	FALSE	finn-b-I9_ICH	14	72804125	0.0435	NA	0.0230898	Intracerebral haemmorrhage || id:finn-b-I9_ICH	Intracerebral haemmorrhage	Intracerebral haemmorrhage || ||	TRUE	igd	NA	NA	NA	NA	NA	NA	NA	14	72804125	2.5e-06	450765	0.00131536	ukb-b-6519	TRUE	reported	igd	2	TRUE
Worrier / anxious feelings	rs226060	A	G	A	G	-0.00585256	-0.0749	0.720633	0.6763	FALSE	FALSE	FALSE	finn-b-I9_ICH	1	44801174	0.0374	NA	0.0454098	Intracerebral haemmorrhage || id:finn-b-I9_ICH	Intracerebral haemmorrhage	Intracerebral haemmorrhage || ||	TRUE	igd	NA	NA	NA	NA	NA	NA	NA	1	44801174	2.99999e-07	450765	0.00114183	ukb-b-6519	TRUE	reported	igd	2	TRUE
Worrier / anxious feelings	rs2309592	A	G	A	G	0.0066005	0.04	0.302127	0.2854	FALSE	FALSE	FALSE	finn-b-I9_ICH	4	183080946	0.0392	NA	0.308	Intracerebral haemmorrhage || id:finn-b-I9_ICH	Intracerebral haemmorrhage	Intracerebral haemmorrhage || ||	TRUE	igd	NA	NA	NA	NA	NA	NA	NA	4	183080946	5.89997e-09	450765	0.00113417	ukb-b-6519	TRUE	reported	igd	2	TRUE
Worrier / anxious feelings	rs2344700	G	A	G	A	0.00691396	0.027	0.321443	0.3942	FALSE	FALSE	FALSE	finn-b-I9_ICH	2	199686506	0.0363	NA	0.4564	Intracerebral haemmorrhage || id:finn-b-I9_ICH	Intracerebral haemmorrhage	Intracerebral haemmorrhage || ||	TRUE	igd	NA	NA	NA	NA	NA	NA	NA	2	199686506	8.40001e-10	450765	0.00112654	ukb-b-6519	TRUE	reported	igd	2	TRUE
Worrier / anxious feelings	rs2367724	T	C	T	C	0.00716112	0.0774	0.67278	0.6732	FALSE	FALSE	FALSE	finn-b-I9_ICH	1	44107428	0.0374	NA	0.0384999	Intracerebral haemmorrhage || id:finn-b-I9_ICH	Intracerebral haemmorrhage	Intracerebral haemmorrhage || ||	TRUE	igd	NA	NA	NA	NA	NA	NA	NA	1	44107428	5.40008e-11	450765	0.00109177	ukb-b-6519	TRUE	reported	igd	2	TRUE
Worrier / anxious feelings	rs236900	A	G	A	G	-0.00736322	0.0078	0.188122	0.1996	FALSE	FALSE	FALSE	finn-b-I9_ICH	1	171676795	0.0443	NA	0.8608	Intracerebral haemmorrhage || id:finn-b-I9_ICH	Intracerebral haemmorrhage	Intracerebral haemmorrhage || ||	TRUE	igd	NA	NA	NA	NA	NA	NA	NA	1	171676795	2.39999e-08	450765	0.00132028	ukb-b-6519	TRUE	reported	igd	2	TRUE
Worrier / anxious feelings	rs2406908	T	C	T	C	-0.00512249	0.0011	0.442567	0.3954	FALSE	FALSE	FALSE	finn-b-I9_ICH	5	81247381	0.036	NA	0.976	Intracerebral haemmorrhage || id:finn-b-I9_ICH	Intracerebral haemmorrhage	Intracerebral haemmorrhage || ||	TRUE	igd	TRUE	rs2406908	rs1542596	T	C	A	G	5	81240607	7.79992e-07	450765	0.00103711	ukb-b-6519	TRUE	reported	igd	2	TRUE
Worrier / anxious feelings	rs2407746	G	C	G	C	0.00561897	0.0209	0.305247	0.3557	FALSE	TRUE	FALSE	finn-b-I9_ICH	8	4937757	0.0367	NA	0.5684	Intracerebral haemmorrhage || id:finn-b-I9_ICH	Intracerebral haemmorrhage	Intracerebral haemmorrhage || ||	TRUE	igd	NA	NA	NA	NA	NA	NA	NA	8	4937757	5e-07	450765	0.00111776	ukb-b-6519	TRUE	reported	igd	2	TRUE
Worrier / anxious feelings	rs2413631	A	G	A	G	0.00691546	0.089	0.248859	0.218	FALSE	FALSE	FALSE	finn-b-I9_ICH	22	41359786	0.0426	NA	0.0366598	Intracerebral haemmorrhage || id:finn-b-I9_ICH	Intracerebral haemmorrhage	Intracerebral haemmorrhage || ||	TRUE	igd	NA	NA	NA	NA	NA	NA	NA	22	41359786	6.59994e-09	450765	0.00119213	ukb-b-6519	TRUE	reported	igd	2	TRUE
Worrier / anxious feelings	rs2435582	T	C	T	C	0.00492334	-0.0651	0.403958	0.4457	FALSE	FALSE	FALSE	finn-b-I9_ICH	11	98577452	0.0354	NA	0.0656599	Intracerebral haemmorrhage || id:finn-b-I9_ICH	Intracerebral haemmorrhage	Intracerebral haemmorrhage || ||	TRUE	igd	NA	NA	NA	NA	NA	NA	NA	11	98577452	2.59998e-06	450765	0.00104803	ukb-b-6519	TRUE	reported	igd	2	TRUE
Worrier / anxious feelings	rs2607863	C	T	C	T	-0.0113629	0.0575	0.945499	0.9678	FALSE	FALSE	FALSE	finn-b-I9_ICH	10	88024443	0.1004	NA	0.5672	Intracerebral haemmorrhage || id:finn-b-I9_ICH	Intracerebral haemmorrhage	Intracerebral haemmorrhage || ||	TRUE	igd	NA	NA	NA	NA	NA	NA	NA	10	88024443	5.39995e-07	450765	0.00226811	ukb-b-6519	TRUE	reported	igd	2	TRUE
Worrier / anxious feelings	rs2678897	A	G	A	G	0.00643819	0.0476	0.607465	0.6272	FALSE	FALSE	FALSE	finn-b-I9_ICH	2	58169418	0.0365	NA	0.1917	Intracerebral haemmorrhage || id:finn-b-I9_ICH	Intracerebral haemmorrhage	Intracerebral haemmorrhage || ||	TRUE	igd	NA	NA	NA	NA	NA	NA	NA	2	58169418	9.69996e-10	450765	0.001053	ukb-b-6519	TRUE	reported	igd	2	TRUE
Worrier / anxious feelings	rs2711094	G	C	G	C	0.00639676	0.0734	0.176271	0.1881	FALSE	TRUE	FALSE	finn-b-I9_ICH	7	24614960	0.0448	NA	0.1011	Intracerebral haemmorrhage || id:finn-b-I9_ICH	Intracerebral haemmorrhage	Intracerebral haemmorrhage || ||	TRUE	igd	NA	NA	NA	NA	NA	NA	NA	7	24614960	2.30001e-06	450765	0.00135256	ukb-b-6519	TRUE	reported	igd	2	TRUE
Worrier / anxious feelings	rs2745246	T	A	T	A	-0.00783061	0.013	0.209712	0.2241	FALSE	TRUE	FALSE	finn-b-I9_ICH	1	21648756	0.0423	NA	0.758099	Intracerebral haemmorrhage || id:finn-b-I9_ICH	Intracerebral haemmorrhage	Intracerebral haemmorrhage || ||	TRUE	igd	NA	NA	NA	NA	NA	NA	NA	1	21648756	7.00003e-10	450765	0.00126984	ukb-b-6519	TRUE	reported	igd	2	TRUE
Worrier / anxious feelings	rs274640	A	G	A	G	-0.00686164	0.0362	0.414121	0.395	FALSE	FALSE	FALSE	finn-b-I9_ICH	7	86269181	0.0359	NA	0.3127	Intracerebral haemmorrhage || id:finn-b-I9_ICH	Intracerebral haemmorrhage	Intracerebral haemmorrhage || ||	TRUE	igd	TRUE	rs274640	rs274632	A	G	A	C	7	86257016	4.19952e-11	450765	0.0010403	ukb-b-6519	TRUE	reported	igd	2	TRUE
Worrier / anxious feelings	rs2815748	A	G	A	G	0.0071112	-0.0102	0.803394	0.8596	FALSE	FALSE	FALSE	finn-b-I9_ICH	1	72816147	0.0507	NA	0.8403	Intracerebral haemmorrhage || id:finn-b-I9_ICH	Intracerebral haemmorrhage	Intracerebral haemmorrhage || ||	TRUE	igd	NA	NA	NA	NA	NA	NA	NA	1	72816147	3.50002e-08	450765	0.00128951	ukb-b-6519	TRUE	reported	igd	2	TRUE
Worrier / anxious feelings	rs28559700	T	C	T	C	-0.00626864	0.0058	0.790375	0.8537	FALSE	FALSE	FALSE	finn-b-I9_ICH	21	43246223	0.05	NA	0.9074	Intracerebral haemmorrhage || id:finn-b-I9_ICH	Intracerebral haemmorrhage	Intracerebral haemmorrhage || ||	TRUE	igd	NA	NA	NA	NA	NA	NA	NA	21	43246223	7.10003e-07	450765	0.00126441	ukb-b-6519	TRUE	reported	igd	2	TRUE
Worrier / anxious feelings	rs294379	A	T	A	T	0.00743731	-0.0261	0.724037	0.7779	FALSE	TRUE	FALSE	finn-b-I9_ICH	11	30613898	0.0425	NA	0.5385	Intracerebral haemmorrhage || id:finn-b-I9_ICH	Intracerebral haemmorrhage	Intracerebral haemmorrhage || ||	TRUE	igd	NA	NA	NA	NA	NA	NA	NA	11	30613898	9.79941e-11	450765	0.0011495	ukb-b-6519	TRUE	reported	igd	2	TRUE
Worrier / anxious feelings	rs297346	G	A	G	A	-0.00502638	-0.0349	0.637603	0.7536	FALSE	FALSE	FALSE	finn-b-I9_ICH	11	16355771	0.0411	NA	0.3959	Intracerebral haemmorrhage || id:finn-b-I9_ICH	Intracerebral haemmorrhage	Intracerebral haemmorrhage || ||	TRUE	igd	NA	NA	NA	NA	NA	NA	NA	11	16355771	2.59998e-06	450765	0.00107022	ukb-b-6519	TRUE	reported	igd	2	TRUE
Worrier / anxious feelings	rs341365	A	G	A	G	-0.00576203	-0.0573	0.304563	0.2741	FALSE	FALSE	FALSE	finn-b-I9_ICH	15	61165984	0.0397	NA	0.1489	Intracerebral haemmorrhage || id:finn-b-I9_ICH	Intracerebral haemmorrhage	Intracerebral haemmorrhage || ||	TRUE	igd	NA	NA	NA	NA	NA	NA	NA	15	61165984	2.5e-07	450765	0.00111733	ukb-b-6519	TRUE	reported	igd	2	TRUE
Worrier / anxious feelings	rs34241773	T	C	T	C	-0.00783629	-0.0192	0.113786	0.1063	FALSE	FALSE	FALSE	finn-b-I9_ICH	1	2378046	0.0577	NA	0.7396	Intracerebral haemmorrhage || id:finn-b-I9_ICH	Intracerebral haemmorrhage	Intracerebral haemmorrhage || ||	TRUE	igd	NA	NA	NA	NA	NA	NA	NA	1	2378046	1.5e-06	450765	0.00162716	ukb-b-6519	TRUE	reported	igd	2	TRUE
Worrier / anxious feelings	rs35957842	C	T	C	T	-0.0063497	-0.0297	0.267748	0.3523	FALSE	FALSE	FALSE	finn-b-I9_ICH	3	107382291	0.037	NA	0.4225	Intracerebral haemmorrhage || id:finn-b-I9_ICH	Intracerebral haemmorrhage	Intracerebral haemmorrhage || ||	TRUE	igd	NA	NA	NA	NA	NA	NA	NA	3	107382291	4.39997e-08	450765	0.00115966	ukb-b-6519	TRUE	reported	igd	2	TRUE
Worrier / anxious feelings	rs36006259	T	C	T	C	-0.00659553	0.0091	0.15787	0.1998	FALSE	FALSE	FALSE	finn-b-I9_ICH	14	30268871	0.0443	NA	0.8365	Intracerebral haemmorrhage || id:finn-b-I9_ICH	Intracerebral haemmorrhage	Intracerebral haemmorrhage || ||	TRUE	igd	NA	NA	NA	NA	NA	NA	NA	14	30268871	4e-06	450765	0.00143	ukb-b-6519	TRUE	reported	igd	2	TRUE
Worrier / anxious feelings	rs3765154	C	T	C	T	0.00562944	-0.0162	0.699535	0.6506	FALSE	FALSE	FALSE	finn-b-I9_ICH	2	60783572	0.0368	NA	0.660201	Intracerebral haemmorrhage || id:finn-b-I9_ICH	Intracerebral haemmorrhage	Intracerebral haemmorrhage || ||	TRUE	igd	NA	NA	NA	NA	NA	NA	NA	2	60783572	5.49997e-07	450765	0.00112394	ukb-b-6519	TRUE	reported	igd	2	TRUE
Worrier / anxious feelings	rs3780573	A	G	A	G	0.00986502	-0.0565	0.095243	0.1046	FALSE	FALSE	FALSE	finn-b-I9_ICH	9	98239503	0.0579	NA	0.3296	Intracerebral haemmorrhage || id:finn-b-I9_ICH	Intracerebral haemmorrhage	Intracerebral haemmorrhage || ||	TRUE	igd	NA	NA	NA	NA	NA	NA	NA	9	98239503	1.6e-08	450765	0.0017465	ukb-b-6519	TRUE	reported	igd	2	TRUE
Worrier / anxious feelings	rs4076427	C	G	C	G	0.00501473	0.0371	0.390691	0.3227	FALSE	TRUE	FALSE	finn-b-I9_ICH	17	79087537	0.0376	NA	0.3238	Intracerebral haemmorrhage || id:finn-b-I9_ICH	Intracerebral haemmorrhage	Intracerebral haemmorrhage || ||	TRUE	igd	NA	NA	NA	NA	NA	NA	NA	17	79087537	2.19999e-06	450765	0.00105862	ukb-b-6519	TRUE	reported	igd	2	TRUE
Worrier / anxious feelings	rs4405857	C	G	C	G	0.00523571	0.0036	0.60058	0.6581	FALSE	TRUE	FALSE	finn-b-I9_ICH	3	65445527	0.0371	NA	0.9237	Intracerebral haemmorrhage || id:finn-b-I9_ICH	Intracerebral haemmorrhage	Intracerebral haemmorrhage || ||	TRUE	igd	NA	NA	NA	NA	NA	NA	NA	3	65445527	5.89997e-07	450765	0.00104798	ukb-b-6519	TRUE	reported	igd	2	TRUE
Worrier / anxious feelings	rs4408428	G	A	G	A	0.00661467	0.0743	0.850226	0.7937	FALSE	FALSE	FALSE	finn-b-I9_ICH	13	69592489	0.0434	NA	0.0867002	Intracerebral haemmorrhage || id:finn-b-I9_ICH	Intracerebral haemmorrhage	Intracerebral haemmorrhage || ||	TRUE	igd	NA	NA	NA	NA	NA	NA	NA	13	69592489	4.39997e-06	450765	0.00144099	ukb-b-6519	TRUE	reported	igd	2	TRUE
Worrier / anxious feelings	rs4444227	T	C	T	C	-0.00770641	-0.0303	0.22078	0.2728	FALSE	FALSE	FALSE	finn-b-I9_ICH	13	59116160	0.0393	NA	0.4407	Intracerebral haemmorrhage || id:finn-b-I9_ICH	Intracerebral haemmorrhage	Intracerebral haemmorrhage || ||	TRUE	igd	NA	NA	NA	NA	NA	NA	NA	13	59116160	5.1e-10	450765	0.00123974	ukb-b-6519	TRUE	reported	igd	2	TRUE
Worrier / anxious feelings	rs4468381	T	C	T	C	0.00704114	-0.0443	0.172943	0.1724	FALSE	FALSE	FALSE	finn-b-I9_ICH	11	115048420	0.0464	NA	0.3389	Intracerebral haemmorrhage || id:finn-b-I9_ICH	Intracerebral haemmorrhage	Intracerebral haemmorrhage || ||	TRUE	igd	NA	NA	NA	NA	NA	NA	NA	11	115048420	2.1e-07	450765	0.00135775	ukb-b-6519	TRUE	reported	igd	2	TRUE
Worrier / anxious feelings	rs4472337	T	C	T	C	-0.00711963	0.0016	0.155686	0.2094	FALSE	FALSE	FALSE	finn-b-I9_ICH	6	34769765	0.0438	NA	0.9714	Intracerebral haemmorrhage || id:finn-b-I9_ICH	Intracerebral haemmorrhage	Intracerebral haemmorrhage || ||	TRUE	igd	NA	NA	NA	NA	NA	NA	NA	6	34769765	4.70002e-07	450765	0.00141362	ukb-b-6519	TRUE	reported	igd	2	TRUE
Worrier / anxious feelings	rs4584615	C	T	C	T	-0.00557218	-0.0156	0.372269	0.4203	FALSE	FALSE	FALSE	finn-b-I9_ICH	12	60276229	0.0357	NA	0.6622	Intracerebral haemmorrhage || id:finn-b-I9_ICH	Intracerebral haemmorrhage	Intracerebral haemmorrhage || ||	TRUE	igd	NA	NA	NA	NA	NA	NA	NA	12	60276229	1.5e-07	450765	0.00106171	ukb-b-6519	TRUE	reported	igd	2	TRUE
Worrier / anxious feelings	rs4659554	G	A	G	A	-0.00593687	0.0262	0.279943	0.3262	FALSE	FALSE	FALSE	finn-b-I9_ICH	1	240077309	0.0375	NA	0.4849	Intracerebral haemmorrhage || id:finn-b-I9_ICH	Intracerebral haemmorrhage	Intracerebral haemmorrhage || ||	TRUE	igd	NA	NA	NA	NA	NA	NA	NA	1	240077309	2e-07	450765	0.00114144	ukb-b-6519	TRUE	reported	igd	2	TRUE
Worrier / anxious feelings	rs4729379	G	A	G	A	0.00523681	0.0321	0.683627	0.7241	FALSE	FALSE	FALSE	finn-b-I9_ICH	7	97390069	0.0394	NA	0.4151	Intracerebral haemmorrhage || id:finn-b-I9_ICH	Intracerebral haemmorrhage	Intracerebral haemmorrhage || ||	TRUE	igd	NA	NA	NA	NA	NA	NA	NA	7	97390069	2.30001e-06	450765	0.00110802	ukb-b-6519	TRUE	reported	igd	2	TRUE
Worrier / anxious feelings	rs4731328	C	T	C	T	0.0048886	0.0009	0.485696	0.5354	FALSE	FALSE	FALSE	finn-b-I9_ICH	7	126379490	0.0353	NA	0.9799	Intracerebral haemmorrhage || id:finn-b-I9_ICH	Intracerebral haemmorrhage	Intracerebral haemmorrhage || ||	TRUE	igd	NA	NA	NA	NA	NA	NA	NA	7	126379490	2e-06	450765	0.00102748	ukb-b-6519	TRUE	reported	igd	2	TRUE
Worrier / anxious feelings	rs4776280	G	A	G	A	0.00614748	0.0289	0.202262	0.1617	FALSE	FALSE	FALSE	finn-b-I9_ICH	15	66401410	0.0479	NA	0.5461	Intracerebral haemmorrhage || id:finn-b-I9_ICH	Intracerebral haemmorrhage	Intracerebral haemmorrhage || ||	TRUE	igd	NA	NA	NA	NA	NA	NA	NA	15	66401410	1.6e-06	450765	0.00128135	ukb-b-6519	TRUE	reported	igd	2	TRUE
Worrier / anxious feelings	rs4914930	C	T	C	T	0.0053027	0.0553	0.731514	0.7496	FALSE	FALSE	FALSE	finn-b-I9_ICH	1	107305375	0.0406	NA	0.1727	Intracerebral haemmorrhage || id:finn-b-I9_ICH	Intracerebral haemmorrhage	Intracerebral haemmorrhage || ||	TRUE	igd	NA	NA	NA	NA	NA	NA	NA	1	107305375	4.49997e-06	450765	0.00115628	ukb-b-6519	TRUE	reported	igd	2	TRUE
Worrier / anxious feelings	rs4963730	G	A	G	A	0.00533725	-0.0127	0.460486	0.4848	FALSE	FALSE	FALSE	finn-b-I9_ICH	12	24107019	0.0352	NA	0.717399	Intracerebral haemmorrhage || id:finn-b-I9_ICH	Intracerebral haemmorrhage	Intracerebral haemmorrhage || ||	TRUE	igd	NA	NA	NA	NA	NA	NA	NA	12	24107019	2.19999e-07	450765	0.00103072	ukb-b-6519	TRUE	reported	igd	2	TRUE
Worrier / anxious feelings	rs496778	T	C	T	C	-0.0051539	-0.0719	0.291823	0.2745	FALSE	FALSE	FALSE	finn-b-I9_ICH	1	28540221	0.0394	NA	0.0679	Intracerebral haemmorrhage || id:finn-b-I9_ICH	Intracerebral haemmorrhage	Intracerebral haemmorrhage || ||	TRUE	igd	NA	NA	NA	NA	NA	NA	NA	1	28540221	4.70002e-06	450765	0.00112548	ukb-b-6519	TRUE	reported	igd	2	TRUE
Worrier / anxious feelings	rs55731231	G	C	G	C	0.00801222	-0.0065	0.224806	0.2042	FALSE	TRUE	FALSE	finn-b-I9_ICH	18	35183274	0.0435	NA	0.8806	Intracerebral haemmorrhage || id:finn-b-I9_ICH	Intracerebral haemmorrhage	Intracerebral haemmorrhage || ||	TRUE	igd	NA	NA	NA	NA	NA	NA	NA	18	35183274	7.89951e-11	450765	0.00123221	ukb-b-6519	TRUE	reported	igd	2	TRUE
Worrier / anxious feelings	rs55775285	G	A	G	A	-0.0049112	0.0328	0.428194	0.384	FALSE	FALSE	FALSE	finn-b-I9_ICH	17	80534883	0.0361	NA	0.3637	Intracerebral haemmorrhage || id:finn-b-I9_ICH	Intracerebral haemmorrhage	Intracerebral haemmorrhage || ||	TRUE	igd	NA	NA	NA	NA	NA	NA	NA	17	80534883	2.30001e-06	450765	0.00103911	ukb-b-6519	TRUE	reported	igd	2	TRUE
Worrier / anxious feelings	rs55997507	C	G	C	G	0.00694102	-0.049	0.609043	0.6779	FALSE	TRUE	FALSE	finn-b-I9_ICH	16	7666664	0.0377	NA	0.194	Intracerebral haemmorrhage || id:finn-b-I9_ICH	Intracerebral haemmorrhage	Intracerebral haemmorrhage || ||	TRUE	igd	NA	NA	NA	NA	NA	NA	NA	16	7666664	5.79963e-11	450765	0.00105979	ukb-b-6519	TRUE	reported	igd	2	TRUE
Worrier / anxious feelings	rs57462170	A	G	A	G	0.00923873	-0.0446	0.108755	0.1414	FALSE	FALSE	FALSE	finn-b-I9_ICH	3	50239803	0.0506	NA	0.378	Intracerebral haemmorrhage || id:finn-b-I9_ICH	Intracerebral haemmorrhage	Intracerebral haemmorrhage || ||	TRUE	igd	NA	NA	NA	NA	NA	NA	NA	3	50239803	2.1e-08	450765	0.00164857	ukb-b-6519	TRUE	reported	igd	2	TRUE
Worrier / anxious feelings	rs5767858	A	G	A	G	0.00490391	-0.0402	0.407831	0.3969	FALSE	FALSE	FALSE	finn-b-I9_ICH	22	48033333	0.0359	NA	0.2626	Intracerebral haemmorrhage || id:finn-b-I9_ICH	Intracerebral haemmorrhage	Intracerebral haemmorrhage || ||	TRUE	igd	NA	NA	NA	NA	NA	NA	NA	22	48033333	2.80001e-06	450765	0.00104619	ukb-b-6519	TRUE	reported	igd	2	TRUE
Worrier / anxious feelings	rs5848	T	C	T	C	-0.00531976	-0.0672	0.279714	0.3445	FALSE	FALSE	FALSE	finn-b-I9_ICH	17	42430244	0.0371	NA	0.0702199	Intracerebral haemmorrhage || id:finn-b-I9_ICH	Intracerebral haemmorrhage	Intracerebral haemmorrhage || ||	TRUE	igd	NA	NA	NA	NA	NA	NA	NA	17	42430244	4.30002e-06	450765	0.00115773	ukb-b-6519	TRUE	reported	igd	2	TRUE
Worrier / anxious feelings	rs58974906	C	T	C	T	-0.00790121	0.0081	0.110584	0.1291	FALSE	FALSE	FALSE	finn-b-I9_ICH	7	114933224	0.0525	NA	0.8769	Intracerebral haemmorrhage || id:finn-b-I9_ICH	Intracerebral haemmorrhage	Intracerebral haemmorrhage || ||	TRUE	igd	NA	NA	NA	NA	NA	NA	NA	7	114933224	1.40001e-06	450765	0.00163586	ukb-b-6519	TRUE	reported	igd	2	TRUE
Worrier / anxious feelings	rs6073003	C	A	C	A	0.00702327	0.0109	0.161879	0.26	FALSE	FALSE	FALSE	finn-b-I9_ICH	20	41781599	0.04	NA	0.784701	Intracerebral haemmorrhage || id:finn-b-I9_ICH	Intracerebral haemmorrhage	Intracerebral haemmorrhage || ||	TRUE	igd	NA	NA	NA	NA	NA	NA	NA	20	41781599	5.49997e-07	450765	0.00140229	ukb-b-6519	TRUE	reported	igd	2	TRUE
Worrier / anxious feelings	rs6081247	T	A	T	A	-0.00639296	-0.0625	0.383167	0.3959	FALSE	TRUE	FALSE	finn-b-I9_ICH	20	18596234	0.0359	NA	0.0818597	Intracerebral haemmorrhage || id:finn-b-I9_ICH	Intracerebral haemmorrhage	Intracerebral haemmorrhage || ||	TRUE	igd	NA	NA	NA	NA	NA	NA	NA	20	18596234	1.29999e-09	450765	0.00105388	ukb-b-6519	TRUE	reported	igd	2	TRUE
Worrier / anxious feelings	rs61988381	A	C	A	C	0.00554637	0.0529	0.293818	0.2058	FALSE	FALSE	FALSE	finn-b-I9_ICH	14	42258296	0.0436	NA	0.2244	Intracerebral haemmorrhage || id:finn-b-I9_ICH	Intracerebral haemmorrhage	Intracerebral haemmorrhage || ||	TRUE	igd	NA	NA	NA	NA	NA	NA	NA	14	42258296	8.19993e-07	450765	0.00112497	ukb-b-6519	TRUE	reported	igd	2	TRUE
Worrier / anxious feelings	rs62208366	A	G	A	G	0.0051842	-0.0128	0.404985	0.2495	FALSE	FALSE	FALSE	finn-b-I9_ICH	20	36282458	0.0406	NA	0.7519	Intracerebral haemmorrhage || id:finn-b-I9_ICH	Intracerebral haemmorrhage	Intracerebral haemmorrhage || ||	TRUE	igd	NA	NA	NA	NA	NA	NA	NA	20	36282458	8e-07	450765	0.00105026	ukb-b-6519	TRUE	reported	igd	2	TRUE
Worrier / anxious feelings	rs62250713	G	A	G	A	0.0100107	-0.0894	0.636114	0.7189	FALSE	FALSE	FALSE	finn-b-I9_ICH	3	85513793	0.039	NA	0.0220602	Intracerebral haemmorrhage || id:finn-b-I9_ICH	Intracerebral haemmorrhage	Intracerebral haemmorrhage || ||	TRUE	igd	NA	NA	NA	NA	NA	NA	NA	3	85513793	5.79963e-21	450765	0.00106568	ukb-b-6519	TRUE	reported	igd	2	TRUE
Worrier / anxious feelings	rs62255226	G	C	G	C	-0.010145	-0.1694	0.064038	0.04433	FALSE	TRUE	FALSE	finn-b-I9_ICH	3	96188572	0.0857	NA	0.0481604	Intracerebral haemmorrhage || id:finn-b-I9_ICH	Intracerebral haemmorrhage	Intracerebral haemmorrhage || ||	TRUE	igd	NA	NA	NA	NA	NA	NA	NA	3	96188572	1.29999e-06	450765	0.00209398	ukb-b-6519	TRUE	reported	igd	2	TRUE
Worrier / anxious feelings	rs62387979	T	C	T	C	-0.00869186	-0.1088	0.084458	0.07873	FALSE	FALSE	FALSE	finn-b-I9_ICH	5	157320013	0.0659	NA	0.0986007	Intracerebral haemmorrhage || id:finn-b-I9_ICH	Intracerebral haemmorrhage	Intracerebral haemmorrhage || ||	TRUE	igd	NA	NA	NA	NA	NA	NA	NA	5	157320013	2.90001e-06	450765	0.00185738	ukb-b-6519	TRUE	reported	igd	2	TRUE
Worrier / anxious feelings	rs62568582	T	C	T	C	-0.0159112	0.0262	0.026733	0.02645	FALSE	FALSE	FALSE	finn-b-I9_ICH	9	109600191	0.1108	NA	0.8131	Intracerebral haemmorrhage || id:finn-b-I9_ICH	Intracerebral haemmorrhage	Intracerebral haemmorrhage || ||	TRUE	igd	NA	NA	NA	NA	NA	NA	NA	9	109600191	5.49997e-07	450765	0.00317703	ukb-b-6519	TRUE	reported	igd	2	TRUE
Worrier / anxious feelings	rs6439649	T	G	T	G	0.00781929	-0.0001	0.601407	0.4611	FALSE	FALSE	FALSE	finn-b-I9_ICH	3	136371691	0.0353	NA	0.9968	Intracerebral haemmorrhage || id:finn-b-I9_ICH	Intracerebral haemmorrhage	Intracerebral haemmorrhage || ||	TRUE	igd	NA	NA	NA	NA	NA	NA	NA	3	136371691	7.50067e-14	450765	0.00104552	ukb-b-6519	TRUE	reported	igd	2	TRUE
Worrier / anxious feelings	rs6463656	T	C	T	C	0.00573047	-0.006	0.414618	0.5085	FALSE	FALSE	FALSE	finn-b-I9_ICH	7	7244181	0.0352	NA	0.8641	Intracerebral haemmorrhage || id:finn-b-I9_ICH	Intracerebral haemmorrhage	Intracerebral haemmorrhage || ||	TRUE	igd	NA	NA	NA	NA	NA	NA	NA	7	7244181	4e-08	450765	0.00104375	ukb-b-6519	TRUE	reported	igd	2	TRUE
Worrier / anxious feelings	rs654351	C	G	C	G	0.00502637	0.0585	0.580092	0.6395	FALSE	TRUE	FALSE	finn-b-I9_ICH	6	10415006	0.037	NA	0.1141	Intracerebral haemmorrhage || id:finn-b-I9_ICH	Intracerebral haemmorrhage	Intracerebral haemmorrhage || ||	TRUE	igd	NA	NA	NA	NA	NA	NA	NA	6	10415006	2.90001e-06	450765	0.00107382	ukb-b-6519	TRUE	reported	igd	2	TRUE
Worrier / anxious feelings	rs66960328	G	T	G	T	0.00703655	-0.0016	0.164502	0.192	FALSE	FALSE	FALSE	finn-b-I9_ICH	3	61143759	0.0446	NA	0.9721	Intracerebral haemmorrhage || id:finn-b-I9_ICH	Intracerebral haemmorrhage	Intracerebral haemmorrhage || ||	TRUE	igd	NA	NA	NA	NA	NA	NA	NA	3	61143759	4e-07	450765	0.00138761	ukb-b-6519	TRUE	reported	igd	2	TRUE
Worrier / anxious feelings	rs7034482	A	G	A	G	-0.00596859	-0.0748	0.718985	0.8051	FALSE	FALSE	FALSE	finn-b-I9_ICH	9	120500533	0.0448	NA	0.0949708	Intracerebral haemmorrhage || id:finn-b-I9_ICH	Intracerebral haemmorrhage	Intracerebral haemmorrhage || ||	TRUE	igd	NA	NA	NA	NA	NA	NA	NA	9	120500533	1.79999e-07	450765	0.0011441	ukb-b-6519	TRUE	reported	igd	2	TRUE
Worrier / anxious feelings	rs7043325	G	A	G	A	-0.00637738	-0.0126	0.517753	0.453	FALSE	FALSE	FALSE	finn-b-I9_ICH	9	85690551	0.0354	NA	0.7224	Intracerebral haemmorrhage || id:finn-b-I9_ICH	Intracerebral haemmorrhage	Intracerebral haemmorrhage || ||	TRUE	igd	NA	NA	NA	NA	NA	NA	NA	9	85690551	6.69993e-10	450765	0.0010332	ukb-b-6519	TRUE	reported	igd	2	TRUE
Worrier / anxious feelings	rs7183547	C	T	C	T	0.00605691	0.0299	0.537691	0.5104	FALSE	FALSE	FALSE	finn-b-I9_ICH	15	46428976	0.0351	NA	0.3948	Intracerebral haemmorrhage || id:finn-b-I9_ICH	Intracerebral haemmorrhage	Intracerebral haemmorrhage || ||	TRUE	igd	NA	NA	NA	NA	NA	NA	NA	15	46428976	3.79997e-09	450765	0.00102796	ukb-b-6519	TRUE	reported	igd	2	TRUE
Worrier / anxious feelings	rs7202206	G	T	G	T	-0.00573505	0.0646	0.607449	0.6487	FALSE	FALSE	FALSE	finn-b-I9_ICH	16	59395460	0.0369	NA	0.0802805	Intracerebral haemmorrhage || id:finn-b-I9_ICH	Intracerebral haemmorrhage	Intracerebral haemmorrhage || ||	TRUE	igd	NA	NA	NA	NA	NA	NA	NA	16	59395460	5e-08	450765	0.00105177	ukb-b-6519	TRUE	reported	igd	2	TRUE
Worrier / anxious feelings	rs7220480	G	A	G	A	-0.00521877	0.0605	0.348691	0.4143	FALSE	FALSE	FALSE	finn-b-I9_ICH	17	64686679	0.0357	NA	0.0901509	Intracerebral haemmorrhage || id:finn-b-I9_ICH	Intracerebral haemmorrhage	Intracerebral haemmorrhage || ||	TRUE	igd	NA	NA	NA	NA	NA	NA	NA	17	64686679	1.40001e-06	450765	0.00108271	ukb-b-6519	TRUE	reported	igd	2	TRUE
Worrier / anxious feelings	rs7305099	G	T	G	T	-0.00532465	-0.0252	0.613552	0.7095	FALSE	FALSE	FALSE	finn-b-I9_ICH	12	975276	0.0386	NA	0.5138	Intracerebral haemmorrhage || id:finn-b-I9_ICH	Intracerebral haemmorrhage	Intracerebral haemmorrhage || ||	TRUE	igd	NA	NA	NA	NA	NA	NA	NA	12	975276	4.79999e-07	450765	0.00105737	ukb-b-6519	TRUE	reported	igd	2	TRUE
Worrier / anxious feelings	rs74162159	T	G	T	G	-0.00936576	0.0389	0.069866	0.04406	FALSE	FALSE	FALSE	finn-b-I9_ICH	10	131270486	0.0872	NA	0.6555	Intracerebral haemmorrhage || id:finn-b-I9_ICH	Intracerebral haemmorrhage	Intracerebral haemmorrhage || ||	TRUE	igd	NA	NA	NA	NA	NA	NA	NA	10	131270486	3.89996e-06	450765	0.00202868	ukb-b-6519	TRUE	reported	igd	2	TRUE
Worrier / anxious feelings	rs74376588	C	T	C	T	-0.0132527	0.0092	0.042192	0.06308	FALSE	FALSE	FALSE	finn-b-I9_ICH	2	153915461	0.0734	NA	0.8998	Intracerebral haemmorrhage || id:finn-b-I9_ICH	Intracerebral haemmorrhage	Intracerebral haemmorrhage || ||	TRUE	igd	NA	NA	NA	NA	NA	NA	NA	2	153915461	3.50002e-07	450765	0.00260281	ukb-b-6519	TRUE	reported	igd	2	TRUE
Worrier / anxious feelings	rs75051825	T	C	T	C	-0.00675439	-0.0834	0.151188	0.1462	FALSE	FALSE	FALSE	finn-b-I9_ICH	10	125109647	0.0498	NA	0.0936699	Intracerebral haemmorrhage || id:finn-b-I9_ICH	Intracerebral haemmorrhage	Intracerebral haemmorrhage || ||	TRUE	igd	NA	NA	NA	NA	NA	NA	NA	10	125109647	2.69998e-06	450765	0.00143864	ukb-b-6519	TRUE	reported	igd	2	TRUE
Worrier / anxious feelings	rs75074681	G	T	G	T	-0.0178664	-0.0201	0.021646	0.04219	FALSE	FALSE	FALSE	finn-b-I9_ICH	3	34426124	0.0877	NA	0.8186	Intracerebral haemmorrhage || id:finn-b-I9_ICH	Intracerebral haemmorrhage	Intracerebral haemmorrhage || ||	TRUE	igd	NA	NA	NA	NA	NA	NA	NA	3	34426124	4.70002e-07	450765	0.00354707	ukb-b-6519	TRUE	reported	igd	2	TRUE
Worrier / anxious feelings	rs7523945	C	T	C	T	0.00556998	0.0647	0.35955	0.3439	FALSE	FALSE	FALSE	finn-b-I9_ICH	1	226783339	0.037	NA	0.0806195	Intracerebral haemmorrhage || id:finn-b-I9_ICH	Intracerebral haemmorrhage	Intracerebral haemmorrhage || ||	TRUE	igd	NA	NA	NA	NA	NA	NA	NA	1	226783339	2.1e-07	450765	0.00107324	ukb-b-6519	TRUE	reported	igd	2	TRUE
Worrier / anxious feelings	rs7567451	T	G	T	G	0.00630653	0.0393	0.730651	0.7405	FALSE	FALSE	FALSE	finn-b-I9_ICH	2	157053380	0.0402	NA	0.3285	Intracerebral haemmorrhage || id:finn-b-I9_ICH	Intracerebral haemmorrhage	Intracerebral haemmorrhage || ||	TRUE	igd	NA	NA	NA	NA	NA	NA	NA	2	157053380	4.90004e-08	450765	0.00115647	ukb-b-6519	TRUE	reported	igd	2	TRUE
Worrier / anxious feelings	rs7605378	C	A	C	A	-0.00528487	-0.0731	0.68969	0.5967	FALSE	FALSE	FALSE	finn-b-I9_ICH	2	200676926	0.0358	NA	0.0412401	Intracerebral haemmorrhage || id:finn-b-I9_ICH	Intracerebral haemmorrhage	Intracerebral haemmorrhage || ||	TRUE	igd	NA	NA	NA	NA	NA	NA	NA	2	200676926	1.79999e-06	450765	0.00110812	ukb-b-6519	TRUE	reported	igd	2	TRUE
Worrier / anxious feelings	rs7617779	G	A	G	A	-0.00586143	-0.0029	0.27115	0.3049	FALSE	FALSE	FALSE	finn-b-I9_ICH	3	17045586	0.0382	NA	0.94	Intracerebral haemmorrhage || id:finn-b-I9_ICH	Intracerebral haemmorrhage	Intracerebral haemmorrhage || ||	TRUE	igd	NA	NA	NA	NA	NA	NA	NA	3	17045586	3.79997e-07	450765	0.00115367	ukb-b-6519	TRUE	reported	igd	2	TRUE
Worrier / anxious feelings	rs76183790	T	C	T	C	0.0125111	0.018	0.042539	0.008499	FALSE	FALSE	FALSE	finn-b-I9_ICH	19	31587513	0.2	NA	0.9282	Intracerebral haemmorrhage || id:finn-b-I9_ICH	Intracerebral haemmorrhage	Intracerebral haemmorrhage || ||	TRUE	igd	NA	NA	NA	NA	NA	NA	NA	19	31587513	1.7e-06	450765	0.00261341	ukb-b-6519	TRUE	reported	igd	2	TRUE
Worrier / anxious feelings	rs7669243	A	T	A	T	-0.00790126	0.0306	0.845114	0.8141	FALSE	TRUE	FALSE	finn-b-I9_ICH	4	119272813	0.0451	NA	0.4985	Intracerebral haemmorrhage || id:finn-b-I9_ICH	Intracerebral haemmorrhage	Intracerebral haemmorrhage || ||	TRUE	igd	NA	NA	NA	NA	NA	NA	NA	4	119272813	2.5e-08	450765	0.00141843	ukb-b-6519	TRUE	reported	igd	2	TRUE
Worrier / anxious feelings	rs7714093	C	T	C	T	0.00523447	0.0535	0.6478	0.6108	FALSE	FALSE	FALSE	finn-b-I9_ICH	5	109402835	0.0361	NA	0.138	Intracerebral haemmorrhage || id:finn-b-I9_ICH	Intracerebral haemmorrhage	Intracerebral haemmorrhage || ||	TRUE	igd	NA	NA	NA	NA	NA	NA	NA	5	109402835	1.09999e-06	450765	0.00107509	ukb-b-6519	TRUE	reported	igd	2	TRUE
Worrier / anxious feelings	rs7738215	C	T	C	T	-0.00502481	0.0675	0.568992	0.569	FALSE	FALSE	FALSE	finn-b-I9_ICH	6	55041811	0.0356	NA	0.0578402	Intracerebral haemmorrhage || id:finn-b-I9_ICH	Intracerebral haemmorrhage	Intracerebral haemmorrhage || ||	TRUE	igd	NA	NA	NA	NA	NA	NA	NA	6	55041811	1.29999e-06	450765	0.00103784	ukb-b-6519	TRUE	reported	igd	2	TRUE
Worrier / anxious feelings	rs77517827	T	C	T	C	-0.00958291	0.0932	0.067601	0.02455	FALSE	FALSE	FALSE	finn-b-I9_ICH	5	116925752	0.1149	NA	0.4175	Intracerebral haemmorrhage || id:finn-b-I9_ICH	Intracerebral haemmorrhage	Intracerebral haemmorrhage || ||	TRUE	igd	NA	NA	NA	NA	NA	NA	NA	5	116925752	2.80001e-06	450765	0.00204608	ukb-b-6519	TRUE	reported	igd	2	TRUE
Worrier / anxious feelings	rs77804065	T	C	T	C	0.00812236	-0.0031	0.225027	0.1057	FALSE	FALSE	FALSE	finn-b-I9_ICH	17	43810896	0.0579	NA	0.9578	Intracerebral haemmorrhage || id:finn-b-I9_ICH	Intracerebral haemmorrhage	Intracerebral haemmorrhage || ||	TRUE	igd	NA	NA	NA	NA	NA	NA	NA	17	43810896	5.10035e-11	450765	0.00123652	ukb-b-6519	TRUE	reported	igd	2	TRUE
Worrier / anxious feelings	rs7797144	A	G	A	G	0.00564076	-0.0101	0.693482	0.6912	FALSE	FALSE	FALSE	finn-b-I9_ICH	7	140903618	0.0379	NA	0.7906	Intracerebral haemmorrhage || id:finn-b-I9_ICH	Intracerebral haemmorrhage	Intracerebral haemmorrhage || ||	TRUE	igd	NA	NA	NA	NA	NA	NA	NA	7	140903618	4.09996e-07	450765	0.00111388	ukb-b-6519	TRUE	reported	igd	2	TRUE
Worrier / anxious feelings	rs7864396	C	A	C	A	-0.00538036	0.0516	0.358764	0.3893	FALSE	FALSE	FALSE	finn-b-I9_ICH	9	96251318	0.036	NA	0.1514	Intracerebral haemmorrhage || id:finn-b-I9_ICH	Intracerebral haemmorrhage	Intracerebral haemmorrhage || ||	TRUE	igd	NA	NA	NA	NA	NA	NA	NA	9	96251318	5.30005e-07	450765	0.00107258	ukb-b-6519	TRUE	reported	igd	2	TRUE
Worrier / anxious feelings	rs78677597	C	A	C	A	-0.00643708	0.0572	0.244345	0.2088	FALSE	FALSE	FALSE	finn-b-I9_ICH	6	100610044	0.0435	NA	0.1879	Intracerebral haemmorrhage || id:finn-b-I9_ICH	Intracerebral haemmorrhage	Intracerebral haemmorrhage || ||	TRUE	igd	NA	NA	NA	NA	NA	NA	NA	6	100610044	7.10003e-08	450765	0.00119465	ukb-b-6519	TRUE	reported	igd	2	TRUE
Worrier / anxious feelings	rs7871715	T	C	T	C	-0.00921304	0.1092	0.097498	0.1011	FALSE	FALSE	FALSE	finn-b-I9_ICH	9	129436376	0.0586	NA	0.0626498	Intracerebral haemmorrhage || id:finn-b-I9_ICH	Intracerebral haemmorrhage	Intracerebral haemmorrhage || ||	TRUE	igd	NA	NA	NA	NA	NA	NA	NA	9	129436376	1e-07	450765	0.00173064	ukb-b-6519	TRUE	reported	igd	2	TRUE
Worrier / anxious feelings	rs78933533	A	G	A	G	-0.0127125	0.0578	0.06571	0.0417	FALSE	FALSE	FALSE	finn-b-I9_ICH	6	32604198	0.0877	NA	0.5098	Intracerebral haemmorrhage || id:finn-b-I9_ICH	Intracerebral haemmorrhage	Intracerebral haemmorrhage || ||	TRUE	igd	NA	NA	NA	NA	NA	NA	NA	6	32604198	3.89996e-06	450765	0.00275358	ukb-b-6519	TRUE	reported	igd	2	TRUE
Worrier / anxious feelings	rs7912117	C	T	C	T	-0.00826142	0.03	0.874987	0.8354	FALSE	FALSE	FALSE	finn-b-I9_ICH	10	63824818	0.0475	NA	0.5273	Intracerebral haemmorrhage || id:finn-b-I9_ICH	Intracerebral haemmorrhage	Intracerebral haemmorrhage || ||	TRUE	igd	NA	NA	NA	NA	NA	NA	NA	10	63824818	1.29999e-07	450765	0.00156295	ukb-b-6519	TRUE	reported	igd	2	TRUE
Worrier / anxious feelings	rs7935825	A	T	A	T	0.00639739	-0.0351	0.237381	0.338	FALSE	TRUE	FALSE	finn-b-I9_ICH	11	73500096	0.0371	NA	0.3447	Intracerebral haemmorrhage || id:finn-b-I9_ICH	Intracerebral haemmorrhage	Intracerebral haemmorrhage || ||	TRUE	igd	NA	NA	NA	NA	NA	NA	NA	11	73500096	1.2e-07	450765	0.00120726	ukb-b-6519	TRUE	reported	igd	2	TRUE
Worrier / anxious feelings	rs7946598	C	T	C	T	0.00524806	-0.0142	0.669047	0.6349	FALSE	FALSE	FALSE	finn-b-I9_ICH	11	67506743	0.0369	NA	0.6997	Intracerebral haemmorrhage || id:finn-b-I9_ICH	Intracerebral haemmorrhage	Intracerebral haemmorrhage || ||	TRUE	igd	TRUE	rs7946598	rs11227914	T	C	T	C	11	67502676	2.19999e-06	450765	0.00110822	ukb-b-6519	TRUE	reported	igd	2	TRUE
Worrier / anxious feelings	rs7963954	G	A	G	A	0.00650423	0.0161	0.189489	0.2118	FALSE	FALSE	FALSE	finn-b-I9_ICH	12	50064928	0.0433	NA	0.7103	Intracerebral haemmorrhage || id:finn-b-I9_ICH	Intracerebral haemmorrhage	Intracerebral haemmorrhage || ||	TRUE	igd	NA	NA	NA	NA	NA	NA	NA	12	50064928	7.49998e-07	450765	0.00131436	ukb-b-6519	TRUE	reported	igd	2	TRUE
Worrier / anxious feelings	rs8045843	G	C	G	C	-0.00609699	-0.0169	0.776326	0.7744	FALSE	TRUE	FALSE	finn-b-I9_ICH	16	87444694	0.0421	NA	0.6878	Intracerebral haemmorrhage || id:finn-b-I9_ICH	Intracerebral haemmorrhage	Intracerebral haemmorrhage || ||	TRUE	igd	NA	NA	NA	NA	NA	NA	NA	16	87444694	7.10003e-07	450765	0.00122935	ukb-b-6519	TRUE	reported	igd	2	TRUE
Worrier / anxious feelings	rs882193	A	G	A	G	-0.00591997	-0.0145	0.616121	0.6391	FALSE	FALSE	FALSE	finn-b-I9_ICH	12	2350620	0.037	NA	0.695401	Intracerebral haemmorrhage || id:finn-b-I9_ICH	Intracerebral haemmorrhage	Intracerebral haemmorrhage || ||	TRUE	igd	NA	NA	NA	NA	NA	NA	NA	12	2350620	3.59998e-08	450765	0.00107464	ukb-b-6519	TRUE	reported	igd	2	TRUE
Worrier / anxious feelings	rs886827	T	C	T	C	0.00565417	0.0258	0.689035	0.7731	FALSE	FALSE	FALSE	finn-b-I9_ICH	7	42319056	0.0426	NA	0.5452	Intracerebral haemmorrhage || id:finn-b-I9_ICH	Intracerebral haemmorrhage	Intracerebral haemmorrhage || ||	TRUE	igd	NA	NA	NA	NA	NA	NA	NA	7	42319056	1.5e-06	450765	0.0011741	ukb-b-6519	TRUE	reported	igd	2	TRUE
Worrier / anxious feelings	rs903067	A	G	A	G	-0.00535893	0.03	0.569957	0.6164	FALSE	FALSE	FALSE	finn-b-I9_ICH	12	58011857	0.0361	NA	0.4065	Intracerebral haemmorrhage || id:finn-b-I9_ICH	Intracerebral haemmorrhage	Intracerebral haemmorrhage || ||	TRUE	igd	NA	NA	NA	NA	NA	NA	NA	12	58011857	2.19999e-07	450765	0.00103466	ukb-b-6519	TRUE	reported	igd	2	TRUE
Worrier / anxious feelings	rs922140	G	A	G	A	0.00610783	0.022	0.601726	0.6926	FALSE	FALSE	FALSE	finn-b-I9_ICH	5	122088890	0.0382	NA	0.5642	Intracerebral haemmorrhage || id:finn-b-I9_ICH	Intracerebral haemmorrhage	Intracerebral haemmorrhage || ||	TRUE	igd	NA	NA	NA	NA	NA	NA	NA	5	122088890	5.49997e-09	450765	0.0010475	ukb-b-6519	TRUE	reported	igd	2	TRUE
Worrier / anxious feelings	rs9271657	C	T	C	T	-0.00723849	-0.0924	0.215704	0.2953	FALSE	FALSE	FALSE	finn-b-I9_ICH	6	32593051	0.0432	NA	0.0325297	Intracerebral haemmorrhage || id:finn-b-I9_ICH	Intracerebral haemmorrhage	Intracerebral haemmorrhage || ||	TRUE	igd	TRUE	rs9271657	rs9271694	C	T	C	T	6	32592582	2.80001e-08	450765	0.00130341	ukb-b-6519	TRUE	reported	igd	2	TRUE
Worrier / anxious feelings	rs9350100	C	T	C	T	-0.00598519	0.0214	0.198399	0.1795	FALSE	FALSE	FALSE	finn-b-I9_ICH	6	19076417	0.0461	NA	0.642401	Intracerebral haemmorrhage || id:finn-b-I9_ICH	Intracerebral haemmorrhage	Intracerebral haemmorrhage || ||	TRUE	igd	NA	NA	NA	NA	NA	NA	NA	6	19076417	3.40001e-06	450765	0.0012883	ukb-b-6519	TRUE	reported	igd	2	TRUE
Worrier / anxious feelings	rs9384069	G	T	G	T	-0.00767885	-0.0121	0.175339	0.3348	FALSE	FALSE	FALSE	finn-b-I9_ICH	6	153370902	0.0372	NA	0.7452	Intracerebral haemmorrhage || id:finn-b-I9_ICH	Intracerebral haemmorrhage	Intracerebral haemmorrhage || ||	TRUE	igd	NA	NA	NA	NA	NA	NA	NA	6	153370902	5.1e-07	450765	0.00152898	ukb-b-6519	TRUE	reported	igd	2	TRUE
Worrier / anxious feelings	rs9406545	G	A	G	A	-0.00485705	0.0446	0.552005	0.5052	FALSE	FALSE	FALSE	finn-b-I9_ICH	9	15839830	0.0352	NA	0.2053	Intracerebral haemmorrhage || id:finn-b-I9_ICH	Intracerebral haemmorrhage	Intracerebral haemmorrhage || ||	TRUE	igd	NA	NA	NA	NA	NA	NA	NA	9	15839830	2.69998e-06	450765	0.00103476	ukb-b-6519	TRUE	reported	igd	2	TRUE
Worrier / anxious feelings	rs9524410	G	A	G	A	-0.00564993	-0.0353	0.483079	0.5057	FALSE	FALSE	FALSE	finn-b-I9_ICH	13	94945685	0.0353	NA	0.3169	Intracerebral haemmorrhage || id:finn-b-I9_ICH	Intracerebral haemmorrhage	Intracerebral haemmorrhage || ||	TRUE	igd	NA	NA	NA	NA	NA	NA	NA	13	94945685	4.30002e-08	450765	0.00103171	ukb-b-6519	TRUE	reported	igd	2	TRUE
Worrier / anxious feelings	rs953442	C	T	C	T	-0.00777617	-0.0716	0.24708	0.1922	FALSE	FALSE	FALSE	finn-b-I9_ICH	18	57797485	0.0446	NA	0.1085	Intracerebral haemmorrhage || id:finn-b-I9_ICH	Intracerebral haemmorrhage	Intracerebral haemmorrhage || ||	TRUE	igd	NA	NA	NA	NA	NA	NA	NA	18	57797485	7.89951e-11	450765	0.00119575	ukb-b-6519	TRUE	reported	igd	2	TRUE
Worrier / anxious feelings	rs966311	G	A	G	A	-0.00504113	0.0049	0.652054	0.7285	FALSE	FALSE	FALSE	finn-b-I9_ICH	4	14967266	0.0394	NA	0.9016	Intracerebral haemmorrhage || id:finn-b-I9_ICH	Intracerebral haemmorrhage	Intracerebral haemmorrhage || ||	TRUE	igd	NA	NA	NA	NA	NA	NA	NA	4	14967266	3.09999e-06	450765	0.00108105	ukb-b-6519	TRUE	reported	igd	2	TRUE
Worrier / anxious feelings	rs9811585	G	T	G	T	0.00733612	-0.0583	0.380805	0.2952	FALSE	FALSE	FALSE	finn-b-I9_ICH	3	35724596	0.0386	NA	0.1306	Intracerebral haemmorrhage || id:finn-b-I9_ICH	Intracerebral haemmorrhage	Intracerebral haemmorrhage || ||	TRUE	igd	NA	NA	NA	NA	NA	NA	NA	3	35724596	3.80014e-12	450765	0.00105656	ukb-b-6519	TRUE	reported	igd	2	TRUE
Worrier / anxious feelings	rs9881352	A	G	A	G	-0.0049188	0.0232	0.438614	0.5626	FALSE	FALSE	FALSE	finn-b-I9_ICH	3	4947256	0.0354	NA	0.5117	Intracerebral haemmorrhage || id:finn-b-I9_ICH	Intracerebral haemmorrhage	Intracerebral haemmorrhage || ||	TRUE	igd	NA	NA	NA	NA	NA	NA	NA	3	4947256	2.1e-06	450765	0.00103792	ukb-b-6519	TRUE	reported	igd	2	TRUE
Worrier / anxious feelings	rs9917256	A	G	A	G	-0.00747704	-0.0043	0.118663	0.1586	FALSE	FALSE	FALSE	finn-b-I9_ICH	2	169143035	0.0482	NA	0.9292	Intracerebral haemmorrhage || id:finn-b-I9_ICH	Intracerebral haemmorrhage	Intracerebral haemmorrhage || ||	TRUE	igd	NA	NA	NA	NA	NA	NA	NA	2	169143035	2.30001e-06	450765	0.00158193	ukb-b-6519	TRUE	reported	igd	2	TRUE
Nervous feelings	rs10034259	C	A	C	A	-0.00644975	-0.0125	0.20039	0.2061	FALSE	FALSE	FALSE	finn-b-I9_ICH	4	104933753	0.0437	NA	0.7739	Intracerebral haemmorrhage || id:finn-b-I9_ICH	Intracerebral haemmorrhage	Intracerebral haemmorrhage || ||	TRUE	igd	NA	NA	NA	NA	NA	NA	NA	4	104933753	7.69999e-09	450700	0.00111684	ukb-b-20544	TRUE	reported	igd	2	TRUE
Nervous feelings	rs10152595	G	C	G	C	0.00594133	-0.0226	0.249675	0.235	FALSE	TRUE	FALSE	finn-b-I9_ICH	15	67475488	0.0419	NA	0.589299	Intracerebral haemmorrhage || id:finn-b-I9_ICH	Intracerebral haemmorrhage	Intracerebral haemmorrhage || ||	TRUE	igd	NA	NA	NA	NA	NA	NA	NA	15	67475488	9.40005e-09	450700	0.00103501	ukb-b-20544	TRUE	reported	igd	2	TRUE
Nervous feelings	rs10432168	C	T	C	T	0.00416664	-0.0051	0.551079	0.6003	FALSE	FALSE	FALSE	finn-b-I9_ICH	18	31312106	0.0359	NA	0.8871	Intracerebral haemmorrhage || id:finn-b-I9_ICH	Intracerebral haemmorrhage	Intracerebral haemmorrhage || ||	TRUE	igd	NA	NA	NA	NA	NA	NA	NA	18	31312106	3.29997e-06	450700	0.000895853	ukb-b-20544	TRUE	reported	igd	2	TRUE
Nervous feelings	rs10441755	C	T	C	T	0.00617933	-0.0329	0.278582	0.391	FALSE	FALSE	FALSE	finn-b-I9_ICH	9	126490123	0.036	NA	0.3612	Intracerebral haemmorrhage || id:finn-b-I9_ICH	Intracerebral haemmorrhage	Intracerebral haemmorrhage || ||	TRUE	igd	NA	NA	NA	NA	NA	NA	NA	9	126490123	5.1e-10	450700	0.000993897	ukb-b-20544	TRUE	reported	igd	2	TRUE
Nervous feelings	rs10501320	C	G	C	G	0.00646375	0.0204	0.264391	0.1823	FALSE	TRUE	FALSE	finn-b-I9_ICH	11	47293799	0.0459	NA	0.6569	Intracerebral haemmorrhage || id:finn-b-I9_ICH	Intracerebral haemmorrhage	Intracerebral haemmorrhage || ||	TRUE	igd	NA	NA	NA	NA	NA	NA	NA	11	47293799	1.40001e-10	450700	0.0010078	ukb-b-20544	TRUE	reported	igd	2	TRUE
Nervous feelings	rs1070048	A	C	A	C	-0.00450631	0.0002	0.446262	0.3384	FALSE	FALSE	FALSE	finn-b-I9_ICH	10	120148581	0.0373	NA	0.9949	Intracerebral haemmorrhage || id:finn-b-I9_ICH	Intracerebral haemmorrhage	Intracerebral haemmorrhage || ||	TRUE	igd	NA	NA	NA	NA	NA	NA	NA	10	120148581	5e-07	450700	0.000896259	ukb-b-20544	TRUE	reported	igd	2	TRUE
Nervous feelings	rs10783053	T	C	T	C	0.00562764	-0.045	0.190157	0.1066	FALSE	FALSE	FALSE	finn-b-I9_ICH	1	97473280	0.057	NA	0.4294	Intracerebral haemmorrhage || id:finn-b-I9_ICH	Intracerebral haemmorrhage	Intracerebral haemmorrhage || ||	TRUE	igd	NA	NA	NA	NA	NA	NA	NA	1	97473280	6.80002e-07	450700	0.00113314	ukb-b-20544	TRUE	reported	igd	2	TRUE
Nervous feelings	rs10959968	T	C	T	C	-0.00581609	-0.0216	0.250084	0.1888	FALSE	FALSE	FALSE	finn-b-I9_ICH	9	11585208	0.045	NA	0.632	Intracerebral haemmorrhage || id:finn-b-I9_ICH	Intracerebral haemmorrhage	Intracerebral haemmorrhage || ||	TRUE	igd	NA	NA	NA	NA	NA	NA	NA	9	11585208	1.6e-08	450700	0.00102879	ukb-b-20544	TRUE	reported	igd	2	TRUE
Nervous feelings	rs11064350	T	C	T	C	0.00688121	0.0354	0.116035	0.08278	FALSE	FALSE	FALSE	finn-b-I9_ICH	12	6849355	0.0642	NA	0.5817	Intracerebral haemmorrhage || id:finn-b-I9_ICH	Intracerebral haemmorrhage	Intracerebral haemmorrhage || ||	TRUE	igd	NA	NA	NA	NA	NA	NA	NA	12	6849355	7.69999e-07	450700	0.00139206	ukb-b-20544	TRUE	reported	igd	2	TRUE
Nervous feelings	rs11090045	A	G	A	G	0.00615138	-0.0201	0.307259	0.3453	FALSE	FALSE	FALSE	finn-b-I9_ICH	22	41753603	0.037	NA	0.5866	Intracerebral haemmorrhage || id:finn-b-I9_ICH	Intracerebral haemmorrhage	Intracerebral haemmorrhage || ||	TRUE	igd	NA	NA	NA	NA	NA	NA	NA	22	41753603	2.90001e-10	450700	0.000976098	ukb-b-20544	TRUE	reported	igd	2	TRUE
Nervous feelings	rs11117275	G	C	G	C	0.00655947	-0.0051	0.189167	0.1795	FALSE	TRUE	FALSE	finn-b-I9_ICH	16	87503925	0.0458	NA	0.9115	Intracerebral haemmorrhage || id:finn-b-I9_ICH	Intracerebral haemmorrhage	Intracerebral haemmorrhage || ||	TRUE	igd	NA	NA	NA	NA	NA	NA	NA	16	87503925	7.39997e-09	450700	0.00113474	ukb-b-20544	TRUE	reported	igd	2	TRUE
Nervous feelings	rs11204421	C	T	C	T	0.00461112	0.0186	0.428379	0.3822	FALSE	FALSE	FALSE	finn-b-I9_ICH	17	19897805	0.0361	NA	0.606599	Intracerebral haemmorrhage || id:finn-b-I9_ICH	Intracerebral haemmorrhage	Intracerebral haemmorrhage || ||	TRUE	igd	NA	NA	NA	NA	NA	NA	NA	17	19897805	2.90001e-07	450700	0.000899131	ukb-b-20544	TRUE	reported	igd	2	TRUE
Nervous feelings	rs112726070	T	C	T	C	-0.00552966	-0.0837	0.189725	0.1419	FALSE	FALSE	FALSE	finn-b-I9_ICH	5	80291143	0.0506	NA	0.0982992	Intracerebral haemmorrhage || id:finn-b-I9_ICH	Intracerebral haemmorrhage	Intracerebral haemmorrhage || ||	TRUE	igd	NA	NA	NA	NA	NA	NA	NA	5	80291143	1.29999e-06	450700	0.00114385	ukb-b-20544	TRUE	reported	igd	2	TRUE
Nervous feelings	rs113385887	C	A	C	A	-0.00772528	0.0975	0.10176	0.03895	FALSE	FALSE	FALSE	finn-b-I9_ICH	5	116920610	0.0923	NA	0.2908	Intracerebral haemmorrhage || id:finn-b-I9_ICH	Intracerebral haemmorrhage	Intracerebral haemmorrhage || ||	TRUE	igd	NA	NA	NA	NA	NA	NA	NA	5	116920610	1.6e-07	450700	0.00147401	ukb-b-20544	TRUE	reported	igd	2	TRUE
Nervous feelings	rs113941926	A	G	A	G	0.00753817	-0.0921	0.078602	0.1237	FALSE	FALSE	FALSE	finn-b-I9_ICH	14	47709311	0.0539	NA	0.0875407	Intracerebral haemmorrhage || id:finn-b-I9_ICH	Intracerebral haemmorrhage	Intracerebral haemmorrhage || ||	TRUE	igd	NA	NA	NA	NA	NA	NA	NA	14	47709311	2.90001e-06	450700	0.00161168	ukb-b-20544	TRUE	reported	igd	2	TRUE
Nervous feelings	rs114203485	T	A	T	A	0.012446	0.0072	0.035884	0.03853	FALSE	TRUE	FALSE	finn-b-I9_ICH	4	176692400	0.0923	NA	0.9375	Intracerebral haemmorrhage || id:finn-b-I9_ICH	Intracerebral haemmorrhage	Intracerebral haemmorrhage || ||	TRUE	igd	NA	NA	NA	NA	NA	NA	NA	4	176692400	2.30001e-07	450700	0.00240444	ukb-b-20544	TRUE	reported	igd	2	TRUE
Nervous feelings	rs11574852	C	A	C	A	0.0106939	-0.0829	0.038268	0.01982	FALSE	FALSE	FALSE	finn-b-I9_ICH	10	104161475	0.1256	NA	0.5093	Intracerebral haemmorrhage || id:finn-b-I9_ICH	Intracerebral haemmorrhage	Intracerebral haemmorrhage || ||	TRUE	igd	NA	NA	NA	NA	NA	NA	NA	10	104161475	3.89996e-06	450700	0.00231753	ukb-b-20544	TRUE	reported	igd	2	TRUE
Nervous feelings	rs115962846	G	A	G	A	0.00881022	-0.0579	0.088798	0.03115	FALSE	FALSE	FALSE	finn-b-I9_ICH	2	58967058	0.103	NA	0.5743	Intracerebral haemmorrhage || id:finn-b-I9_ICH	Intracerebral haemmorrhage	Intracerebral haemmorrhage || ||	TRUE	igd	NA	NA	NA	NA	NA	NA	NA	2	58967058	3.40001e-08	450700	0.00159604	ukb-b-20544	TRUE	reported	igd	2	TRUE
Nervous feelings	rs11633354	C	T	C	T	-0.0046401	-0.0157	0.520231	0.51	FALSE	FALSE	FALSE	finn-b-I9_ICH	15	78032357	0.0352	NA	0.6552	Intracerebral haemmorrhage || id:finn-b-I9_ICH	Intracerebral haemmorrhage	Intracerebral haemmorrhage || ||	TRUE	igd	NA	NA	NA	NA	NA	NA	NA	15	78032357	1.89998e-07	450700	0.000890861	ukb-b-20544	TRUE	reported	igd	2	TRUE
Nervous feelings	rs117315088	T	G	T	G	0.0190059	-0.0228	0.012474	0.02396	FALSE	FALSE	FALSE	finn-b-I9_ICH	10	79772969	0.1162	NA	0.8442	Intracerebral haemmorrhage || id:finn-b-I9_ICH	Intracerebral haemmorrhage	Intracerebral haemmorrhage || ||	TRUE	igd	NA	NA	NA	NA	NA	NA	NA	10	79772969	2.80001e-06	450700	0.0040567	ukb-b-20544	TRUE	reported	igd	2	TRUE
Nervous feelings	rs11768309	A	C	A	C	0.00424702	-0.0344	0.535789	0.4768	FALSE	FALSE	FALSE	finn-b-I9_ICH	7	97773812	0.0352	NA	0.3281	Intracerebral haemmorrhage || id:finn-b-I9_ICH	Intracerebral haemmorrhage	Intracerebral haemmorrhage || ||	TRUE	igd	NA	NA	NA	NA	NA	NA	NA	7	97773812	1.79999e-06	450700	0.000890246	ukb-b-20544	TRUE	reported	igd	2	TRUE
Nervous feelings	rs12067700	G	T	G	T	-0.00706859	0.0564	0.218908	0.291	FALSE	FALSE	FALSE	finn-b-I9_ICH	1	98436232	0.0386	NA	0.1446	Intracerebral haemmorrhage || id:finn-b-I9_ICH	Intracerebral haemmorrhage	Intracerebral haemmorrhage || ||	TRUE	igd	NA	NA	NA	NA	NA	NA	NA	1	98436232	5.19996e-11	450700	0.0010766	ukb-b-20544	TRUE	reported	igd	2	TRUE
Nervous feelings	rs12071377	G	A	G	A	0.013374	-0.0417	0.035989	0.05119	FALSE	FALSE	FALSE	finn-b-I9_ICH	1	49258678	0.0791	NA	0.597601	Intracerebral haemmorrhage || id:finn-b-I9_ICH	Intracerebral haemmorrhage	Intracerebral haemmorrhage || ||	TRUE	igd	NA	NA	NA	NA	NA	NA	NA	1	49258678	2.39999e-08	450700	0.00239734	ukb-b-20544	TRUE	reported	igd	2	TRUE
Nervous feelings	rs12203592	T	C	T	C	0.00677243	-0.0841	0.219676	0.03075	FALSE	FALSE	FALSE	finn-b-I9_ICH	6	396321	0.1061	NA	0.4278	Intracerebral haemmorrhage || id:finn-b-I9_ICH	Intracerebral haemmorrhage	Intracerebral haemmorrhage || ||	TRUE	igd	NA	NA	NA	NA	NA	NA	NA	6	396321	1.5e-10	450700	0.00105723	ukb-b-20544	TRUE	reported	igd	2	TRUE
Nervous feelings	rs12243797	T	C	T	C	-0.00577464	-0.0321	0.155246	0.1576	FALSE	FALSE	FALSE	finn-b-I9_ICH	10	15051939	0.0485	NA	0.508	Intracerebral haemmorrhage || id:finn-b-I9_ICH	Intracerebral haemmorrhage	Intracerebral haemmorrhage || ||	TRUE	igd	NA	NA	NA	NA	NA	NA	NA	10	15051939	2.59998e-06	450700	0.00122909	ukb-b-20544	TRUE	reported	igd	2	TRUE
Nervous feelings	rs1227091	C	T	C	T	0.00446196	0.0079	0.347653	0.5128	FALSE	FALSE	FALSE	finn-b-I9_ICH	10	73445707	0.0353	NA	0.8232	Intracerebral haemmorrhage || id:finn-b-I9_ICH	Intracerebral haemmorrhage	Intracerebral haemmorrhage || ||	TRUE	igd	NA	NA	NA	NA	NA	NA	NA	10	73445707	2.1e-06	450700	0.000939958	ukb-b-20544	TRUE	reported	igd	2	TRUE
Nervous feelings	rs12328463	A	G	A	G	-0.00548005	-0.0234	0.657652	0.5826	FALSE	FALSE	FALSE	finn-b-I9_ICH	2	199755743	0.0357	NA	0.5111	Intracerebral haemmorrhage || id:finn-b-I9_ICH	Intracerebral haemmorrhage	Intracerebral haemmorrhage || ||	TRUE	igd	NA	NA	NA	NA	NA	NA	NA	2	199755743	5.1e-09	450700	0.000937906	ukb-b-20544	TRUE	reported	igd	2	TRUE
Nervous feelings	rs12344570	G	A	G	A	0.0040803	0.0078	0.489551	0.4572	FALSE	FALSE	FALSE	finn-b-I9_ICH	9	102591042	0.0354	NA	0.8264	Intracerebral haemmorrhage || id:finn-b-I9_ICH	Intracerebral haemmorrhage	Intracerebral haemmorrhage || ||	TRUE	igd	NA	NA	NA	NA	NA	NA	NA	9	102591042	4.49997e-06	450700	0.000889719	ukb-b-20544	TRUE	reported	igd	2	TRUE
Nervous feelings	rs12479469	A	G	A	G	0.00569279	-0.108	0.342654	0.3741	FALSE	FALSE	FALSE	finn-b-I9_ICH	20	61145196	0.0366	NA	0.00314101	Intracerebral haemmorrhage || id:finn-b-I9_ICH	Intracerebral haemmorrhage	Intracerebral haemmorrhage || ||	TRUE	igd	NA	NA	NA	NA	NA	NA	NA	20	61145196	2.59998e-09	450700	0.000955677	ukb-b-20544	TRUE	reported	igd	2	TRUE
Nervous feelings	rs1250732	C	T	C	T	-0.00696345	0.022	0.127954	0.08128	FALSE	FALSE	FALSE	finn-b-I9_ICH	9	128405675	0.0646	NA	0.7329	Intracerebral haemmorrhage || id:finn-b-I9_ICH	Intracerebral haemmorrhage	Intracerebral haemmorrhage || ||	TRUE	igd	NA	NA	NA	NA	NA	NA	NA	9	128405675	1.7e-07	450700	0.00133237	ukb-b-20544	TRUE	reported	igd	2	TRUE
Nervous feelings	rs1296172	G	A	G	A	0.00473212	0.0103	0.580684	0.5466	FALSE	FALSE	FALSE	finn-b-I9_ICH	1	227099874	0.0353	NA	0.7706	Intracerebral haemmorrhage || id:finn-b-I9_ICH	Intracerebral haemmorrhage	Intracerebral haemmorrhage || ||	TRUE	igd	NA	NA	NA	NA	NA	NA	NA	1	227099874	1.6e-07	450700	0.000902409	ukb-b-20544	TRUE	reported	igd	2	TRUE
Nervous feelings	rs12978969	C	T	C	T	-0.00447394	0.0364	0.358462	0.2837	FALSE	FALSE	FALSE	finn-b-I9_ICH	19	21872000	0.0392	NA	0.3526	Intracerebral haemmorrhage || id:finn-b-I9_ICH	Intracerebral haemmorrhage	Intracerebral haemmorrhage || ||	TRUE	igd	NA	NA	NA	NA	NA	NA	NA	19	21872000	1.5e-06	450700	0.000928798	ukb-b-20544	TRUE	reported	igd	2	TRUE
Nervous feelings	rs13018657	C	T	C	T	-0.00473345	-0.0046	0.497516	0.4107	FALSE	FALSE	FALSE	finn-b-I9_ICH	2	107556775	0.0358	NA	0.8988	Intracerebral haemmorrhage || id:finn-b-I9_ICH	Intracerebral haemmorrhage	Intracerebral haemmorrhage || ||	TRUE	igd	NA	NA	NA	NA	NA	NA	NA	2	107556775	1.09999e-07	450700	0.000891161	ukb-b-20544	TRUE	reported	igd	2	TRUE
Nervous feelings	rs13262595	G	A	G	A	-0.00640066	-0.0215	0.560927	0.5967	FALSE	FALSE	FALSE	finn-b-I9_ICH	8	143316970	0.0358	NA	0.547599	Intracerebral haemmorrhage || id:finn-b-I9_ICH	Intracerebral haemmorrhage	Intracerebral haemmorrhage || ||	TRUE	igd	NA	NA	NA	NA	NA	NA	NA	8	143316970	8.69961e-13	450700	0.000895332	ukb-b-20544	TRUE	reported	igd	2	TRUE
Nervous feelings	rs13276026	A	G	A	G	0.0081024	-0.0389	0.571428	0.5337	FALSE	FALSE	FALSE	finn-b-I9_ICH	8	10612075	0.0475	NA	0.4137	Intracerebral haemmorrhage || id:finn-b-I9_ICH	Intracerebral haemmorrhage	Intracerebral haemmorrhage || ||	TRUE	igd	TRUE	rs13276026	rs7018334	G	A	G	A	8	10609955	2.90001e-19	450700	0.000903164	ukb-b-20544	TRUE	reported	igd	2	TRUE
Nervous feelings	rs1358820	G	A	G	A	0.00480909	-0.0008	0.60929	0.5786	FALSE	FALSE	FALSE	finn-b-I9_ICH	1	34318094	0.0356	NA	0.9819	Intracerebral haemmorrhage || id:finn-b-I9_ICH	Intracerebral haemmorrhage	Intracerebral haemmorrhage || ||	TRUE	igd	NA	NA	NA	NA	NA	NA	NA	1	34318094	1.29999e-07	450700	0.000911196	ukb-b-20544	TRUE	reported	igd	2	TRUE
Nervous feelings	rs139375236	T	C	T	C	0.0236265	0.1419	0.009331	0.02057	FALSE	FALSE	FALSE	finn-b-I9_ICH	7	36491474	0.1245	NA	0.2544	Intracerebral haemmorrhage || id:finn-b-I9_ICH	Intracerebral haemmorrhage	Intracerebral haemmorrhage || ||	TRUE	igd	NA	NA	NA	NA	NA	NA	NA	7	36491474	7.00003e-07	450700	0.00476078	ukb-b-20544	TRUE	reported	igd	2	TRUE
Nervous feelings	rs1427041	G	A	G	A	-0.0069272	0.006	0.829641	0.8614	FALSE	FALSE	FALSE	finn-b-I9_ICH	18	35208320	0.0511	NA	0.9072	Intracerebral haemmorrhage || id:finn-b-I9_ICH	Intracerebral haemmorrhage	Intracerebral haemmorrhage || ||	TRUE	igd	NA	NA	NA	NA	NA	NA	NA	18	35208320	4.79999e-09	450700	0.001183	ukb-b-20544	TRUE	reported	igd	2	TRUE
Nervous feelings	rs1433418	G	A	G	A	-0.00432147	0.0473	0.410342	0.432	FALSE	FALSE	FALSE	finn-b-I9_ICH	4	58984954	0.0354	NA	0.1821	Intracerebral haemmorrhage || id:finn-b-I9_ICH	Intracerebral haemmorrhage	Intracerebral haemmorrhage || ||	TRUE	igd	NA	NA	NA	NA	NA	NA	NA	4	58984954	1.79999e-06	450700	0.000905062	ukb-b-20544	TRUE	reported	igd	2	TRUE
Nervous feelings	rs1434611	G	C	G	C	-0.00569813	0.0112	0.761676	0.7364	FALSE	TRUE	FALSE	finn-b-I9_ICH	4	162718310	0.0397	NA	0.778099	Intracerebral haemmorrhage || id:finn-b-I9_ICH	Intracerebral haemmorrhage	Intracerebral haemmorrhage || ||	TRUE	igd	NA	NA	NA	NA	NA	NA	NA	4	162718310	4.60002e-08	450700	0.00104249	ukb-b-20544	TRUE	reported	igd	2	TRUE
Nervous feelings	rs1530761	C	A	C	A	0.00416289	-0.0064	0.443395	0.3452	FALSE	FALSE	FALSE	finn-b-I9_ICH	2	175259065	0.0371	NA	0.8631	Intracerebral haemmorrhage || id:finn-b-I9_ICH	Intracerebral haemmorrhage	Intracerebral haemmorrhage || ||	TRUE	igd	NA	NA	NA	NA	NA	NA	NA	2	175259065	3.50002e-06	450700	0.000897193	ukb-b-20544	TRUE	reported	igd	2	TRUE
Nervous feelings	rs1539952	G	A	G	A	-0.00611236	-0.0706	0.248234	0.1921	FALSE	FALSE	FALSE	finn-b-I9_ICH	18	57766512	0.0446	NA	0.1133	Intracerebral haemmorrhage || id:finn-b-I9_ICH	Intracerebral haemmorrhage	Intracerebral haemmorrhage || ||	TRUE	igd	NA	NA	NA	NA	NA	NA	NA	18	57766512	3.40001e-09	450700	0.00103411	ukb-b-20544	TRUE	reported	igd	2	TRUE
Nervous feelings	rs1569998	C	A	C	A	0.00656005	-0.0163	0.208301	0.1924	FALSE	FALSE	FALSE	finn-b-I9_ICH	20	14485772	0.0448	NA	0.715501	Intracerebral haemmorrhage || id:finn-b-I9_ICH	Intracerebral haemmorrhage	Intracerebral haemmorrhage || ||	TRUE	igd	NA	NA	NA	NA	NA	NA	NA	20	14485772	2.19999e-09	450700	0.00109651	ukb-b-20544	TRUE	reported	igd	2	TRUE
Nervous feelings	rs1640880	A	C	A	C	0.00482076	0.0411	0.257409	0.2554	FALSE	FALSE	FALSE	finn-b-I9_ICH	16	6393239	0.0404	NA	0.3093	Intracerebral haemmorrhage || id:finn-b-I9_ICH	Intracerebral haemmorrhage	Intracerebral haemmorrhage || ||	TRUE	igd	NA	NA	NA	NA	NA	NA	NA	16	6393239	2.5e-06	450700	0.00102389	ukb-b-20544	TRUE	reported	igd	2	TRUE
Nervous feelings	rs1669025	G	A	G	A	-0.00452914	-0.0101	0.489992	0.5015	FALSE	FALSE	FALSE	finn-b-I9_ICH	7	137069055	0.0353	NA	0.774	Intracerebral haemmorrhage || id:finn-b-I9_ICH	Intracerebral haemmorrhage	Intracerebral haemmorrhage || ||	TRUE	igd	NA	NA	NA	NA	NA	NA	NA	7	137069055	3.89996e-07	450700	0.000892777	ukb-b-20544	TRUE	reported	igd	2	TRUE
Nervous feelings	rs17367186	G	T	G	T	-0.0061058	0.0103	0.21396	0.1733	FALSE	FALSE	FALSE	finn-b-I9_ICH	12	99520594	0.0467	NA	0.8261	Intracerebral haemmorrhage || id:finn-b-I9_ICH	Intracerebral haemmorrhage	Intracerebral haemmorrhage || ||	TRUE	igd	NA	NA	NA	NA	NA	NA	NA	12	99520594	2.1e-08	450700	0.00108936	ukb-b-20544	TRUE	reported	igd	2	TRUE
Nervous feelings	rs17460541	T	G	T	G	0.00823481	-0.0783	0.625079	0.7148	FALSE	FALSE	FALSE	finn-b-I9_ICH	3	85618112	0.0389	NA	0.0443098	Intracerebral haemmorrhage || id:finn-b-I9_ICH	Intracerebral haemmorrhage	Intracerebral haemmorrhage || ||	TRUE	igd	NA	NA	NA	NA	NA	NA	NA	3	85618112	3.29989e-19	450700	0.000919294	ukb-b-20544	TRUE	reported	igd	2	TRUE
Nervous feelings	rs17567635	A	G	A	G	-0.00644388	0.0875	0.113532	0.133	FALSE	FALSE	FALSE	finn-b-I9_ICH	5	27083580	0.0523	NA	0.0943691	Intracerebral haemmorrhage || id:finn-b-I9_ICH	Intracerebral haemmorrhage	Intracerebral haemmorrhage || ||	TRUE	igd	NA	NA	NA	NA	NA	NA	NA	5	27083580	4.09996e-06	450700	0.00139951	ukb-b-20544	TRUE	reported	igd	2	TRUE
Nervous feelings	rs17710932	T	G	T	G	-0.0041614	-0.0314	0.495631	0.4006	FALSE	FALSE	FALSE	finn-b-I9_ICH	8	97460867	0.0358	NA	0.3797	Intracerebral haemmorrhage || id:finn-b-I9_ICH	Intracerebral haemmorrhage	Intracerebral haemmorrhage || ||	TRUE	igd	NA	NA	NA	NA	NA	NA	NA	8	97460867	3.09999e-06	450700	0.000892022	ukb-b-20544	TRUE	reported	igd	2	TRUE
Nervous feelings	rs17782915	C	T	C	T	-0.0045269	-0.019	0.380263	0.4016	FALSE	FALSE	FALSE	finn-b-I9_ICH	5	100303867	0.0359	NA	0.5972	Intracerebral haemmorrhage || id:finn-b-I9_ICH	Intracerebral haemmorrhage	Intracerebral haemmorrhage || ||	TRUE	igd	NA	NA	NA	NA	NA	NA	NA	5	100303867	8.19993e-07	450700	0.000918267	ukb-b-20544	TRUE	reported	igd	2	TRUE
Nervous feelings	rs17884466	G	A	G	A	0.0072484	0.0252	0.138499	0.105	FALSE	FALSE	FALSE	finn-b-I9_ICH	17	29546765	0.0576	NA	0.661601	Intracerebral haemmorrhage || id:finn-b-I9_ICH	Intracerebral haemmorrhage	Intracerebral haemmorrhage || ||	TRUE	igd	NA	NA	NA	NA	NA	NA	NA	17	29546765	1.79999e-08	450700	0.00128722	ukb-b-20544	TRUE	reported	igd	2	TRUE
Nervous feelings	rs184358924	T	C	T	C	0.0250683	0.1411	0.008749	0.01503	FALSE	FALSE	FALSE	finn-b-I9_ICH	4	59894480	0.1479	NA	0.3399	Intracerebral haemmorrhage || id:finn-b-I9_ICH	Intracerebral haemmorrhage	Intracerebral haemmorrhage || ||	TRUE	igd	NA	NA	NA	NA	NA	NA	NA	4	59894480	9.40005e-07	450700	0.00511265	ukb-b-20544	TRUE	reported	igd	2	TRUE
Nervous feelings	rs1873975	A	G	A	G	0.00509214	0.1426	0.240436	0.2234	FALSE	FALSE	FALSE	finn-b-I9_ICH	17	1935204	0.0424	NA	0.000766796	Intracerebral haemmorrhage || id:finn-b-I9_ICH	Intracerebral haemmorrhage	Intracerebral haemmorrhage || ||	TRUE	igd	TRUE	rs1873975	rs9907156	A	G	T	C	17	1932662	1.29999e-06	450700	0.00105056	ukb-b-20544	TRUE	reported	igd	2	TRUE
Nervous feelings	rs2153960	A	G	A	G	-0.0046858	-0.0037	0.711025	0.6358	FALSE	FALSE	FALSE	finn-b-I9_ICH	6	108988184	0.0366	NA	0.9192	Intracerebral haemmorrhage || id:finn-b-I9_ICH	Intracerebral haemmorrhage	Intracerebral haemmorrhage || ||	TRUE	igd	NA	NA	NA	NA	NA	NA	NA	6	108988184	1.6e-06	450700	0.000977763	ukb-b-20544	TRUE	reported	igd	2	TRUE
Nervous feelings	rs2186407	T	C	T	C	0.00440071	-0.017	0.62139	0.6584	FALSE	FALSE	FALSE	finn-b-I9_ICH	11	58115398	0.0378	NA	0.6516	Intracerebral haemmorrhage || id:finn-b-I9_ICH	Intracerebral haemmorrhage	Intracerebral haemmorrhage || ||	TRUE	igd	NA	NA	NA	NA	NA	NA	NA	11	58115398	1.5e-06	450700	0.000915671	ukb-b-20544	TRUE	reported	igd	2	TRUE
Nervous feelings	rs2196958	G	T	G	T	-0.00442725	0.084	0.664942	0.677	FALSE	FALSE	FALSE	finn-b-I9_ICH	3	136881627	0.0377	NA	0.0259502	Intracerebral haemmorrhage || id:finn-b-I9_ICH	Intracerebral haemmorrhage	Intracerebral haemmorrhage || ||	TRUE	igd	NA	NA	NA	NA	NA	NA	NA	3	136881627	2.99999e-06	450700	0.000948428	ukb-b-20544	TRUE	reported	igd	2	TRUE
Nervous feelings	rs2205129	A	G	A	G	-0.00554338	0.0247	0.314986	0.2474	FALSE	FALSE	FALSE	finn-b-I9_ICH	21	41464434	0.0411	NA	0.548001	Intracerebral haemmorrhage || id:finn-b-I9_ICH	Intracerebral haemmorrhage	Intracerebral haemmorrhage || ||	TRUE	igd	NA	NA	NA	NA	NA	NA	NA	21	41464434	7.59994e-09	450700	0.000959557	ukb-b-20544	TRUE	reported	igd	2	TRUE
Nervous feelings	rs2367724	T	C	T	C	0.00509921	0.0774	0.67285	0.6732	FALSE	FALSE	FALSE	finn-b-I9_ICH	1	44107428	0.0374	NA	0.0384999	Intracerebral haemmorrhage || id:finn-b-I9_ICH	Intracerebral haemmorrhage	Intracerebral haemmorrhage || ||	TRUE	igd	NA	NA	NA	NA	NA	NA	NA	1	44107428	7.19996e-08	450700	0.000946628	ukb-b-20544	TRUE	reported	igd	2	TRUE
Nervous feelings	rs239488	G	A	G	A	0.00489911	0.0711	0.734926	0.6926	FALSE	FALSE	FALSE	finn-b-I9_ICH	20	3373776	0.0381	NA	0.0622802	Intracerebral haemmorrhage || id:finn-b-I9_ICH	Intracerebral haemmorrhage	Intracerebral haemmorrhage || ||	TRUE	igd	NA	NA	NA	NA	NA	NA	NA	20	3373776	1.2e-06	450700	0.00100774	ukb-b-20544	TRUE	reported	igd	2	TRUE
Nervous feelings	rs2407746	G	C	G	C	0.00537951	0.0209	0.305064	0.3557	FALSE	TRUE	FALSE	finn-b-I9_ICH	8	4937757	0.0367	NA	0.5684	Intracerebral haemmorrhage || id:finn-b-I9_ICH	Intracerebral haemmorrhage	Intracerebral haemmorrhage || ||	TRUE	igd	NA	NA	NA	NA	NA	NA	NA	8	4937757	2.80001e-08	450700	0.000969087	ukb-b-20544	TRUE	reported	igd	2	TRUE
Nervous feelings	rs2488397	C	G	C	G	-0.00560174	0.0227	0.213233	0.1458	FALSE	TRUE	FALSE	finn-b-I9_ICH	1	197701279	0.0499	NA	0.6487	Intracerebral haemmorrhage || id:finn-b-I9_ICH	Intracerebral haemmorrhage	Intracerebral haemmorrhage || ||	TRUE	igd	NA	NA	NA	NA	NA	NA	NA	1	197701279	2.39999e-07	450700	0.00108491	ukb-b-20544	TRUE	reported	igd	2	TRUE
Nervous feelings	rs2504653	G	A	G	A	-0.00450677	-0.0025	0.620601	0.5367	FALSE	FALSE	FALSE	finn-b-I9_ICH	6	77118114	0.0352	NA	0.943	Intracerebral haemmorrhage || id:finn-b-I9_ICH	Intracerebral haemmorrhage	Intracerebral haemmorrhage || ||	TRUE	igd	NA	NA	NA	NA	NA	NA	NA	6	77118114	9.29994e-07	450700	0.000918521	ukb-b-20544	TRUE	reported	igd	2	TRUE
Nervous feelings	rs2505060	A	G	A	G	0.00805496	0.0928	0.124168	0.08593	FALSE	FALSE	FALSE	finn-b-I9_ICH	6	98641374	0.0626	NA	0.1385	Intracerebral haemmorrhage || id:finn-b-I9_ICH	Intracerebral haemmorrhage	Intracerebral haemmorrhage || ||	TRUE	igd	TRUE	rs2505060	rs9388280	A	G	A	G	6	98583468	2.59998e-09	450700	0.0013528	ukb-b-20544	TRUE	reported	igd	2	TRUE
Nervous feelings	rs2582668	C	T	C	T	-0.0193905	0.1267	0.9873	0.9945	FALSE	FALSE	FALSE	finn-b-I9_ICH	5	16294168	0.2421	NA	0.600701	Intracerebral haemmorrhage || id:finn-b-I9_ICH	Intracerebral haemmorrhage	Intracerebral haemmorrhage || ||	TRUE	igd	NA	NA	NA	NA	NA	NA	NA	5	16294168	1e-06	450700	0.00396723	ukb-b-20544	TRUE	reported	igd	2	TRUE
Nervous feelings	rs28426374	T	C	T	C	-0.00666423	-0.0048	0.454722	0.5772	FALSE	FALSE	FALSE	finn-b-I9_ICH	14	75346740	0.0356	NA	0.8938	Intracerebral haemmorrhage || id:finn-b-I9_ICH	Intracerebral haemmorrhage	Intracerebral haemmorrhage || ||	TRUE	igd	NA	NA	NA	NA	NA	NA	NA	14	75346740	8.00018e-14	450700	0.000892147	ukb-b-20544	TRUE	reported	igd	2	TRUE
Nervous feelings	rs28581381	G	A	G	A	-0.00447377	-0.0008	0.470743	0.3981	FALSE	FALSE	FALSE	finn-b-I9_ICH	15	88655328	0.0362	NA	0.9813	Intracerebral haemmorrhage || id:finn-b-I9_ICH	Intracerebral haemmorrhage	Intracerebral haemmorrhage || ||	TRUE	igd	NA	NA	NA	NA	NA	NA	NA	15	88655328	8.40001e-07	450700	0.000908163	ukb-b-20544	TRUE	reported	igd	2	TRUE
Nervous feelings	rs28602630	A	G	A	G	0.0109227	-0.0451	0.078638	0.04133	FALSE	FALSE	FALSE	finn-b-I9_ICH	19	46144814	0.0888	NA	0.611799	Intracerebral haemmorrhage || id:finn-b-I9_ICH	Intracerebral haemmorrhage	Intracerebral haemmorrhage || ||	TRUE	igd	NA	NA	NA	NA	NA	NA	NA	19	46144814	9.49948e-11	450700	0.00168702	ukb-b-20544	TRUE	reported	igd	2	TRUE
Nervous feelings	rs2881756	T	C	T	C	0.00467591	-0.0041	0.41192	0.5031	FALSE	FALSE	FALSE	finn-b-I9_ICH	7	7256440	0.0352	NA	0.9075	Intracerebral haemmorrhage || id:finn-b-I9_ICH	Intracerebral haemmorrhage	Intracerebral haemmorrhage || ||	TRUE	igd	NA	NA	NA	NA	NA	NA	NA	7	7256440	2.59998e-07	450700	0.000908379	ukb-b-20544	TRUE	reported	igd	2	TRUE
Nervous feelings	rs2930456	C	G	C	G	0.00759263	0.0503	0.880684	0.9124	FALSE	TRUE	FALSE	finn-b-I9_ICH	10	107050168	0.0625	NA	0.4209	Intracerebral haemmorrhage || id:finn-b-I9_ICH	Intracerebral haemmorrhage	Intracerebral haemmorrhage || ||	TRUE	igd	NA	NA	NA	NA	NA	NA	NA	10	107050168	3.40001e-08	450700	0.00137555	ukb-b-20544	TRUE	reported	igd	2	TRUE
Nervous feelings	rs2936567	G	A	G	A	0.00536756	-0.01	0.34775	0.3364	FALSE	FALSE	FALSE	finn-b-I9_ICH	10	93064890	0.0372	NA	0.788501	Intracerebral haemmorrhage || id:finn-b-I9_ICH	Intracerebral haemmorrhage	Intracerebral haemmorrhage || ||	TRUE	igd	NA	NA	NA	NA	NA	NA	NA	10	93064890	8.9e-09	450700	0.00093329	ukb-b-20544	TRUE	reported	igd	2	TRUE
Nervous feelings	rs332828	A	G	A	G	0.00555181	0.0358	0.456999	0.4899	FALSE	FALSE	FALSE	finn-b-I9_ICH	1	61742693	0.0351	NA	0.3084	Intracerebral haemmorrhage || id:finn-b-I9_ICH	Intracerebral haemmorrhage	Intracerebral haemmorrhage || ||	TRUE	igd	NA	NA	NA	NA	NA	NA	NA	1	61742693	5e-10	450700	0.000892703	ukb-b-20544	TRUE	reported	igd	2	TRUE
Nervous feelings	rs34640730	G	A	G	A	-0.00556982	-0.0443	0.164466	0.1531	FALSE	FALSE	FALSE	finn-b-I9_ICH	3	134576669	0.0488	NA	0.3646	Intracerebral haemmorrhage || id:finn-b-I9_ICH	Intracerebral haemmorrhage	Intracerebral haemmorrhage || ||	TRUE	igd	NA	NA	NA	NA	NA	NA	NA	3	134576669	3.40001e-06	450700	0.00119984	ukb-b-20544	TRUE	reported	igd	2	TRUE
Nervous feelings	rs35182	A	G	A	G	0.00834092	0.0001	0.109694	0.0892	FALSE	FALSE	FALSE	finn-b-I9_ICH	16	65038674	0.0622	NA	0.9985	Intracerebral haemmorrhage || id:finn-b-I9_ICH	Intracerebral haemmorrhage	Intracerebral haemmorrhage || ||	TRUE	igd	NA	NA	NA	NA	NA	NA	NA	16	65038674	5.80003e-09	450700	0.00143248	ukb-b-20544	TRUE	reported	igd	2	TRUE
Nervous feelings	rs353547	C	T	C	T	0.00662088	-0.0123	0.62327	0.5691	FALSE	FALSE	FALSE	finn-b-I9_ICH	3	52268866	0.0355	NA	0.728501	Intracerebral haemmorrhage || id:finn-b-I9_ICH	Intracerebral haemmorrhage	Intracerebral haemmorrhage || ||	TRUE	igd	NA	NA	NA	NA	NA	NA	NA	3	52268866	5.40008e-13	450700	0.000917531	ukb-b-20544	TRUE	reported	igd	2	TRUE
Nervous feelings	rs35697571	C	G	C	G	0.00629092	-0.0377	0.17397	0.1693	FALSE	TRUE	FALSE	finn-b-I9_ICH	1	115327264	0.0469	NA	0.4206	Intracerebral haemmorrhage || id:finn-b-I9_ICH	Intracerebral haemmorrhage	Intracerebral haemmorrhage || ||	TRUE	igd	NA	NA	NA	NA	NA	NA	NA	1	115327264	8.70001e-08	450700	0.00117559	ukb-b-20544	TRUE	reported	igd	2	TRUE
Nervous feelings	rs36032388	G	A	G	A	-0.00687583	-0.0219	0.099547	0.1136	FALSE	FALSE	FALSE	finn-b-I9_ICH	16	6179828	0.0555	NA	0.6939	Intracerebral haemmorrhage || id:finn-b-I9_ICH	Intracerebral haemmorrhage	Intracerebral haemmorrhage || ||	TRUE	igd	NA	NA	NA	NA	NA	NA	NA	16	6179828	4.60002e-06	450700	0.00150067	ukb-b-20544	TRUE	reported	igd	2	TRUE
Nervous feelings	rs3732359	A	G	A	G	0.0051659	-0.0176	0.780239	0.6921	FALSE	FALSE	FALSE	finn-b-I9_ICH	3	119536429	0.0378	NA	0.6417	Intracerebral haemmorrhage || id:finn-b-I9_ICH	Intracerebral haemmorrhage	Intracerebral haemmorrhage || ||	TRUE	igd	NA	NA	NA	NA	NA	NA	NA	3	119536429	1.5e-06	450700	0.00107454	ukb-b-20544	TRUE	reported	igd	2	TRUE
Nervous feelings	rs3743266	C	T	C	T	0.00435499	-0.0462	0.335073	0.2259	FALSE	FALSE	FALSE	finn-b-I9_ICH	15	60781513	0.042	NA	0.2717	Intracerebral haemmorrhage || id:finn-b-I9_ICH	Intracerebral haemmorrhage	Intracerebral haemmorrhage || ||	TRUE	igd	NA	NA	NA	NA	NA	NA	NA	15	60781513	3.89996e-06	450700	0.000943071	ukb-b-20544	TRUE	reported	igd	2	TRUE
Nervous feelings	rs3760994	A	G	A	G	-0.00417303	0.0219	0.496629	0.4103	FALSE	FALSE	FALSE	finn-b-I9_ICH	19	1435771	0.0362	NA	0.545301	Intracerebral haemmorrhage || id:finn-b-I9_ICH	Intracerebral haemmorrhage	Intracerebral haemmorrhage || ||	TRUE	igd	NA	NA	NA	NA	NA	NA	NA	19	1435771	2.59998e-06	450700	0.000888444	ukb-b-20544	TRUE	reported	igd	2	TRUE
Nervous feelings	rs3761905	G	C	G	C	-0.00464923	0.041	0.363719	0.416	FALSE	TRUE	FALSE	finn-b-I9_ICH	1	180886810	0.036	NA	0.255	Intracerebral haemmorrhage || id:finn-b-I9_ICH	Intracerebral haemmorrhage	Intracerebral haemmorrhage || ||	TRUE	igd	NA	NA	NA	NA	NA	NA	NA	1	180886810	7.79992e-07	450700	0.00094131	ukb-b-20544	TRUE	reported	igd	2	TRUE
Nervous feelings	rs3764002	T	C	T	C	0.00612051	-0.0545	0.261446	0.3434	FALSE	FALSE	FALSE	finn-b-I9_ICH	12	108618630	0.037	NA	0.1409	Intracerebral haemmorrhage || id:finn-b-I9_ICH	Intracerebral haemmorrhage	Intracerebral haemmorrhage || ||	TRUE	igd	NA	NA	NA	NA	NA	NA	NA	12	108618630	1.40001e-09	450700	0.00101137	ukb-b-20544	TRUE	reported	igd	2	TRUE
Nervous feelings	rs3775801	C	A	C	A	-0.00454766	-0.0402	0.365028	0.4024	FALSE	FALSE	FALSE	finn-b-I9_ICH	4	146084427	0.0359	NA	0.2628	Intracerebral haemmorrhage || id:finn-b-I9_ICH	Intracerebral haemmorrhage	Intracerebral haemmorrhage || ||	TRUE	igd	NA	NA	NA	NA	NA	NA	NA	4	146084427	8.40001e-07	450700	0.000923135	ukb-b-20544	TRUE	reported	igd	2	TRUE
Nervous feelings	rs3794204	C	T	C	T	-0.00539811	0.0528	0.177552	0.2337	FALSE	FALSE	FALSE	finn-b-I9_ICH	12	121687015	0.0414	NA	0.2023	Intracerebral haemmorrhage || id:finn-b-I9_ICH	Intracerebral haemmorrhage	Intracerebral haemmorrhage || ||	TRUE	igd	NA	NA	NA	NA	NA	NA	NA	12	121687015	3.50002e-06	450700	0.0011643	ukb-b-20544	TRUE	reported	igd	2	TRUE
Nervous feelings	rs3904795	A	G	A	G	0.006582	-0.0523	0.880047	0.8816	FALSE	FALSE	FALSE	finn-b-I9_ICH	1	83840273	0.0549	NA	0.3413	Intracerebral haemmorrhage || id:finn-b-I9_ICH	Intracerebral haemmorrhage	Intracerebral haemmorrhage || ||	TRUE	igd	NA	NA	NA	NA	NA	NA	NA	1	83840273	1.6e-06	450700	0.00137113	ukb-b-20544	TRUE	reported	igd	2	TRUE
Nervous feelings	rs4313099	C	A	C	A	-0.00545763	0.0548	0.60056	0.5918	FALSE	FALSE	FALSE	finn-b-I9_ICH	7	82062099	0.0358	NA	0.126	Intracerebral haemmorrhage || id:finn-b-I9_ICH	Intracerebral haemmorrhage	Intracerebral haemmorrhage || ||	TRUE	igd	NA	NA	NA	NA	NA	NA	NA	7	82062099	1.79999e-09	450700	0.000907934	ukb-b-20544	TRUE	reported	igd	2	TRUE
Nervous feelings	rs4344903	T	A	T	A	0.00423207	0.0554	0.413187	0.3578	FALSE	TRUE	FALSE	finn-b-I9_ICH	2	13133041	0.0367	NA	0.1305	Intracerebral haemmorrhage || id:finn-b-I9_ICH	Intracerebral haemmorrhage	Intracerebral haemmorrhage || ||	TRUE	igd	NA	NA	NA	NA	NA	NA	NA	2	13133041	2.99999e-06	450700	0.000905983	ukb-b-20544	TRUE	reported	igd	2	TRUE
Nervous feelings	rs4379670	A	T	A	T	-0.00568273	-0.0612	0.817079	0.6954	FALSE	TRUE	FALSE	finn-b-I9_ICH	1	154439865	0.0383	NA	0.1098	Intracerebral haemmorrhage || id:finn-b-I9_ICH	Intracerebral haemmorrhage	Intracerebral haemmorrhage || ||	TRUE	igd	NA	NA	NA	NA	NA	NA	NA	1	154439865	8e-07	450700	0.00115149	ukb-b-20544	TRUE	reported	igd	2	TRUE
Nervous feelings	rs4575326	T	C	T	C	0.00607772	0.068	0.131406	0.1701	FALSE	FALSE	FALSE	finn-b-I9_ICH	12	97853731	0.0467	NA	0.1458	Intracerebral haemmorrhage || id:finn-b-I9_ICH	Intracerebral haemmorrhage	Intracerebral haemmorrhage || ||	TRUE	igd	NA	NA	NA	NA	NA	NA	NA	12	97853731	4e-06	450700	0.00131795	ukb-b-20544	TRUE	reported	igd	2	TRUE
Nervous feelings	rs4688569	C	T	C	T	-0.0050617	-0.0234	0.237449	0.1626	FALSE	FALSE	FALSE	finn-b-I9_ICH	3	65465258	0.0476	NA	0.622801	Intracerebral haemmorrhage || id:finn-b-I9_ICH	Intracerebral haemmorrhage	Intracerebral haemmorrhage || ||	TRUE	igd	NA	NA	NA	NA	NA	NA	NA	3	65465258	1.29999e-06	450700	0.00104666	ukb-b-20544	TRUE	reported	igd	2	TRUE
Nervous feelings	rs4787491	G	A	G	A	-0.00559896	-0.0216	0.535253	0.4386	FALSE	FALSE	FALSE	finn-b-I9_ICH	16	30015337	0.0353	NA	0.5414	Intracerebral haemmorrhage || id:finn-b-I9_ICH	Intracerebral haemmorrhage	Intracerebral haemmorrhage || ||	TRUE	igd	NA	NA	NA	NA	NA	NA	NA	16	30015337	3.29997e-10	450700	0.000891047	ukb-b-20544	TRUE	reported	igd	2	TRUE
Nervous feelings	rs4885657	T	C	T	C	0.00433907	0.0462	0.581316	0.5566	FALSE	FALSE	FALSE	finn-b-I9_ICH	13	55677154	0.0356	NA	0.1935	Intracerebral haemmorrhage || id:finn-b-I9_ICH	Intracerebral haemmorrhage	Intracerebral haemmorrhage || ||	TRUE	igd	NA	NA	NA	NA	NA	NA	NA	13	55677154	1.7e-06	450700	0.000905646	ukb-b-20544	TRUE	reported	igd	2	TRUE
Nervous feelings	rs4910085	T	C	T	C	0.00471343	-0.001	0.569266	0.5783	FALSE	FALSE	FALSE	finn-b-I9_ICH	11	9981297	0.0357	NA	0.9782	Intracerebral haemmorrhage || id:finn-b-I9_ICH	Intracerebral haemmorrhage	Intracerebral haemmorrhage || ||	TRUE	igd	NA	NA	NA	NA	NA	NA	NA	11	9981297	1.89998e-07	450700	0.000904482	ukb-b-20544	TRUE	reported	igd	2	TRUE
Nervous feelings	rs501964	T	C	T	C	-0.00443022	0.0135	0.344562	0.3726	FALSE	FALSE	FALSE	finn-b-I9_ICH	2	45138941	0.0364	NA	0.711001	Intracerebral haemmorrhage || id:finn-b-I9_ICH	Intracerebral haemmorrhage	Intracerebral haemmorrhage || ||	TRUE	igd	NA	NA	NA	NA	NA	NA	NA	2	45138941	2.39999e-06	450700	0.000939287	ukb-b-20544	TRUE	reported	igd	2	TRUE
Nervous feelings	rs535066	T	G	T	G	-0.00517287	-0.0467	0.567495	0.5918	FALSE	FALSE	FALSE	finn-b-I9_ICH	4	46240287	0.0358	NA	0.1914	Intracerebral haemmorrhage || id:finn-b-I9_ICH	Intracerebral haemmorrhage	Intracerebral haemmorrhage || ||	TRUE	igd	NA	NA	NA	NA	NA	NA	NA	4	46240287	8.9e-09	450700	0.000899552	ukb-b-20544	TRUE	reported	igd	2	TRUE
Nervous feelings	rs55921384	A	C	A	C	-0.0120336	0.0915	0.031545	0.01395	FALSE	FALSE	FALSE	finn-b-I9_ICH	5	15554702	0.1549	NA	0.5547	Intracerebral haemmorrhage || id:finn-b-I9_ICH	Intracerebral haemmorrhage	Intracerebral haemmorrhage || ||	TRUE	igd	NA	NA	NA	NA	NA	NA	NA	5	15554702	2.19999e-06	450700	0.00254186	ukb-b-20544	TRUE	reported	igd	2	TRUE
Nervous feelings	rs55966307	T	C	T	C	0.0153604	0.0867	0.020765	0.02536	FALSE	FALSE	FALSE	finn-b-I9_ICH	19	11496289	0.1123	NA	0.4398	Intracerebral haemmorrhage || id:finn-b-I9_ICH	Intracerebral haemmorrhage	Intracerebral haemmorrhage || ||	TRUE	igd	NA	NA	NA	NA	NA	NA	NA	19	11496289	1.6e-06	450700	0.00320125	ukb-b-20544	TRUE	reported	igd	2	TRUE
Nervous feelings	rs56357423	T	C	T	C	-0.00526332	0.0093	0.25339	0.3333	FALSE	FALSE	FALSE	finn-b-I9_ICH	2	53129718	0.0374	NA	0.8044	Intracerebral haemmorrhage || id:finn-b-I9_ICH	Intracerebral haemmorrhage	Intracerebral haemmorrhage || ||	TRUE	igd	NA	NA	NA	NA	NA	NA	NA	2	53129718	3.09999e-07	450700	0.00102904	ukb-b-20544	TRUE	reported	igd	2	TRUE
Nervous feelings	rs57307148	A	C	A	C	-0.00575098	0.0542	0.212944	0.2147	FALSE	FALSE	FALSE	finn-b-I9_ICH	12	1033183	0.043	NA	0.2073	Intracerebral haemmorrhage || id:finn-b-I9_ICH	Intracerebral haemmorrhage	Intracerebral haemmorrhage || ||	TRUE	igd	NA	NA	NA	NA	NA	NA	NA	12	1033183	1.2e-07	450700	0.00108696	ukb-b-20544	TRUE	reported	igd	2	TRUE
Nervous feelings	rs57351360	A	T	A	T	-0.0043868	0.0443	0.376734	0.3827	FALSE	TRUE	FALSE	finn-b-I9_ICH	1	21229538	0.0362	NA	0.2203	Intracerebral haemmorrhage || id:finn-b-I9_ICH	Intracerebral haemmorrhage	Intracerebral haemmorrhage || ||	TRUE	igd	NA	NA	NA	NA	NA	NA	NA	1	21229538	1.89998e-06	450700	0.000919899	ukb-b-20544	TRUE	reported	igd	2	TRUE
Nervous feelings	rs58351927	G	A	G	A	-0.00485027	-0.0123	0.301941	0.4261	FALSE	FALSE	FALSE	finn-b-I9_ICH	17	5297038	0.0358	NA	0.7312	Intracerebral haemmorrhage || id:finn-b-I9_ICH	Intracerebral haemmorrhage	Intracerebral haemmorrhage || ||	TRUE	igd	NA	NA	NA	NA	NA	NA	NA	17	5297038	5.69994e-07	450700	0.000970031	ukb-b-20544	TRUE	reported	igd	2	TRUE
Nervous feelings	rs59143394	G	A	G	A	0.00460398	0.0197	0.298962	0.3325	FALSE	FALSE	FALSE	finn-b-I9_ICH	4	24495967	0.0378	NA	0.6027	Intracerebral haemmorrhage || id:finn-b-I9_ICH	Intracerebral haemmorrhage	Intracerebral haemmorrhage || ||	TRUE	igd	NA	NA	NA	NA	NA	NA	NA	4	24495967	2.39999e-06	450700	0.000976858	ukb-b-20544	TRUE	reported	igd	2	TRUE
Nervous feelings	rs60530198	T	C	T	C	-0.00465779	0.0097	0.276487	0.1909	FALSE	FALSE	FALSE	finn-b-I9_ICH	7	71354652	0.0447	NA	0.829	Intracerebral haemmorrhage || id:finn-b-I9_ICH	Intracerebral haemmorrhage	Intracerebral haemmorrhage || ||	TRUE	igd	NA	NA	NA	NA	NA	NA	NA	7	71354652	2.80001e-06	450700	0.000994137	ukb-b-20544	TRUE	reported	igd	2	TRUE
Nervous feelings	rs61736074	A	C	A	C	0.018381	-0.2522	0.021086	0.02472	FALSE	FALSE	FALSE	finn-b-I9_ICH	15	41989091	0.1148	NA	0.0279898	Intracerebral haemmorrhage || id:finn-b-I9_ICH	Intracerebral haemmorrhage	Intracerebral haemmorrhage || ||	TRUE	igd	NA	NA	NA	NA	NA	NA	NA	15	41989091	2.80001e-09	450700	0.00309407	ukb-b-20544	TRUE	reported	igd	2	TRUE
Nervous feelings	rs61888800	T	G	T	G	-0.00605373	-0.012	0.259446	0.2489	FALSE	FALSE	FALSE	finn-b-I9_ICH	11	27722278	0.0406	NA	0.767901	Intracerebral haemmorrhage || id:finn-b-I9_ICH	Intracerebral haemmorrhage	Intracerebral haemmorrhage || ||	TRUE	igd	NA	NA	NA	NA	NA	NA	NA	11	27722278	2.39999e-09	450700	0.00101395	ukb-b-20544	TRUE	reported	igd	2	TRUE
Nervous feelings	rs62057061	G	C	G	C	0.00867338	-0.0112	0.224054	0.08194	FALSE	TRUE	FALSE	finn-b-I9_ICH	17	43856639	0.0651	NA	0.8635	Intracerebral haemmorrhage || id:finn-b-I9_ICH	Intracerebral haemmorrhage	Intracerebral haemmorrhage || ||	TRUE	igd	NA	NA	NA	NA	NA	NA	NA	17	43856639	3.80014e-16	450700	0.00106497	ukb-b-20544	TRUE	reported	igd	2	TRUE
Nervous feelings	rs62212171	C	T	C	T	0.0077459	0.0259	0.142471	0.07711	FALSE	FALSE	FALSE	finn-b-I9_ICH	20	32987687	0.0659	NA	0.695	Intracerebral haemmorrhage || id:finn-b-I9_ICH	Intracerebral haemmorrhage	Intracerebral haemmorrhage || ||	TRUE	igd	NA	NA	NA	NA	NA	NA	NA	20	32987687	1.2e-09	450700	0.00127425	ukb-b-20544	TRUE	reported	igd	2	TRUE
Nervous feelings	rs62570838	C	A	C	A	-0.00599089	0.0065	0.135945	0.1271	FALSE	FALSE	FALSE	finn-b-I9_ICH	9	24882030	0.0528	NA	0.9025	Intracerebral haemmorrhage || id:finn-b-I9_ICH	Intracerebral haemmorrhage	Intracerebral haemmorrhage || ||	TRUE	igd	NA	NA	NA	NA	NA	NA	NA	9	24882030	4.30002e-06	450700	0.00130319	ukb-b-20544	TRUE	reported	igd	2	TRUE
Nervous feelings	rs6277	A	G	A	G	-0.0049221	0.0115	0.549029	0.4881	FALSE	FALSE	FALSE	finn-b-I9_ICH	11	113283459	0.0353	NA	0.744699	Intracerebral haemmorrhage || id:finn-b-I9_ICH	Intracerebral haemmorrhage	Intracerebral haemmorrhage || ||	TRUE	igd	NA	NA	NA	NA	NA	NA	NA	11	113283459	3.50002e-08	450700	0.000892598	ukb-b-20544	TRUE	reported	igd	2	TRUE
Nervous feelings	rs6476091	C	T	C	T	-0.00466281	0.0087	0.269945	0.3306	FALSE	FALSE	FALSE	finn-b-I9_ICH	9	28717480	0.0374	NA	0.8165	Intracerebral haemmorrhage || id:finn-b-I9_ICH	Intracerebral haemmorrhage	Intracerebral haemmorrhage || ||	TRUE	igd	NA	NA	NA	NA	NA	NA	NA	9	28717480	3.29997e-06	450700	0.00100274	ukb-b-20544	TRUE	reported	igd	2	TRUE
Nervous feelings	rs6539284	C	T	C	T	-0.00488866	-0.002	0.42865	0.4183	FALSE	FALSE	FALSE	finn-b-I9_ICH	12	79592680	0.0357	NA	0.9555	Intracerebral haemmorrhage || id:finn-b-I9_ICH	Intracerebral haemmorrhage	Intracerebral haemmorrhage || ||	TRUE	igd	NA	NA	NA	NA	NA	NA	NA	12	79592680	5.39995e-08	450700	0.000898845	ukb-b-20544	TRUE	reported	igd	2	TRUE
Nervous feelings	rs6590228	C	A	C	A	0.00427485	0.0182	0.569142	0.5211	FALSE	FALSE	FALSE	finn-b-I9_ICH	11	126644734	0.0351	NA	0.6038	Intracerebral haemmorrhage || id:finn-b-I9_ICH	Intracerebral haemmorrhage	Intracerebral haemmorrhage || ||	TRUE	igd	NA	NA	NA	NA	NA	NA	NA	11	126644734	2e-06	450700	0.000899971	ukb-b-20544	TRUE	reported	igd	2	TRUE
Nervous feelings	rs662606	G	A	G	A	0.00548083	-0.125	0.283476	0.2675	FALSE	FALSE	FALSE	finn-b-I9_ICH	11	31858991	0.0403	NA	0.00189998	Intracerebral haemmorrhage || id:finn-b-I9_ICH	Intracerebral haemmorrhage	Intracerebral haemmorrhage || ||	TRUE	igd	NA	NA	NA	NA	NA	NA	NA	11	31858991	7.90005e-08	450700	0.00102089	ukb-b-20544	TRUE	reported	igd	2	TRUE
Nervous feelings	rs6789741	T	G	T	G	0.00516163	0.0356	0.196099	0.2446	FALSE	FALSE	FALSE	finn-b-I9_ICH	3	185479733	0.041	NA	0.386	Intracerebral haemmorrhage || id:finn-b-I9_ICH	Intracerebral haemmorrhage	Intracerebral haemmorrhage || ||	TRUE	igd	NA	NA	NA	NA	NA	NA	NA	3	185479733	4.09996e-06	450700	0.00112046	ukb-b-20544	TRUE	reported	igd	2	TRUE
Nervous feelings	rs6814396	A	C	A	C	-0.00538449	0.0384	0.204458	0.1385	FALSE	FALSE	FALSE	finn-b-I9_ICH	4	135455162	0.0511	NA	0.452701	Intracerebral haemmorrhage || id:finn-b-I9_ICH	Intracerebral haemmorrhage	Intracerebral haemmorrhage || ||	TRUE	igd	NA	NA	NA	NA	NA	NA	NA	4	135455162	1.40001e-06	450700	0.00111615	ukb-b-20544	TRUE	reported	igd	2	TRUE
Nervous feelings	rs6967888	C	T	C	T	0.00561659	-0.0028	0.516884	0.5376	FALSE	FALSE	FALSE	finn-b-I9_ICH	7	97378212	0.0352	NA	0.9375	Intracerebral haemmorrhage || id:finn-b-I9_ICH	Intracerebral haemmorrhage	Intracerebral haemmorrhage || ||	TRUE	igd	TRUE	rs6967888	rs2107138	T	C	A	G	7	97374619	3.40001e-10	450700	0.000894545	ukb-b-20544	TRUE	reported	igd	2	TRUE
Nervous feelings	rs7128674	G	A	G	A	-0.00433952	-0.0148	0.401546	0.4077	FALSE	FALSE	FALSE	finn-b-I9_ICH	11	98312079	0.0358	NA	0.6789	Intracerebral haemmorrhage || id:finn-b-I9_ICH	Intracerebral haemmorrhage	Intracerebral haemmorrhage || ||	TRUE	igd	NA	NA	NA	NA	NA	NA	NA	11	98312079	1.79999e-06	450700	0.000908549	ukb-b-20544	TRUE	reported	igd	2	TRUE
Nervous feelings	rs7179456	T	G	T	G	0.00482357	0.0443	0.649592	0.4527	FALSE	FALSE	FALSE	finn-b-I9_ICH	15	59174539	0.0354	NA	0.2111	Intracerebral haemmorrhage || id:finn-b-I9_ICH	Intracerebral haemmorrhage	Intracerebral haemmorrhage || ||	TRUE	igd	NA	NA	NA	NA	NA	NA	NA	15	59174539	2.19999e-07	450700	0.000931168	ukb-b-20544	TRUE	reported	igd	2	TRUE
Nervous feelings	rs7235757	A	G	A	G	0.00480115	0.031	0.312964	0.2643	FALSE	FALSE	FALSE	finn-b-I9_ICH	18	53067954	0.0398	NA	0.4364	Intracerebral haemmorrhage || id:finn-b-I9_ICH	Intracerebral haemmorrhage	Intracerebral haemmorrhage || ||	TRUE	igd	NA	NA	NA	NA	NA	NA	NA	18	53067954	6.69993e-07	450700	0.000965885	ukb-b-20544	TRUE	reported	igd	2	TRUE
Nervous feelings	rs72606603	T	C	T	C	0.00896132	-0.0264	0.066295	0.05637	FALSE	FALSE	FALSE	finn-b-I9_ICH	8	84191257	0.077	NA	0.731601	Intracerebral haemmorrhage || id:finn-b-I9_ICH	Intracerebral haemmorrhage	Intracerebral haemmorrhage || ||	TRUE	igd	NA	NA	NA	NA	NA	NA	NA	8	84191257	5.49997e-07	450700	0.00178879	ukb-b-20544	TRUE	reported	igd	2	TRUE
Nervous feelings	rs72643191	A	T	A	T	0.0146832	-0.001	0.02099	0.01137	FALSE	TRUE	FALSE	finn-b-I9_ICH	4	67332546	0.1701	NA	0.9954	Intracerebral haemmorrhage || id:finn-b-I9_ICH	Intracerebral haemmorrhage	Intracerebral haemmorrhage || ||	TRUE	igd	NA	NA	NA	NA	NA	NA	NA	4	67332546	3.29997e-06	450700	0.00315595	ukb-b-20544	TRUE	reported	igd	2	TRUE
Nervous feelings	rs72766751	C	G	C	G	0.00482245	-0.0104	0.327039	0.3942	FALSE	TRUE	FALSE	finn-b-I9_ICH	10	1714476	0.0365	NA	0.776201	Intracerebral haemmorrhage || id:finn-b-I9_ICH	Intracerebral haemmorrhage	Intracerebral haemmorrhage || ||	TRUE	igd	NA	NA	NA	NA	NA	NA	NA	10	1714476	4.70002e-07	450700	0.000957483	ukb-b-20544	TRUE	reported	igd	2	TRUE
Nervous feelings	rs72845238	C	T	C	T	0.00527767	0.0277	0.1925	0.2253	FALSE	FALSE	FALSE	finn-b-I9_ICH	17	61359262	0.0419	NA	0.508	Intracerebral haemmorrhage || id:finn-b-I9_ICH	Intracerebral haemmorrhage	Intracerebral haemmorrhage || ||	TRUE	igd	NA	NA	NA	NA	NA	NA	NA	17	61359262	2.90001e-06	450700	0.00112742	ukb-b-20544	TRUE	reported	igd	2	TRUE
Nervous feelings	rs7299538	T	C	T	C	-0.00442312	0.0118	0.321718	0.2972	FALSE	FALSE	FALSE	finn-b-I9_ICH	12	46085330	0.0387	NA	0.759899	Intracerebral haemmorrhage || id:finn-b-I9_ICH	Intracerebral haemmorrhage	Intracerebral haemmorrhage || ||	TRUE	igd	NA	NA	NA	NA	NA	NA	NA	12	46085330	3.29997e-06	450700	0.00095132	ukb-b-20544	TRUE	reported	igd	2	TRUE
Nervous feelings	rs73002120	A	C	A	C	-0.00590628	-0.0192	0.169691	0.165	FALSE	FALSE	FALSE	finn-b-I9_ICH	1	118091602	0.0473	NA	0.6854	Intracerebral haemmorrhage || id:finn-b-I9_ICH	Intracerebral haemmorrhage	Intracerebral haemmorrhage || ||	TRUE	igd	NA	NA	NA	NA	NA	NA	NA	1	118091602	6.29999e-07	450700	0.00118567	ukb-b-20544	TRUE	reported	igd	2	TRUE
Nervous feelings	rs73032079	A	G	A	G	-0.00952988	0.1222	0.062006	0.06006	FALSE	FALSE	FALSE	finn-b-I9_ICH	11	133792743	0.0746	NA	0.1017	Intracerebral haemmorrhage || id:finn-b-I9_ICH	Intracerebral haemmorrhage	Intracerebral haemmorrhage || ||	TRUE	igd	NA	NA	NA	NA	NA	NA	NA	11	133792743	3.2e-07	450700	0.00186401	ukb-b-20544	TRUE	reported	igd	2	TRUE
Nervous feelings	rs730356	A	T	A	T	-0.00624073	-0.0255	0.210306	0.1121	FALSE	TRUE	FALSE	finn-b-I9_ICH	2	148537061	0.0562	NA	0.649999	Intracerebral haemmorrhage || id:finn-b-I9_ICH	Intracerebral haemmorrhage	Intracerebral haemmorrhage || ||	TRUE	igd	NA	NA	NA	NA	NA	NA	NA	2	148537061	1.2e-08	450700	0.00109582	ukb-b-20544	TRUE	reported	igd	2	TRUE
Nervous feelings	rs73180573	T	A	T	A	-0.00665941	-0.0111	0.230372	0.1768	FALSE	TRUE	FALSE	finn-b-I9_ICH	7	82789591	0.0461	NA	0.8092	Intracerebral haemmorrhage || id:finn-b-I9_ICH	Intracerebral haemmorrhage	Intracerebral haemmorrhage || ||	TRUE	igd	NA	NA	NA	NA	NA	NA	NA	7	82789591	2.80001e-10	450700	0.00105581	ukb-b-20544	TRUE	reported	igd	2	TRUE
Nervous feelings	rs7404193	G	T	G	T	0.00604974	0.0013	0.836265	0.8659	FALSE	FALSE	FALSE	finn-b-I9_ICH	16	16911748	0.052	NA	0.98	Intracerebral haemmorrhage || id:finn-b-I9_ICH	Intracerebral haemmorrhage	Intracerebral haemmorrhage || ||	TRUE	igd	NA	NA	NA	NA	NA	NA	NA	16	16911748	6.4e-07	450700	0.001215	ukb-b-20544	TRUE	reported	igd	2	TRUE
Nervous feelings	rs745570	G	A	G	A	0.00433657	0.0242	0.513855	0.5063	FALSE	FALSE	FALSE	finn-b-I9_ICH	17	77781725	0.0351	NA	0.4912	Intracerebral haemmorrhage || id:finn-b-I9_ICH	Intracerebral haemmorrhage	Intracerebral haemmorrhage || ||	TRUE	igd	NA	NA	NA	NA	NA	NA	NA	17	77781725	1.09999e-06	450700	0.000888815	ukb-b-20544	TRUE	reported	igd	2	TRUE
Nervous feelings	rs7461045	T	G	T	G	-0.00513803	-0.0153	0.782259	0.7404	FALSE	FALSE	FALSE	finn-b-I9_ICH	8	54573305	0.0399	NA	0.7026	Intracerebral haemmorrhage || id:finn-b-I9_ICH	Intracerebral haemmorrhage	Intracerebral haemmorrhage || ||	TRUE	igd	NA	NA	NA	NA	NA	NA	NA	8	54573305	2e-06	450700	0.00108166	ukb-b-20544	TRUE	reported	igd	2	TRUE
Nervous feelings	rs7512508	A	G	A	G	0.00424742	0.0476	0.507416	0.5442	FALSE	FALSE	FALSE	finn-b-I9_ICH	1	188069997	0.0353	NA	0.1772	Intracerebral haemmorrhage || id:finn-b-I9_ICH	Intracerebral haemmorrhage	Intracerebral haemmorrhage || ||	TRUE	igd	NA	NA	NA	NA	NA	NA	NA	1	188069997	1.79999e-06	450700	0.000889658	ukb-b-20544	TRUE	reported	igd	2	TRUE
Nervous feelings	rs7518221	C	T	C	T	0.00605204	0.0068	0.647259	0.626	FALSE	FALSE	FALSE	finn-b-I9_ICH	1	225561346	0.0365	NA	0.8517	Intracerebral haemmorrhage || id:finn-b-I9_ICH	Intracerebral haemmorrhage	Intracerebral haemmorrhage || ||	TRUE	igd	NA	NA	NA	NA	NA	NA	NA	1	225561346	8.00018e-11	450700	0.000930956	ukb-b-20544	TRUE	reported	igd	2	TRUE
Nervous feelings	rs75344028	A	G	A	G	-0.0156807	-0.0795	0.024685	0.008108	FALSE	FALSE	FALSE	finn-b-I9_ICH	2	212334445	0.2023	NA	0.694201	Intracerebral haemmorrhage || id:finn-b-I9_ICH	Intracerebral haemmorrhage	Intracerebral haemmorrhage || ||	TRUE	igd	NA	NA	NA	NA	NA	NA	NA	2	212334445	4.09996e-08	450700	0.00285815	ukb-b-20544	TRUE	reported	igd	2	TRUE
Nervous feelings	rs7567451	T	G	T	G	0.00514623	0.0393	0.730512	0.7405	FALSE	FALSE	FALSE	finn-b-I9_ICH	2	157053380	0.0402	NA	0.3285	Intracerebral haemmorrhage || id:finn-b-I9_ICH	Intracerebral haemmorrhage	Intracerebral haemmorrhage || ||	TRUE	igd	NA	NA	NA	NA	NA	NA	NA	2	157053380	2.80001e-07	450700	0.00100243	ukb-b-20544	TRUE	reported	igd	2	TRUE
Nervous feelings	rs7587246	G	A	G	A	0.00563499	0.0615	0.24339	0.3383	FALSE	FALSE	FALSE	finn-b-I9_ICH	2	213116085	0.0372	NA	0.0981002	Intracerebral haemmorrhage || id:finn-b-I9_ICH	Intracerebral haemmorrhage	Intracerebral haemmorrhage || ||	TRUE	igd	NA	NA	NA	NA	NA	NA	NA	2	213116085	5.99998e-08	450700	0.00103972	ukb-b-20544	TRUE	reported	igd	2	TRUE
Nervous feelings	rs76794231	G	C	G	C	0.00825668	0.1547	0.066218	0.04754	FALSE	TRUE	FALSE	finn-b-I9_ICH	1	231089053	0.083	NA	0.0624496	Intracerebral haemmorrhage || id:finn-b-I9_ICH	Intracerebral haemmorrhage	Intracerebral haemmorrhage || ||	TRUE	igd	NA	NA	NA	NA	NA	NA	NA	1	231089053	4.20001e-06	450700	0.00179383	ukb-b-20544	TRUE	reported	igd	2	TRUE
Nervous feelings	rs76927858	G	T	G	T	0.00897906	-0.01	0.063915	0.07751	FALSE	FALSE	FALSE	finn-b-I9_ICH	22	29434285	0.0659	NA	0.8799	Intracerebral haemmorrhage || id:finn-b-I9_ICH	Intracerebral haemmorrhage	Intracerebral haemmorrhage || ||	TRUE	igd	NA	NA	NA	NA	NA	NA	NA	22	29434285	1.5e-06	450700	0.00186414	ukb-b-20544	TRUE	reported	igd	2	TRUE
Nervous feelings	rs76981176	C	T	C	T	0.00536047	-0.0343	0.191925	0.1169	FALSE	FALSE	FALSE	finn-b-I9_ICH	6	6123261	0.0548	NA	0.5308	Intracerebral haemmorrhage || id:finn-b-I9_ICH	Intracerebral haemmorrhage	Intracerebral haemmorrhage || ||	TRUE	igd	NA	NA	NA	NA	NA	NA	NA	6	6123261	2.59998e-06	450700	0.00114045	ukb-b-20544	TRUE	reported	igd	2	TRUE
Nervous feelings	rs77165542	T	C	T	C	0.0115536	-0.3158	0.035521	0.01729	FALSE	FALSE	FALSE	finn-b-I9_ICH	2	430975	0.1359	NA	0.0201799	Intracerebral haemmorrhage || id:finn-b-I9_ICH	Intracerebral haemmorrhage	Intracerebral haemmorrhage || ||	TRUE	igd	NA	NA	NA	NA	NA	NA	NA	2	430975	2e-06	450700	0.00243029	ukb-b-20544	TRUE	reported	igd	2	TRUE
Nervous feelings	rs7732015	C	T	C	T	0.00454178	-0.0334	0.517432	0.4761	FALSE	FALSE	FALSE	finn-b-I9_ICH	5	77145740	0.0352	NA	0.3431	Intracerebral haemmorrhage || id:finn-b-I9_ICH	Intracerebral haemmorrhage	Intracerebral haemmorrhage || ||	TRUE	igd	NA	NA	NA	NA	NA	NA	NA	5	77145740	3.2e-07	450700	0.000888915	ukb-b-20544	TRUE	reported	igd	2	TRUE
Nervous feelings	rs77545256	G	A	G	A	0.007416	0.0499	0.09325	0.06347	FALSE	FALSE	FALSE	finn-b-I9_ICH	18	69122883	0.0724	NA	0.4902	Intracerebral haemmorrhage || id:finn-b-I9_ICH	Intracerebral haemmorrhage	Intracerebral haemmorrhage || ||	TRUE	igd	NA	NA	NA	NA	NA	NA	NA	18	69122883	1.40001e-06	450700	0.00153535	ukb-b-20544	TRUE	reported	igd	2	TRUE
Nervous feelings	rs77569645	T	G	T	G	0.00543945	-0.0303	0.224505	0.2655	FALSE	FALSE	FALSE	finn-b-I9_ICH	5	164241637	0.04	NA	0.4481	Intracerebral haemmorrhage || id:finn-b-I9_ICH	Intracerebral haemmorrhage	Intracerebral haemmorrhage || ||	TRUE	igd	NA	NA	NA	NA	NA	NA	NA	5	164241637	3.29997e-07	450700	0.00106591	ukb-b-20544	TRUE	reported	igd	2	TRUE
Nervous feelings	rs77587063	A	G	A	G	0.00674305	-0.1253	0.1119	0.1507	FALSE	FALSE	FALSE	finn-b-I9_ICH	12	78815592	0.0491	NA	0.01078	Intracerebral haemmorrhage || id:finn-b-I9_ICH	Intracerebral haemmorrhage	Intracerebral haemmorrhage || ||	TRUE	igd	NA	NA	NA	NA	NA	NA	NA	12	78815592	2.30001e-06	450700	0.00142582	ukb-b-20544	TRUE	reported	igd	2	TRUE
Nervous feelings	rs78260322	G	A	G	A	0.00674823	0.0898	0.106906	0.07839	FALSE	FALSE	FALSE	finn-b-I9_ICH	2	86793198	0.0658	NA	0.1724	Intracerebral haemmorrhage || id:finn-b-I9_ICH	Intracerebral haemmorrhage	Intracerebral haemmorrhage || ||	TRUE	igd	NA	NA	NA	NA	NA	NA	NA	2	86793198	2.80001e-06	450700	0.00143984	ukb-b-20544	TRUE	reported	igd	2	TRUE
Nervous feelings	rs78671882	T	C	T	C	0.00782845	-0.0237	0.105353	0.1409	FALSE	FALSE	FALSE	finn-b-I9_ICH	3	50412945	0.0506	NA	0.64	Intracerebral haemmorrhage || id:finn-b-I9_ICH	Intracerebral haemmorrhage	Intracerebral haemmorrhage || ||	TRUE	igd	TRUE	rs78671882	rs2071802	T	C	G	A	3	50411188	9.29994e-08	450700	0.00146587	ukb-b-20544	TRUE	reported	igd	2	TRUE
Nervous feelings	rs7872863	C	T	C	T	0.00484216	-0.0233	0.288984	0.2582	FALSE	FALSE	FALSE	finn-b-I9_ICH	9	96392815	0.0401	NA	0.5622	Intracerebral haemmorrhage || id:finn-b-I9_ICH	Intracerebral haemmorrhage	Intracerebral haemmorrhage || ||	TRUE	igd	NA	NA	NA	NA	NA	NA	NA	9	96392815	8.40001e-07	450700	0.000983098	ukb-b-20544	TRUE	reported	igd	2	TRUE
Nervous feelings	rs7913682	A	T	A	T	-0.00726336	0.0271	0.385321	0.3825	FALSE	TRUE	FALSE	finn-b-I9_ICH	10	104704017	0.0361	NA	0.4542	Intracerebral haemmorrhage || id:finn-b-I9_ICH	Intracerebral haemmorrhage	Intracerebral haemmorrhage || ||	TRUE	igd	TRUE	rs7913682	rs4919695	A	T	G	A	10	104684392	2.90001e-15	450700	0.000920218	ukb-b-20544	TRUE	reported	igd	2	TRUE
Nervous feelings	rs79141685	T	C	T	C	0.00791017	-0.0229	0.07828	0.06638	FALSE	FALSE	FALSE	finn-b-I9_ICH	3	183657637	0.0714	NA	0.7487	Intracerebral haemmorrhage || id:finn-b-I9_ICH	Intracerebral haemmorrhage	Intracerebral haemmorrhage || ||	TRUE	igd	NA	NA	NA	NA	NA	NA	NA	3	183657637	2.5e-06	450700	0.00167929	ukb-b-20544	TRUE	reported	igd	2	TRUE
Nervous feelings	rs7939264	G	A	G	A	-0.00544897	0.0117	0.767559	0.6818	FALSE	FALSE	FALSE	finn-b-I9_ICH	11	73364733	0.0378	NA	0.7571	Intracerebral haemmorrhage || id:finn-b-I9_ICH	Intracerebral haemmorrhage	Intracerebral haemmorrhage || ||	TRUE	igd	NA	NA	NA	NA	NA	NA	NA	11	73364733	2.80001e-07	450700	0.00106087	ukb-b-20544	TRUE	reported	igd	2	TRUE
Nervous feelings	rs8010355	G	A	G	A	0.00504792	-0.1048	0.755477	0.7033	FALSE	FALSE	FALSE	finn-b-I9_ICH	14	85501928	0.0386	NA	0.006663	Intracerebral haemmorrhage || id:finn-b-I9_ICH	Intracerebral haemmorrhage	Intracerebral haemmorrhage || ||	TRUE	igd	NA	NA	NA	NA	NA	NA	NA	14	85501928	1.40001e-06	450700	0.00104623	ukb-b-20544	TRUE	reported	igd	2	TRUE
Nervous feelings	rs847356	A	G	A	G	-0.00475877	0.0045	0.528779	0.5613	FALSE	FALSE	FALSE	finn-b-I9_ICH	14	72780987	0.0354	NA	0.8997	Intracerebral haemmorrhage || id:finn-b-I9_ICH	Intracerebral haemmorrhage	Intracerebral haemmorrhage || ||	TRUE	igd	NA	NA	NA	NA	NA	NA	NA	14	72780987	9.80009e-08	450700	0.000892791	ukb-b-20544	TRUE	reported	igd	2	TRUE
Nervous feelings	rs861303	T	C	T	C	-0.00466421	0.0006	0.714029	0.663	FALSE	FALSE	FALSE	finn-b-I9_ICH	3	62574621	0.0374	NA	0.9879	Intracerebral haemmorrhage || id:finn-b-I9_ICH	Intracerebral haemmorrhage	Intracerebral haemmorrhage || ||	TRUE	igd	NA	NA	NA	NA	NA	NA	NA	3	62574621	2.39999e-06	450700	0.000988896	ukb-b-20544	TRUE	reported	igd	2	TRUE
Nervous feelings	rs908671	G	C	G	C	0.00457589	0.0424	0.285542	0.2041	FALSE	TRUE	FALSE	finn-b-I9_ICH	2	172690265	0.0438	NA	0.3329	Intracerebral haemmorrhage || id:finn-b-I9_ICH	Intracerebral haemmorrhage	Intracerebral haemmorrhage || ||	TRUE	igd	NA	NA	NA	NA	NA	NA	NA	2	172690265	3.40001e-06	450700	0.000985164	ukb-b-20544	TRUE	reported	igd	2	TRUE
Nervous feelings	rs9263868	A	G	A	G	0.0061611	0.0403	0.177597	0.1499	FALSE	FALSE	FALSE	finn-b-I9_ICH	6	31168397	0.0495	NA	0.4152	Intracerebral haemmorrhage || id:finn-b-I9_ICH	Intracerebral haemmorrhage	Intracerebral haemmorrhage || ||	TRUE	igd	NA	NA	NA	NA	NA	NA	NA	6	31168397	1.2e-07	450700	0.00116481	ukb-b-20544	TRUE	reported	igd	2	TRUE
Nervous feelings	rs9388490	T	C	T	C	-0.00528094	0.015	0.440002	0.4379	FALSE	FALSE	FALSE	finn-b-I9_ICH	6	126704795	0.0353	NA	0.6707	Intracerebral haemmorrhage || id:finn-b-I9_ICH	Intracerebral haemmorrhage	Intracerebral haemmorrhage || ||	TRUE	igd	NA	NA	NA	NA	NA	NA	NA	6	126704795	3.89996e-09	450700	0.000897132	ukb-b-20544	TRUE	reported	igd	2	TRUE
Nervous feelings	rs9468500	T	A	T	A	0.00973945	0.0478	0.05976	0.03895	FALSE	TRUE	FALSE	finn-b-I9_ICH	6	29210998	0.091	NA	0.5994	Intracerebral haemmorrhage || id:finn-b-I9_ICH	Intracerebral haemmorrhage	Intracerebral haemmorrhage || ||	TRUE	igd	NA	NA	NA	NA	NA	NA	NA	6	29210998	2.1e-07	450700	0.00187489	ukb-b-20544	TRUE	reported	igd	2	TRUE
Nervous feelings	rs957448	G	A	G	A	0.00489504	0.0146	0.235483	0.3728	FALSE	FALSE	FALSE	finn-b-I9_ICH	8	95541302	0.0363	NA	0.688201	Intracerebral haemmorrhage || id:finn-b-I9_ICH	Intracerebral haemmorrhage	Intracerebral haemmorrhage || ||	TRUE	igd	NA	NA	NA	NA	NA	NA	NA	8	95541302	2.90001e-06	450700	0.00104608	ukb-b-20544	TRUE	reported	igd	2	TRUE
Nervous feelings	rs9581842	C	G	C	G	-0.00516856	-0.0446	0.207599	0.2595	FALSE	TRUE	FALSE	finn-b-I9_ICH	13	27978953	0.0401	NA	0.2657	Intracerebral haemmorrhage || id:finn-b-I9_ICH	Intracerebral haemmorrhage	Intracerebral haemmorrhage || ||	TRUE	igd	NA	NA	NA	NA	NA	NA	NA	13	27978953	2.5e-06	450700	0.0010987	ukb-b-20544	TRUE	reported	igd	2	TRUE
Nervous feelings	rs9591897	T	C	T	C	-0.00690159	-0.0304	0.219774	0.273	FALSE	FALSE	FALSE	finn-b-I9_ICH	13	59131117	0.0393	NA	0.4392	Intracerebral haemmorrhage || id:finn-b-I9_ICH	Intracerebral haemmorrhage	Intracerebral haemmorrhage || ||	TRUE	igd	NA	NA	NA	NA	NA	NA	NA	13	59131117	1.40001e-10	450700	0.00107519	ukb-b-20544	TRUE	reported	igd	2	TRUE
Nervous feelings	rs974711	A	G	A	G	0.00584379	0.0103	0.455028	0.4969	FALSE	FALSE	FALSE	finn-b-I9_ICH	4	90737327	0.0352	NA	0.77	Intracerebral haemmorrhage || id:finn-b-I9_ICH	Intracerebral haemmorrhage	Intracerebral haemmorrhage || ||	TRUE	igd	NA	NA	NA	NA	NA	NA	NA	4	90737327	5.79963e-11	450700	0.000892199	ukb-b-20544	TRUE	reported	igd	2	TRUE
Nervous feelings	rs9882445	T	C	T	C	-0.00427079	0.0115	0.533646	0.5602	FALSE	FALSE	FALSE	finn-b-I9_ICH	3	61613707	0.0355	NA	0.7466	Intracerebral haemmorrhage || id:finn-b-I9_ICH	Intracerebral haemmorrhage	Intracerebral haemmorrhage || ||	TRUE	igd	NA	NA	NA	NA	NA	NA	NA	3	61613707	1.7e-06	450700	0.000892013	ukb-b-20544	TRUE	reported	igd	2	TRUE
Nervous feelings	rs9925434	C	A	C	A	-0.00497838	0.0477	0.384585	0.319	FALSE	FALSE	FALSE	finn-b-I9_ICH	16	7666407	0.0378	NA	0.2077	Intracerebral haemmorrhage || id:finn-b-I9_ICH	Intracerebral haemmorrhage	Intracerebral haemmorrhage || ||	TRUE	igd	NA	NA	NA	NA	NA	NA	NA	16	7666407	6.59994e-08	450700	0.000921596	ukb-b-20544	TRUE	reported	igd	2	TRUE
Sensitivity / hurt feelings	rs10100612	C	G	C	G	0.00524048	0.0207	0.306126	0.359	FALSE	TRUE	FALSE	finn-b-I9_ICH	8	4937051	0.0366	NA	0.5724	Intracerebral haemmorrhage || id:finn-b-I9_ICH	Intracerebral haemmorrhage	Intracerebral haemmorrhage || ||	TRUE	igd	NA	NA	NA	NA	NA	NA	NA	8	4937051	2.59998e-06	449419	0.00111556	ukb-b-9981	TRUE	reported	igd	2	TRUE
Sensitivity / hurt feelings	rs1010714	A	T	A	T	0.00481444	0.0426	0.597319	0.6768	FALSE	TRUE	FALSE	finn-b-I9_ICH	6	152622876	0.0378	NA	0.2597	Intracerebral haemmorrhage || id:finn-b-I9_ICH	Intracerebral haemmorrhage	Intracerebral haemmorrhage || ||	TRUE	igd	NA	NA	NA	NA	NA	NA	NA	6	152622876	4.20001e-06	449419	0.00104641	ukb-b-9981	TRUE	reported	igd	2	TRUE
Sensitivity / hurt feelings	rs10119773	G	A	G	A	0.00605983	-0.0158	0.536596	0.5091	FALSE	FALSE	FALSE	finn-b-I9_ICH	9	23736400	0.0354	NA	0.6548	Intracerebral haemmorrhage || id:finn-b-I9_ICH	Intracerebral haemmorrhage	Intracerebral haemmorrhage || ||	TRUE	igd	NA	NA	NA	NA	NA	NA	NA	9	23736400	5.39995e-09	449419	0.00103874	ukb-b-9981	TRUE	reported	igd	2	TRUE
Sensitivity / hurt feelings	rs10849570	T	C	T	C	-0.00632557	-0.0629	0.825442	0.8805	FALSE	FALSE	FALSE	finn-b-I9_ICH	12	970800	0.0547	NA	0.2498	Intracerebral haemmorrhage || id:finn-b-I9_ICH	Intracerebral haemmorrhage	Intracerebral haemmorrhage || ||	TRUE	igd	NA	NA	NA	NA	NA	NA	NA	12	970800	2.99999e-06	449419	0.00135472	ukb-b-9981	TRUE	reported	igd	2	TRUE
Sensitivity / hurt feelings	rs10850379	T	C	T	C	0.0066457	-0.0206	0.430111	0.3986	FALSE	FALSE	FALSE	finn-b-I9_ICH	12	110002777	0.0359	NA	0.5661	Intracerebral haemmorrhage || id:finn-b-I9_ICH	Intracerebral haemmorrhage	Intracerebral haemmorrhage || ||	TRUE	igd	NA	NA	NA	NA	NA	NA	NA	12	110002777	1.29999e-10	449419	0.00103489	ukb-b-9981	TRUE	reported	igd	2	TRUE
Sensitivity / hurt feelings	rs10854399	T	C	T	C	-0.00493949	0.0459	0.422169	0.4413	FALSE	FALSE	FALSE	finn-b-I9_ICH	21	41088442	0.0355	NA	0.1963	Intracerebral haemmorrhage || id:finn-b-I9_ICH	Intracerebral haemmorrhage	Intracerebral haemmorrhage || ||	TRUE	igd	NA	NA	NA	NA	NA	NA	NA	21	41088442	2.19999e-06	449419	0.00104322	ukb-b-9981	TRUE	reported	igd	2	TRUE
Sensitivity / hurt feelings	rs10950533	A	C	A	C	-0.00605252	-0.0492	0.738056	0.7353	FALSE	FALSE	FALSE	finn-b-I9_ICH	7	14697617	0.0399	NA	0.2176	Intracerebral haemmorrhage || id:finn-b-I9_ICH	Intracerebral haemmorrhage	Intracerebral haemmorrhage || ||	TRUE	igd	NA	NA	NA	NA	NA	NA	NA	7	14697617	2.19999e-07	449419	0.00116781	ukb-b-9981	TRUE	reported	igd	2	TRUE
Sensitivity / hurt feelings	rs10983660	C	A	C	A	0.00546651	-0.0473	0.253926	0.1827	FALSE	FALSE	FALSE	finn-b-I9_ICH	9	120220428	0.0455	NA	0.2981	Intracerebral haemmorrhage || id:finn-b-I9_ICH	Intracerebral haemmorrhage	Intracerebral haemmorrhage || ||	TRUE	igd	NA	NA	NA	NA	NA	NA	NA	9	120220428	3.69999e-06	449419	0.00118141	ukb-b-9981	TRUE	reported	igd	2	TRUE
Sensitivity / hurt feelings	rs11058562	C	T	C	T	-0.00531174	-0.0169	0.484915	0.5331	FALSE	FALSE	FALSE	finn-b-I9_ICH	12	123003317	0.0354	NA	0.6323	Intracerebral haemmorrhage || id:finn-b-I9_ICH	Intracerebral haemmorrhage	Intracerebral haemmorrhage || ||	TRUE	igd	NA	NA	NA	NA	NA	NA	NA	12	123003317	2.19999e-07	449419	0.00102501	ukb-b-9981	TRUE	reported	igd	2	TRUE
Sensitivity / hurt feelings	rs11090045	A	G	A	G	0.0055237	-0.0201	0.307309	0.3453	FALSE	FALSE	FALSE	finn-b-I9_ICH	22	41753603	0.037	NA	0.5866	Intracerebral haemmorrhage || id:finn-b-I9_ICH	Intracerebral haemmorrhage	Intracerebral haemmorrhage || ||	TRUE	igd	NA	NA	NA	NA	NA	NA	NA	22	41753603	9.29994e-07	449419	0.00112593	ukb-b-9981	TRUE	reported	igd	2	TRUE
Sensitivity / hurt feelings	rs11115972	A	G	A	G	0.00546763	0.0149	0.643757	0.5657	FALSE	FALSE	FALSE	finn-b-I9_ICH	12	84088557	0.0354	NA	0.6747	Intracerebral haemmorrhage || id:finn-b-I9_ICH	Intracerebral haemmorrhage	Intracerebral haemmorrhage || ||	TRUE	igd	NA	NA	NA	NA	NA	NA	NA	12	84088557	3.50002e-07	449419	0.00107305	ukb-b-9981	TRUE	reported	igd	2	TRUE
Sensitivity / hurt feelings	rs113206181	G	T	G	T	0.011986	-0.0491	0.063824	0.06541	FALSE	FALSE	FALSE	finn-b-I9_ICH	9	96279435	0.0712	NA	0.490601	Intracerebral haemmorrhage || id:finn-b-I9_ICH	Intracerebral haemmorrhage	Intracerebral haemmorrhage || ||	TRUE	igd	NA	NA	NA	NA	NA	NA	NA	9	96279435	1.2e-08	449419	0.00210289	ukb-b-9981	TRUE	reported	igd	2	TRUE
Sensitivity / hurt feelings	rs114742862	C	G	C	G	-0.0111355	0.4229	0.053479	0.01115	FALSE	TRUE	FALSE	finn-b-I9_ICH	5	93260123	0.1715	NA	0.0136499	Intracerebral haemmorrhage || id:finn-b-I9_ICH	Intracerebral haemmorrhage	Intracerebral haemmorrhage || ||	TRUE	igd	NA	NA	NA	NA	NA	NA	NA	5	93260123	1e-06	449419	0.00227684	ukb-b-9981	TRUE	reported	igd	2	TRUE
Sensitivity / hurt feelings	rs115790084	T	C	T	C	0.0125994	0.0021	0.039356	0.03836	FALSE	FALSE	FALSE	finn-b-I9_ICH	1	23655679	0.095	NA	0.9827	Intracerebral haemmorrhage || id:finn-b-I9_ICH	Intracerebral haemmorrhage	Intracerebral haemmorrhage || ||	TRUE	igd	NA	NA	NA	NA	NA	NA	NA	1	23655679	3.69999e-06	449419	0.00272302	ukb-b-9981	TRUE	reported	igd	2	TRUE
Sensitivity / hurt feelings	rs11624349	C	T	C	T	0.00599829	0.0551	0.202173	0.1868	FALSE	FALSE	FALSE	finn-b-I9_ICH	14	90118172	0.045	NA	0.2202	Intracerebral haemmorrhage || id:finn-b-I9_ICH	Intracerebral haemmorrhage	Intracerebral haemmorrhage || ||	TRUE	igd	NA	NA	NA	NA	NA	NA	NA	14	90118172	2.59998e-06	449419	0.00127595	ukb-b-9981	TRUE	reported	igd	2	TRUE
Sensitivity / hurt feelings	rs116274151	T	G	T	G	0.0124009	-0.1736	0.043183	0.04855	FALSE	FALSE	FALSE	finn-b-I9_ICH	3	1380834	0.0814	NA	0.0329003	Intracerebral haemmorrhage || id:finn-b-I9_ICH	Intracerebral haemmorrhage	Intracerebral haemmorrhage || ||	TRUE	igd	NA	NA	NA	NA	NA	NA	NA	3	1380834	1.09999e-06	449419	0.00254534	ukb-b-9981	TRUE	reported	igd	2	TRUE
Sensitivity / hurt feelings	rs11663050	G	T	G	T	-0.00945034	-0.0018	0.65473	0.7157	FALSE	FALSE	FALSE	finn-b-I9_ICH	18	35201153	0.0389	NA	0.9621	Intracerebral haemmorrhage || id:finn-b-I9_ICH	Intracerebral haemmorrhage	Intracerebral haemmorrhage || ||	TRUE	igd	NA	NA	NA	NA	NA	NA	NA	18	35201153	2.09991e-18	449419	0.0010797	ukb-b-9981	TRUE	reported	igd	2	TRUE
Sensitivity / hurt feelings	rs11693864	T	C	T	C	0.00517913	0.0256	0.661188	0.6707	FALSE	FALSE	FALSE	finn-b-I9_ICH	2	213657426	0.0374	NA	0.4935	Intracerebral haemmorrhage || id:finn-b-I9_ICH	Intracerebral haemmorrhage	Intracerebral haemmorrhage || ||	TRUE	igd	NA	NA	NA	NA	NA	NA	NA	2	213657426	1.7e-06	449419	0.00108262	ukb-b-9981	TRUE	reported	igd	2	TRUE
Sensitivity / hurt feelings	rs11750785	T	C	T	C	0.0071685	0.0139	0.155618	0.1967	FALSE	FALSE	FALSE	finn-b-I9_ICH	5	144082502	0.0441	NA	0.753101	Intracerebral haemmorrhage || id:finn-b-I9_ICH	Intracerebral haemmorrhage	Intracerebral haemmorrhage || ||	TRUE	igd	NA	NA	NA	NA	NA	NA	NA	5	144082502	4.30002e-07	449419	0.00141761	ukb-b-9981	TRUE	reported	igd	2	TRUE
Sensitivity / hurt feelings	rs11754396	T	G	T	G	-0.00591081	-0.0385	0.222704	0.1589	FALSE	FALSE	FALSE	finn-b-I9_ICH	6	33613777	0.0481	NA	0.4235	Intracerebral haemmorrhage || id:finn-b-I9_ICH	Intracerebral haemmorrhage	Intracerebral haemmorrhage || ||	TRUE	igd	NA	NA	NA	NA	NA	NA	NA	6	33613777	1.7e-06	449419	0.00123369	ukb-b-9981	TRUE	reported	igd	2	TRUE
Sensitivity / hurt feelings	rs11786456	G	A	G	A	-0.00528699	-0.0276	0.652823	0.6716	FALSE	FALSE	FALSE	finn-b-I9_ICH	8	35525147	0.0377	NA	0.4639	Intracerebral haemmorrhage || id:finn-b-I9_ICH	Intracerebral haemmorrhage	Intracerebral haemmorrhage || ||	TRUE	igd	NA	NA	NA	NA	NA	NA	NA	8	35525147	1e-06	449419	0.00108164	ukb-b-9981	TRUE	reported	igd	2	TRUE
Sensitivity / hurt feelings	rs12125336	T	C	T	C	0.00561534	-0.02	0.277157	0.2824	FALSE	FALSE	FALSE	finn-b-I9_ICH	1	72692630	0.039	NA	0.6086	Intracerebral haemmorrhage || id:finn-b-I9_ICH	Intracerebral haemmorrhage	Intracerebral haemmorrhage || ||	TRUE	igd	NA	NA	NA	NA	NA	NA	NA	1	72692630	9.69996e-07	449419	0.00114636	ukb-b-9981	TRUE	reported	igd	2	TRUE
Sensitivity / hurt feelings	rs12187018	A	G	A	G	0.0104533	0.0773	0.059893	0.03739	FALSE	FALSE	FALSE	finn-b-I9_ICH	5	87412600	0.0923	NA	0.4028	Intracerebral haemmorrhage || id:finn-b-I9_ICH	Intracerebral haemmorrhage	Intracerebral haemmorrhage || ||	TRUE	igd	NA	NA	NA	NA	NA	NA	NA	5	87412600	1.6e-06	449419	0.00217714	ukb-b-9981	TRUE	reported	igd	2	TRUE
Sensitivity / hurt feelings	rs1231368	T	C	T	C	-0.00823879	0.0782	0.880384	0.8926	FALSE	FALSE	FALSE	finn-b-I9_ICH	9	25753617	0.0568	NA	0.1681	Intracerebral haemmorrhage || id:finn-b-I9_ICH	Intracerebral haemmorrhage	Intracerebral haemmorrhage || ||	TRUE	igd	NA	NA	NA	NA	NA	NA	NA	9	25753617	1.79999e-07	449419	0.00157949	ukb-b-9981	TRUE	reported	igd	2	TRUE
Sensitivity / hurt feelings	rs12339475	T	C	T	C	-0.00567679	-0.1068	0.290429	0.4284	FALSE	FALSE	FALSE	finn-b-I9_ICH	9	114958587	0.0356	NA	0.002712	Intracerebral haemmorrhage || id:finn-b-I9_ICH	Intracerebral haemmorrhage	Intracerebral haemmorrhage || ||	TRUE	igd	NA	NA	NA	NA	NA	NA	NA	9	114958587	5.1e-07	449419	0.00112988	ukb-b-9981	TRUE	reported	igd	2	TRUE
Sensitivity / hurt feelings	rs12710642	C	T	C	T	0.00575441	0.0011	0.488956	0.4186	FALSE	FALSE	FALSE	finn-b-I9_ICH	2	17494738	0.0356	NA	0.9745	Intracerebral haemmorrhage || id:finn-b-I9_ICH	Intracerebral haemmorrhage	Intracerebral haemmorrhage || ||	TRUE	igd	NA	NA	NA	NA	NA	NA	NA	2	17494738	2e-08	449419	0.00102601	ukb-b-9981	TRUE	reported	igd	2	TRUE
Sensitivity / hurt feelings	rs12713044	A	G	A	G	-0.00496851	-0.0198	0.383424	0.3076	FALSE	FALSE	FALSE	finn-b-I9_ICH	2	49480056	0.038	NA	0.603	Intracerebral haemmorrhage || id:finn-b-I9_ICH	Intracerebral haemmorrhage	Intracerebral haemmorrhage || ||	TRUE	igd	NA	NA	NA	NA	NA	NA	NA	2	49480056	2.39999e-06	449419	0.00105365	ukb-b-9981	TRUE	reported	igd	2	TRUE
Sensitivity / hurt feelings	rs1282545	C	T	C	T	0.00507952	-0.0366	0.428572	0.4731	FALSE	FALSE	FALSE	finn-b-I9_ICH	3	107199709	0.0354	NA	0.3019	Intracerebral haemmorrhage || id:finn-b-I9_ICH	Intracerebral haemmorrhage	Intracerebral haemmorrhage || ||	TRUE	igd	NA	NA	NA	NA	NA	NA	NA	3	107199709	1.09999e-06	449419	0.00104241	ukb-b-9981	TRUE	reported	igd	2	TRUE
Sensitivity / hurt feelings	rs12861084	T	C	T	C	-0.0201531	-0.2386	0.01496	0.006639	FALSE	FALSE	FALSE	finn-b-I9_ICH	13	108157090	0.223	NA	0.2846	Intracerebral haemmorrhage || id:finn-b-I9_ICH	Intracerebral haemmorrhage	Intracerebral haemmorrhage || ||	TRUE	igd	NA	NA	NA	NA	NA	NA	NA	13	108157090	2e-06	449419	0.00424382	ukb-b-9981	TRUE	reported	igd	2	TRUE
Sensitivity / hurt feelings	rs12933611	G	T	G	T	0.00605275	0.0601	0.376067	0.3954	FALSE	FALSE	FALSE	finn-b-I9_ICH	16	13765383	0.0358	NA	0.0932095	Intracerebral haemmorrhage || id:finn-b-I9_ICH	Intracerebral haemmorrhage	Intracerebral haemmorrhage || ||	TRUE	igd	NA	NA	NA	NA	NA	NA	NA	16	13765383	1.2e-08	449419	0.00106132	ukb-b-9981	TRUE	reported	igd	2	TRUE
Sensitivity / hurt feelings	rs12968122	T	C	T	C	-0.0052113	-0.0015	0.288979	0.3584	FALSE	FALSE	FALSE	finn-b-I9_ICH	18	63589770	0.0368	NA	0.9666	Intracerebral haemmorrhage || id:finn-b-I9_ICH	Intracerebral haemmorrhage	Intracerebral haemmorrhage || ||	TRUE	igd	NA	NA	NA	NA	NA	NA	NA	18	63589770	4.20001e-06	449419	0.00113199	ukb-b-9981	TRUE	reported	igd	2	TRUE
Sensitivity / hurt feelings	rs12972366	G	A	G	A	-0.0059243	-0.001	0.254775	0.2212	FALSE	FALSE	FALSE	finn-b-I9_ICH	19	4920414	0.0426	NA	0.9821	Intracerebral haemmorrhage || id:finn-b-I9_ICH	Intracerebral haemmorrhage	Intracerebral haemmorrhage || ||	TRUE	igd	NA	NA	NA	NA	NA	NA	NA	19	4920414	5.89997e-07	449419	0.00118643	ukb-b-9981	TRUE	reported	igd	2	TRUE
Sensitivity / hurt feelings	rs13196360	T	C	T	C	0.00506556	0.0315	0.507755	0.4372	FALSE	FALSE	FALSE	finn-b-I9_ICH	6	12009256	0.0355	NA	0.3751	Intracerebral haemmorrhage || id:finn-b-I9_ICH	Intracerebral haemmorrhage	Intracerebral haemmorrhage || ||	TRUE	igd	NA	NA	NA	NA	NA	NA	NA	6	12009256	8.30004e-07	449419	0.00102797	ukb-b-9981	TRUE	reported	igd	2	TRUE
Sensitivity / hurt feelings	rs1373529	G	T	G	T	-0.00561628	0.0015	0.414112	0.4761	FALSE	FALSE	FALSE	finn-b-I9_ICH	8	93201255	0.0351	NA	0.965	Intracerebral haemmorrhage || id:finn-b-I9_ICH	Intracerebral haemmorrhage	Intracerebral haemmorrhage || ||	TRUE	igd	NA	NA	NA	NA	NA	NA	NA	8	93201255	6.90001e-08	449419	0.00104111	ukb-b-9981	TRUE	reported	igd	2	TRUE
Sensitivity / hurt feelings	rs150354282	C	A	C	A	0.0163469	-0.3079	0.021276	0.007595	FALSE	FALSE	FALSE	finn-b-I9_ICH	11	84594077	0.2051	NA	0.1332	Intracerebral haemmorrhage || id:finn-b-I9_ICH	Intracerebral haemmorrhage	Intracerebral haemmorrhage || ||	TRUE	igd	NA	NA	NA	NA	NA	NA	NA	11	84594077	4.39997e-06	449419	0.00355866	ukb-b-9981	TRUE	reported	igd	2	TRUE
Sensitivity / hurt feelings	rs1536634	A	G	A	G	0.00471544	-0.0183	0.504296	0.5477	FALSE	FALSE	FALSE	finn-b-I9_ICH	13	36139473	0.0353	NA	0.604399	Intracerebral haemmorrhage || id:finn-b-I9_ICH	Intracerebral haemmorrhage	Intracerebral haemmorrhage || ||	TRUE	igd	NA	NA	NA	NA	NA	NA	NA	13	36139473	4.30002e-06	449419	0.00102568	ukb-b-9981	TRUE	reported	igd	2	TRUE
Sensitivity / hurt feelings	rs16981005	T	C	T	C	0.00695095	0.0338	0.167448	0.1317	FALSE	FALSE	FALSE	finn-b-I9_ICH	19	16074865	0.0524	NA	0.518601	Intracerebral haemmorrhage || id:finn-b-I9_ICH	Intracerebral haemmorrhage	Intracerebral haemmorrhage || ||	TRUE	igd	NA	NA	NA	NA	NA	NA	NA	19	16074865	5.19996e-07	449419	0.00138476	ukb-b-9981	TRUE	reported	igd	2	TRUE
Sensitivity / hurt feelings	rs17785382	G	A	G	A	-0.0057727	0.0688	0.405316	0.4329	FALSE	FALSE	FALSE	finn-b-I9_ICH	1	53707953	0.0353	NA	0.0516702	Intracerebral haemmorrhage || id:finn-b-I9_ICH	Intracerebral haemmorrhage	Intracerebral haemmorrhage || ||	TRUE	igd	NA	NA	NA	NA	NA	NA	NA	1	53707953	3.09999e-08	449419	0.00104322	ukb-b-9981	TRUE	reported	igd	2	TRUE
Sensitivity / hurt feelings	rs1849785	T	C	T	C	0.0052908	-0.0054	0.400947	0.3715	FALSE	FALSE	FALSE	finn-b-I9_ICH	12	43527723	0.0364	NA	0.8824	Intracerebral haemmorrhage || id:finn-b-I9_ICH	Intracerebral haemmorrhage	Intracerebral haemmorrhage || ||	TRUE	igd	NA	NA	NA	NA	NA	NA	NA	12	43527723	4.60002e-07	449419	0.00104951	ukb-b-9981	TRUE	reported	igd	2	TRUE
Sensitivity / hurt feelings	rs1854788	T	C	T	C	-0.00531124	-0.0654	0.445484	0.5385	FALSE	FALSE	FALSE	finn-b-I9_ICH	13	59085319	0.0352	NA	0.0631393	Intracerebral haemmorrhage || id:finn-b-I9_ICH	Intracerebral haemmorrhage	Intracerebral haemmorrhage || ||	TRUE	igd	NA	NA	NA	NA	NA	NA	NA	13	59085319	2.90001e-07	449419	0.00103495	ukb-b-9981	TRUE	reported	igd	2	TRUE
Sensitivity / hurt feelings	rs1856189	G	C	G	C	0.00496436	0.066	0.371054	0.3978	FALSE	TRUE	FALSE	finn-b-I9_ICH	9	33608541	0.036	NA	0.0665595	Intracerebral haemmorrhage || id:finn-b-I9_ICH	Intracerebral haemmorrhage	Intracerebral haemmorrhage || ||	TRUE	igd	NA	NA	NA	NA	NA	NA	NA	9	33608541	2.80001e-06	449419	0.00105998	ukb-b-9981	TRUE	reported	igd	2	TRUE
Sensitivity / hurt feelings	rs186532	C	A	C	A	-0.00494376	0.0272	0.609765	0.613	FALSE	FALSE	FALSE	finn-b-I9_ICH	18	49246292	0.0362	NA	0.4523	Intracerebral haemmorrhage || id:finn-b-I9_ICH	Intracerebral haemmorrhage	Intracerebral haemmorrhage || ||	TRUE	igd	NA	NA	NA	NA	NA	NA	NA	18	49246292	3.09999e-06	449419	0.00106026	ukb-b-9981	TRUE	reported	igd	2	TRUE
Sensitivity / hurt feelings	rs1933014	T	G	T	G	0.00750428	0.1216	0.137264	0.09873	FALSE	FALSE	FALSE	finn-b-I9_ICH	9	85173575	0.0592	NA	0.0398401	Intracerebral haemmorrhage || id:finn-b-I9_ICH	Intracerebral haemmorrhage	Intracerebral haemmorrhage || ||	TRUE	igd	NA	NA	NA	NA	NA	NA	NA	9	85173575	6.19998e-07	449419	0.00150577	ukb-b-9981	TRUE	reported	igd	2	TRUE
Sensitivity / hurt feelings	rs1978573	T	C	T	C	-0.00764497	-0.0923	0.300046	0.383	FALSE	FALSE	FALSE	finn-b-I9_ICH	2	185459544	0.0362	NA	0.01085	Intracerebral haemmorrhage || id:finn-b-I9_ICH	Intracerebral haemmorrhage	Intracerebral haemmorrhage || ||	TRUE	igd	NA	NA	NA	NA	NA	NA	NA	2	185459544	8.69961e-12	449419	0.00112002	ukb-b-9981	TRUE	reported	igd	2	TRUE
Sensitivity / hurt feelings	rs2033967	G	A	G	A	-0.00510656	-0.0232	0.535057	0.6131	FALSE	FALSE	FALSE	finn-b-I9_ICH	1	163764928	0.0362	NA	0.5218	Intracerebral haemmorrhage || id:finn-b-I9_ICH	Intracerebral haemmorrhage	Intracerebral haemmorrhage || ||	TRUE	igd	NA	NA	NA	NA	NA	NA	NA	1	163764928	7.19996e-07	449419	0.00103065	ukb-b-9981	TRUE	reported	igd	2	TRUE
Sensitivity / hurt feelings	rs2093623	A	G	A	G	-0.0055037	0.0336	0.496543	0.4771	FALSE	FALSE	FALSE	finn-b-I9_ICH	10	10922977	0.0352	NA	0.339	Intracerebral haemmorrhage || id:finn-b-I9_ICH	Intracerebral haemmorrhage	Intracerebral haemmorrhage || ||	TRUE	igd	NA	NA	NA	NA	NA	NA	NA	10	10922977	1e-07	449419	0.00103467	ukb-b-9981	TRUE	reported	igd	2	TRUE
Sensitivity / hurt feelings	rs2110983	T	G	T	G	0.00532293	-0.0227	0.37202	0.4079	FALSE	FALSE	FALSE	finn-b-I9_ICH	12	13890358	0.036	NA	0.5286	Intracerebral haemmorrhage || id:finn-b-I9_ICH	Intracerebral haemmorrhage	Intracerebral haemmorrhage || ||	TRUE	igd	NA	NA	NA	NA	NA	NA	NA	12	13890358	5.39995e-07	449419	0.00106224	ukb-b-9981	TRUE	reported	igd	2	TRUE
Sensitivity / hurt feelings	rs2113792	C	T	C	T	0.00729226	0.0796	0.435282	0.5287	FALSE	FALSE	FALSE	finn-b-I9_ICH	2	148641809	0.0352	NA	0.02398	Intracerebral haemmorrhage || id:finn-b-I9_ICH	Intracerebral haemmorrhage	Intracerebral haemmorrhage || ||	TRUE	igd	NA	NA	NA	NA	NA	NA	NA	2	148641809	1.9002e-12	449419	0.00103603	ukb-b-9981	TRUE	reported	igd	2	TRUE
Sensitivity / hurt feelings	rs217674	G	A	G	A	0.00837578	0.016	0.899986	0.9527	FALSE	FALSE	FALSE	finn-b-I9_ICH	14	62362776	0.0843	NA	0.8498	Intracerebral haemmorrhage || id:finn-b-I9_ICH	Intracerebral haemmorrhage	Intracerebral haemmorrhage || ||	TRUE	igd	NA	NA	NA	NA	NA	NA	NA	14	62362776	9.59997e-07	449419	0.00170967	ukb-b-9981	TRUE	reported	igd	2	TRUE
Sensitivity / hurt feelings	rs219226	C	T	C	T	-0.00615298	0.0023	0.75941	0.8435	FALSE	FALSE	FALSE	finn-b-I9_ICH	2	205014049	0.0488	NA	0.9632	Intracerebral haemmorrhage || id:finn-b-I9_ICH	Intracerebral haemmorrhage	Intracerebral haemmorrhage || ||	TRUE	igd	NA	NA	NA	NA	NA	NA	NA	2	205014049	2.99999e-07	449419	0.00120082	ukb-b-9981	TRUE	reported	igd	2	TRUE
Sensitivity / hurt feelings	rs2221883	A	G	A	G	-0.00612579	-0.0119	0.499614	0.5585	FALSE	FALSE	FALSE	finn-b-I9_ICH	3	110248674	0.0353	NA	0.7356	Intracerebral haemmorrhage || id:finn-b-I9_ICH	Intracerebral haemmorrhage	Intracerebral haemmorrhage || ||	TRUE	igd	NA	NA	NA	NA	NA	NA	NA	3	110248674	2.39999e-09	449419	0.0010265	ukb-b-9981	TRUE	reported	igd	2	TRUE
Sensitivity / hurt feelings	rs2228628	C	G	C	G	0.00634575	0.0117	0.265175	0.3638	FALSE	TRUE	FALSE	finn-b-I9_ICH	6	32088854	0.0368	NA	0.7516	Intracerebral haemmorrhage || id:finn-b-I9_ICH	Intracerebral haemmorrhage	Intracerebral haemmorrhage || ||	TRUE	igd	NA	NA	NA	NA	NA	NA	NA	6	32088854	4.39997e-08	449419	0.00115944	ukb-b-9981	TRUE	reported	igd	2	TRUE
Sensitivity / hurt feelings	rs2488401	T	C	T	C	-0.00799859	0.0282	0.206894	0.1445	FALSE	FALSE	FALSE	finn-b-I9_ICH	1	197702401	0.05	NA	0.5733	Intracerebral haemmorrhage || id:finn-b-I9_ICH	Intracerebral haemmorrhage	Intracerebral haemmorrhage || ||	TRUE	igd	NA	NA	NA	NA	NA	NA	NA	1	197702401	3.59998e-10	449419	0.00127548	ukb-b-9981	TRUE	reported	igd	2	TRUE
Sensitivity / hurt feelings	rs2643322	G	A	G	A	-0.00528804	-0.0189	0.678947	0.6849	FALSE	FALSE	FALSE	finn-b-I9_ICH	9	78885928	0.038	NA	0.6201	Intracerebral haemmorrhage || id:finn-b-I9_ICH	Intracerebral haemmorrhage	Intracerebral haemmorrhage || ||	TRUE	igd	NA	NA	NA	NA	NA	NA	NA	9	78885928	1.5e-06	449419	0.00109796	ukb-b-9981	TRUE	reported	igd	2	TRUE
Sensitivity / hurt feelings	rs2675625	A	C	A	C	0.00621166	0.0104	0.581155	0.5019	FALSE	FALSE	FALSE	finn-b-I9_ICH	10	63546950	0.0352	NA	0.7687	Intracerebral haemmorrhage || id:finn-b-I9_ICH	Intracerebral haemmorrhage	Intracerebral haemmorrhage || ||	TRUE	igd	NA	NA	NA	NA	NA	NA	NA	10	63546950	2.99999e-09	449419	0.00104693	ukb-b-9981	TRUE	reported	igd	2	TRUE
Sensitivity / hurt feelings	rs2737428	G	A	G	A	-0.00487489	0.0029	0.499704	0.4658	FALSE	FALSE	FALSE	finn-b-I9_ICH	8	134487602	0.0354	NA	0.9348	Intracerebral haemmorrhage || id:finn-b-I9_ICH	Intracerebral haemmorrhage	Intracerebral haemmorrhage || ||	TRUE	igd	NA	NA	NA	NA	NA	NA	NA	8	134487602	2.1e-06	449419	0.00102724	ukb-b-9981	TRUE	reported	igd	2	TRUE
Sensitivity / hurt feelings	rs2742986	C	T	C	T	0.00500124	-0.0008	0.368399	0.3076	FALSE	FALSE	FALSE	finn-b-I9_ICH	6	19086513	0.0382	NA	0.9824	Intracerebral haemmorrhage || id:finn-b-I9_ICH	Intracerebral haemmorrhage	Intracerebral haemmorrhage || ||	TRUE	igd	TRUE	rs2742986	rs1883172	C	T	G	A	6	19080191	2.69998e-06	449419	0.00106571	ukb-b-9981	TRUE	reported	igd	2	TRUE
Sensitivity / hurt feelings	rs2769689	C	T	C	T	-0.00618286	-0.026	0.716988	0.762	FALSE	FALSE	FALSE	finn-b-I9_ICH	1	225797957	0.0415	NA	0.5308	Intracerebral haemmorrhage || id:finn-b-I9_ICH	Intracerebral haemmorrhage	Intracerebral haemmorrhage || ||	TRUE	igd	NA	NA	NA	NA	NA	NA	NA	1	225797957	6.1e-08	449419	0.00114139	ukb-b-9981	TRUE	reported	igd	2	TRUE
Sensitivity / hurt feelings	rs28427480	C	A	C	A	0.0112172	-0.0635	0.093876	0.107	FALSE	FALSE	FALSE	finn-b-I9_ICH	9	98264942	0.0573	NA	0.2676	Intracerebral haemmorrhage || id:finn-b-I9_ICH	Intracerebral haemmorrhage	Intracerebral haemmorrhage || ||	TRUE	igd	NA	NA	NA	NA	NA	NA	NA	9	98264942	2e-10	449419	0.00176422	ukb-b-9981	TRUE	reported	igd	2	TRUE
Sensitivity / hurt feelings	rs28716277	C	T	C	T	-0.00620639	0.0219	0.345549	0.4398	FALSE	FALSE	FALSE	finn-b-I9_ICH	14	23604659	0.0359	NA	0.5407	Intracerebral haemmorrhage || id:finn-b-I9_ICH	Intracerebral haemmorrhage	Intracerebral haemmorrhage || ||	TRUE	igd	NA	NA	NA	NA	NA	NA	NA	14	23604659	1.29999e-08	449419	0.0010911	ukb-b-9981	TRUE	reported	igd	2	TRUE
Sensitivity / hurt feelings	rs298247	C	G	C	G	-0.00655975	-0.0085	0.167322	0.2041	FALSE	TRUE	FALSE	finn-b-I9_ICH	2	157233542	0.0437	NA	0.8454	Intracerebral haemmorrhage || id:finn-b-I9_ICH	Intracerebral haemmorrhage	Intracerebral haemmorrhage || ||	TRUE	igd	NA	NA	NA	NA	NA	NA	NA	2	157233542	1.79999e-06	449419	0.00137236	ukb-b-9981	TRUE	reported	igd	2	TRUE
Sensitivity / hurt feelings	rs3104181	C	G	C	G	0.0055432	0.0467	0.76104	0.8336	FALSE	TRUE	FALSE	finn-b-I9_ICH	6	170463064	0.0473	NA	0.324	Intracerebral haemmorrhage || id:finn-b-I9_ICH	Intracerebral haemmorrhage	Intracerebral haemmorrhage || ||	TRUE	igd	NA	NA	NA	NA	NA	NA	NA	6	170463064	4.09996e-06	449419	0.00120337	ukb-b-9981	TRUE	reported	igd	2	TRUE
Sensitivity / hurt feelings	rs3104546	C	T	C	T	0.00558329	0.0179	0.436268	0.5239	FALSE	FALSE	FALSE	finn-b-I9_ICH	9	128137669	0.0352	NA	0.610401	Intracerebral haemmorrhage || id:finn-b-I9_ICH	Intracerebral haemmorrhage	Intracerebral haemmorrhage || ||	TRUE	igd	NA	NA	NA	NA	NA	NA	NA	9	128137669	6.69993e-08	449419	0.00103414	ukb-b-9981	TRUE	reported	igd	2	TRUE
Sensitivity / hurt feelings	rs320697	A	G	A	G	-0.00556358	-0.0302	0.453845	0.4631	FALSE	FALSE	FALSE	finn-b-I9_ICH	7	137048213	0.0352	NA	0.3914	Intracerebral haemmorrhage || id:finn-b-I9_ICH	Intracerebral haemmorrhage	Intracerebral haemmorrhage || ||	TRUE	igd	NA	NA	NA	NA	NA	NA	NA	7	137048213	6.49995e-08	449419	0.0010294	ukb-b-9981	TRUE	reported	igd	2	TRUE
Sensitivity / hurt feelings	rs34277109	T	C	T	C	-0.00604382	-0.0726	0.649952	0.7337	FALSE	FALSE	FALSE	finn-b-I9_ICH	19	19520358	0.0399	NA	0.0685204	Intracerebral haemmorrhage || id:finn-b-I9_ICH	Intracerebral haemmorrhage	Intracerebral haemmorrhage || ||	TRUE	igd	TRUE	rs34277109	rs2916069	C	T	G	A	19	19487302	1.89998e-08	449419	0.00107546	ukb-b-9981	TRUE	reported	igd	2	TRUE
Sensitivity / hurt feelings	rs34894163	G	A	G	A	0.00539869	-0.0179	0.501621	0.4864	FALSE	FALSE	FALSE	finn-b-I9_ICH	11	28556277	0.0353	NA	0.611299	Intracerebral haemmorrhage || id:finn-b-I9_ICH	Intracerebral haemmorrhage	Intracerebral haemmorrhage || ||	TRUE	igd	NA	NA	NA	NA	NA	NA	NA	11	28556277	1.5e-07	449419	0.00102789	ukb-b-9981	TRUE	reported	igd	2	TRUE
Sensitivity / hurt feelings	rs35518360	T	A	T	A	0.0116645	-0.139	0.083318	0.02138	FALSE	TRUE	FALSE	finn-b-I9_ICH	4	103146890	0.1219	NA	0.2544	Intracerebral haemmorrhage || id:finn-b-I9_ICH	Intracerebral haemmorrhage	Intracerebral haemmorrhage || ||	TRUE	igd	NA	NA	NA	NA	NA	NA	NA	4	103146890	9.80009e-10	449419	0.00190846	ukb-b-9981	TRUE	reported	igd	2	TRUE
Sensitivity / hurt feelings	rs36006259	T	C	T	C	-0.00815933	0.0091	0.157743	0.1998	FALSE	FALSE	FALSE	finn-b-I9_ICH	14	30268871	0.0443	NA	0.8365	Intracerebral haemmorrhage || id:finn-b-I9_ICH	Intracerebral haemmorrhage	Intracerebral haemmorrhage || ||	TRUE	igd	NA	NA	NA	NA	NA	NA	NA	14	30268871	1.2e-08	449419	0.00142994	ukb-b-9981	TRUE	reported	igd	2	TRUE
Sensitivity / hurt feelings	rs3740393	C	G	C	G	-0.00753917	0.0082	0.137344	0.1527	FALSE	TRUE	FALSE	finn-b-I9_ICH	10	104636655	0.0492	NA	0.8674	Intracerebral haemmorrhage || id:finn-b-I9_ICH	Intracerebral haemmorrhage	Intracerebral haemmorrhage || ||	TRUE	igd	NA	NA	NA	NA	NA	NA	NA	10	104636655	4.30002e-07	449419	0.00149151	ukb-b-9981	TRUE	reported	igd	2	TRUE
Sensitivity / hurt feelings	rs3746506	A	G	A	G	-0.00539321	0.0337	0.61892	0.6427	FALSE	FALSE	FALSE	finn-b-I9_ICH	20	44586036	0.0368	NA	0.3591	Intracerebral haemmorrhage || id:finn-b-I9_ICH	Intracerebral haemmorrhage	Intracerebral haemmorrhage || ||	TRUE	igd	NA	NA	NA	NA	NA	NA	NA	20	44586036	3.09999e-07	449419	0.00105442	ukb-b-9981	TRUE	reported	igd	2	TRUE
Sensitivity / hurt feelings	rs3748400	T	C	T	C	-0.00705103	-0.0174	0.774281	0.7748	FALSE	FALSE	FALSE	finn-b-I9_ICH	16	87445839	0.0421	NA	0.6799	Intracerebral haemmorrhage || id:finn-b-I9_ICH	Intracerebral haemmorrhage	Intracerebral haemmorrhage || ||	TRUE	igd	NA	NA	NA	NA	NA	NA	NA	16	87445839	8.10009e-09	449419	0.00122279	ukb-b-9981	TRUE	reported	igd	2	TRUE
Sensitivity / hurt feelings	rs3759012	T	C	T	C	0.0057564	-0.0679	0.387606	0.4615	FALSE	FALSE	FALSE	finn-b-I9_ICH	11	118901262	0.0355	NA	0.0553796	Intracerebral haemmorrhage || id:finn-b-I9_ICH	Intracerebral haemmorrhage	Intracerebral haemmorrhage || ||	TRUE	igd	NA	NA	NA	NA	NA	NA	NA	11	118901262	4.39997e-08	449419	0.00105161	ukb-b-9981	TRUE	reported	igd	2	TRUE
Sensitivity / hurt feelings	rs3782196	A	G	A	G	0.00593902	-0.0482	0.194215	0.1641	FALSE	FALSE	FALSE	finn-b-I9_ICH	12	117675014	0.0475	NA	0.3102	Intracerebral haemmorrhage || id:finn-b-I9_ICH	Intracerebral haemmorrhage	Intracerebral haemmorrhage || ||	TRUE	igd	NA	NA	NA	NA	NA	NA	NA	12	117675014	4.70002e-06	449419	0.0012976	ukb-b-9981	TRUE	reported	igd	2	TRUE
Sensitivity / hurt feelings	rs380803	C	T	C	T	-0.00563214	0.013	0.722927	0.8318	FALSE	FALSE	FALSE	finn-b-I9_ICH	15	68161273	0.0472	NA	0.7837	Intracerebral haemmorrhage || id:finn-b-I9_ICH	Intracerebral haemmorrhage	Intracerebral haemmorrhage || ||	TRUE	igd	NA	NA	NA	NA	NA	NA	NA	15	68161273	8.99995e-07	449419	0.00114667	ukb-b-9981	TRUE	reported	igd	2	TRUE
Sensitivity / hurt feelings	rs3861451	C	T	C	T	-0.00558381	0.0377	0.36254	0.3417	FALSE	FALSE	FALSE	finn-b-I9_ICH	6	148320047	0.0371	NA	0.3098	Intracerebral haemmorrhage || id:finn-b-I9_ICH	Intracerebral haemmorrhage	Intracerebral haemmorrhage || ||	TRUE	igd	NA	NA	NA	NA	NA	NA	NA	6	148320047	1.89998e-07	449419	0.00107166	ukb-b-9981	TRUE	reported	igd	2	TRUE
Sensitivity / hurt feelings	rs3994135	G	A	G	A	0.00509756	0.0363	0.483809	0.4856	FALSE	FALSE	FALSE	finn-b-I9_ICH	12	10310267	0.0352	NA	0.3019	Intracerebral haemmorrhage || id:finn-b-I9_ICH	Intracerebral haemmorrhage	Intracerebral haemmorrhage || ||	TRUE	igd	NA	NA	NA	NA	NA	NA	NA	12	10310267	6.4e-07	449419	0.00102393	ukb-b-9981	TRUE	reported	igd	2	TRUE
Sensitivity / hurt feelings	rs4140799	A	G	A	G	-0.00524707	-0.0321	0.531819	0.543	FALSE	FALSE	FALSE	finn-b-I9_ICH	14	72170969	0.0353	NA	0.3623	Intracerebral haemmorrhage || id:finn-b-I9_ICH	Intracerebral haemmorrhage	Intracerebral haemmorrhage || ||	TRUE	igd	NA	NA	NA	NA	NA	NA	NA	14	72170969	3.50002e-07	449419	0.00103045	ukb-b-9981	TRUE	reported	igd	2	TRUE
Sensitivity / hurt feelings	rs4246675	T	C	T	C	-0.00485986	-0.0324	0.60598	0.6334	FALSE	FALSE	FALSE	finn-b-I9_ICH	3	56429943	0.0365	NA	0.3754	Intracerebral haemmorrhage || id:finn-b-I9_ICH	Intracerebral haemmorrhage	Intracerebral haemmorrhage || ||	TRUE	igd	NA	NA	NA	NA	NA	NA	NA	3	56429943	3.69999e-06	449419	0.00105067	ukb-b-9981	TRUE	reported	igd	2	TRUE
Sensitivity / hurt feelings	rs440712	A	G	A	G	0.0060946	0.0347	0.619548	0.6306	FALSE	FALSE	FALSE	finn-b-I9_ICH	14	69485347	0.0365	NA	0.3419	Intracerebral haemmorrhage || id:finn-b-I9_ICH	Intracerebral haemmorrhage	Intracerebral haemmorrhage || ||	TRUE	igd	NA	NA	NA	NA	NA	NA	NA	14	69485347	1.09999e-08	449419	0.00106601	ukb-b-9981	TRUE	reported	igd	2	TRUE
Sensitivity / hurt feelings	rs4418211	C	T	C	T	0.00562539	-0.0031	0.282413	0.2424	FALSE	FALSE	FALSE	finn-b-I9_ICH	6	129215569	0.0411	NA	0.9406	Intracerebral haemmorrhage || id:finn-b-I9_ICH	Intracerebral haemmorrhage	Intracerebral haemmorrhage || ||	TRUE	igd	NA	NA	NA	NA	NA	NA	NA	6	129215569	9.09997e-07	449419	0.00114583	ukb-b-9981	TRUE	reported	igd	2	TRUE
Sensitivity / hurt feelings	rs4505703	C	T	C	T	-0.00524108	0.076	0.505916	0.5561	FALSE	FALSE	FALSE	finn-b-I9_ICH	3	116973279	0.0354	NA	0.0318302	Intracerebral haemmorrhage || id:finn-b-I9_ICH	Intracerebral haemmorrhage	Intracerebral haemmorrhage || ||	TRUE	igd	NA	NA	NA	NA	NA	NA	NA	3	116973279	3.29997e-07	449419	0.00102647	ukb-b-9981	TRUE	reported	igd	2	TRUE
Sensitivity / hurt feelings	rs4550611	T	C	T	C	0.00637482	-0.0355	0.206987	0.1408	FALSE	FALSE	FALSE	finn-b-I9_ICH	2	142795932	0.0509	NA	0.4852	Intracerebral haemmorrhage || id:finn-b-I9_ICH	Intracerebral haemmorrhage	Intracerebral haemmorrhage || ||	TRUE	igd	NA	NA	NA	NA	NA	NA	NA	2	142795932	5.1e-07	449419	0.00126943	ukb-b-9981	TRUE	reported	igd	2	TRUE
Sensitivity / hurt feelings	rs4652676	A	G	A	G	0.00659649	-0.017	0.244568	0.2383	FALSE	FALSE	FALSE	finn-b-I9_ICH	1	181698693	0.0413	NA	0.6814	Intracerebral haemmorrhage || id:finn-b-I9_ICH	Intracerebral haemmorrhage	Intracerebral haemmorrhage || ||	TRUE	igd	NA	NA	NA	NA	NA	NA	NA	1	181698693	3.40001e-08	449419	0.00119537	ukb-b-9981	TRUE	reported	igd	2	TRUE
Sensitivity / hurt feelings	rs4653218	C	T	C	T	-0.0054881	-0.0367	0.57919	0.5838	FALSE	FALSE	FALSE	finn-b-I9_ICH	1	37197319	0.0356	NA	0.3033	Intracerebral haemmorrhage || id:finn-b-I9_ICH	Intracerebral haemmorrhage	Intracerebral haemmorrhage || ||	TRUE	igd	NA	NA	NA	NA	NA	NA	NA	1	37197319	1.29999e-07	449419	0.00103838	ukb-b-9981	TRUE	reported	igd	2	TRUE
Sensitivity / hurt feelings	rs4702	A	G	A	G	-0.00697329	0.0472	0.556357	0.5285	FALSE	FALSE	FALSE	finn-b-I9_ICH	15	91426560	0.0355	NA	0.1835	Intracerebral haemmorrhage || id:finn-b-I9_ICH	Intracerebral haemmorrhage	Intracerebral haemmorrhage || ||	TRUE	igd	NA	NA	NA	NA	NA	NA	NA	15	91426560	1.39991e-11	449419	0.00103193	ukb-b-9981	TRUE	reported	igd	2	TRUE
Sensitivity / hurt feelings	rs4731328	C	T	C	T	0.00819942	0.0009	0.485604	0.5354	FALSE	FALSE	FALSE	finn-b-I9_ICH	7	126379490	0.0353	NA	0.9799	Intracerebral haemmorrhage || id:finn-b-I9_ICH	Intracerebral haemmorrhage	Intracerebral haemmorrhage || ||	TRUE	igd	NA	NA	NA	NA	NA	NA	NA	7	126379490	1.50003e-15	449419	0.00102736	ukb-b-9981	TRUE	reported	igd	2	TRUE
Sensitivity / hurt feelings	rs4743365	T	C	T	C	0.00793978	-0.048	0.872809	0.7803	FALSE	FALSE	FALSE	finn-b-I9_ICH	9	102573773	0.0427	NA	0.261	Intracerebral haemmorrhage || id:finn-b-I9_ICH	Intracerebral haemmorrhage	Intracerebral haemmorrhage || ||	TRUE	igd	NA	NA	NA	NA	NA	NA	NA	9	102573773	2.59998e-07	449419	0.00154258	ukb-b-9981	TRUE	reported	igd	2	TRUE
Sensitivity / hurt feelings	rs4775678	T	C	T	C	0.00500514	-0.0326	0.414462	0.3504	FALSE	FALSE	FALSE	finn-b-I9_ICH	15	47586665	0.037	NA	0.3785	Intracerebral haemmorrhage || id:finn-b-I9_ICH	Intracerebral haemmorrhage	Intracerebral haemmorrhage || ||	TRUE	igd	NA	NA	NA	NA	NA	NA	NA	15	47586665	1.7e-06	449419	0.001046	ukb-b-9981	TRUE	reported	igd	2	TRUE
Sensitivity / hurt feelings	rs4791331	T	C	T	C	-0.00489128	0.04	0.463621	0.4516	FALSE	FALSE	FALSE	finn-b-I9_ICH	17	8932082	0.0354	NA	0.2586	Intracerebral haemmorrhage || id:finn-b-I9_ICH	Intracerebral haemmorrhage	Intracerebral haemmorrhage || ||	TRUE	igd	NA	NA	NA	NA	NA	NA	NA	17	8932082	2.1e-06	449419	0.00103164	ukb-b-9981	TRUE	reported	igd	2	TRUE
Sensitivity / hurt feelings	rs4868774	G	A	G	A	-0.00833013	0.1161	0.169673	0.1361	FALSE	FALSE	FALSE	finn-b-I9_ICH	5	166054544	0.0514	NA	0.0238002	Intracerebral haemmorrhage || id:finn-b-I9_ICH	Intracerebral haemmorrhage	Intracerebral haemmorrhage || ||	TRUE	igd	NA	NA	NA	NA	NA	NA	NA	5	166054544	1.6e-09	449419	0.00137984	ukb-b-9981	TRUE	reported	igd	2	TRUE
Sensitivity / hurt feelings	rs4868783	A	C	A	C	0.0077117	0.0553	0.112588	0.08794	FALSE	FALSE	FALSE	finn-b-I9_ICH	5	166294573	0.0624	NA	0.3751	Intracerebral haemmorrhage || id:finn-b-I9_ICH	Intracerebral haemmorrhage	Intracerebral haemmorrhage || ||	TRUE	igd	NA	NA	NA	NA	NA	NA	NA	5	166294573	2e-06	449419	0.00162135	ukb-b-9981	TRUE	reported	igd	2	TRUE
Sensitivity / hurt feelings	rs4924441	G	C	G	C	-0.00543183	0.0271	0.340699	0.2857	FALSE	TRUE	FALSE	finn-b-I9_ICH	15	35293895	0.0389	NA	0.4868	Intracerebral haemmorrhage || id:finn-b-I9_ICH	Intracerebral haemmorrhage	Intracerebral haemmorrhage || ||	TRUE	igd	NA	NA	NA	NA	NA	NA	NA	15	35293895	5.39995e-07	449419	0.00108412	ukb-b-9981	TRUE	reported	igd	2	TRUE
Sensitivity / hurt feelings	rs4936272	C	T	C	T	0.00757596	0.0013	0.514921	0.727	FALSE	FALSE	FALSE	finn-b-I9_ICH	11	113318907	0.0399	NA	0.9731	Intracerebral haemmorrhage || id:finn-b-I9_ICH	Intracerebral haemmorrhage	Intracerebral haemmorrhage || ||	TRUE	igd	NA	NA	NA	NA	NA	NA	NA	11	113318907	2.29985e-13	449419	0.00103395	ukb-b-9981	TRUE	reported	igd	2	TRUE
Sensitivity / hurt feelings	rs528199	C	A	C	A	0.00595138	0.007	0.53633	0.5095	FALSE	FALSE	FALSE	finn-b-I9_ICH	1	110046195	0.0353	NA	0.842	Intracerebral haemmorrhage || id:finn-b-I9_ICH	Intracerebral haemmorrhage	Intracerebral haemmorrhage || ||	TRUE	igd	NA	NA	NA	NA	NA	NA	NA	1	110046195	8.99995e-09	449419	0.00103543	ukb-b-9981	TRUE	reported	igd	2	TRUE
Sensitivity / hurt feelings	rs533741	C	T	C	T	0.00487103	0.0772	0.483806	0.4417	FALSE	FALSE	FALSE	finn-b-I9_ICH	6	93851328	0.0354	NA	0.02947	Intracerebral haemmorrhage || id:finn-b-I9_ICH	Intracerebral haemmorrhage	Intracerebral haemmorrhage || ||	TRUE	igd	NA	NA	NA	NA	NA	NA	NA	6	93851328	2.19999e-06	449419	0.00102836	ukb-b-9981	TRUE	reported	igd	2	TRUE
Sensitivity / hurt feelings	rs55917663	C	A	C	A	-0.00892475	0.0595	0.085136	0.05989	FALSE	FALSE	FALSE	finn-b-I9_ICH	7	132012375	0.0748	NA	0.4263	Intracerebral haemmorrhage || id:finn-b-I9_ICH	Intracerebral haemmorrhage	Intracerebral haemmorrhage || ||	TRUE	igd	TRUE	rs55917663	rs12112256	C	A	G	C	7	132011842	1.29999e-06	449419	0.00184323	ukb-b-9981	TRUE	reported	igd	2	TRUE
Sensitivity / hurt feelings	rs56178942	C	A	C	A	0.00562533	0.0107	0.413639	0.3775	FALSE	FALSE	FALSE	finn-b-I9_ICH	14	44015466	0.0361	NA	0.767901	Intracerebral haemmorrhage || id:finn-b-I9_ICH	Intracerebral haemmorrhage	Intracerebral haemmorrhage || ||	TRUE	igd	NA	NA	NA	NA	NA	NA	NA	14	44015466	7.19996e-08	449419	0.00104446	ukb-b-9981	TRUE	reported	igd	2	TRUE
Sensitivity / hurt feelings	rs56194509	G	T	G	T	0.014694	-0.0112	0.221672	0.08195	FALSE	FALSE	FALSE	finn-b-I9_ICH	17	43844559	0.0651	NA	0.864	Intracerebral haemmorrhage || id:finn-b-I9_ICH	Intracerebral haemmorrhage	Intracerebral haemmorrhage || ||	TRUE	igd	NA	NA	NA	NA	NA	NA	NA	17	43844559	1.80011e-32	449419	0.00123862	ukb-b-9981	TRUE	reported	igd	2	TRUE
Sensitivity / hurt feelings	rs57629420	G	A	G	A	-0.00638201	-0.0737	0.212636	0.221	FALSE	FALSE	FALSE	finn-b-I9_ICH	5	171950539	0.0425	NA	0.0827294	Intracerebral haemmorrhage || id:finn-b-I9_ICH	Intracerebral haemmorrhage	Intracerebral haemmorrhage || ||	TRUE	igd	NA	NA	NA	NA	NA	NA	NA	5	171950539	3.89996e-07	449419	0.00125758	ukb-b-9981	TRUE	reported	igd	2	TRUE
Sensitivity / hurt feelings	rs57982668	T	C	T	C	0.0066785	0.0394	0.148735	0.1772	FALSE	FALSE	FALSE	finn-b-I9_ICH	5	88968750	0.0461	NA	0.392	Intracerebral haemmorrhage || id:finn-b-I9_ICH	Intracerebral haemmorrhage	Intracerebral haemmorrhage || ||	TRUE	igd	NA	NA	NA	NA	NA	NA	NA	5	88968750	3.50002e-06	449419	0.00144002	ukb-b-9981	TRUE	reported	igd	2	TRUE
Sensitivity / hurt feelings	rs59331110	A	G	A	G	-0.00575582	-0.0178	0.538396	0.6436	FALSE	FALSE	FALSE	finn-b-I9_ICH	18	77493053	0.0368	NA	0.6291	Intracerebral haemmorrhage || id:finn-b-I9_ICH	Intracerebral haemmorrhage	Intracerebral haemmorrhage || ||	TRUE	igd	NA	NA	NA	NA	NA	NA	NA	18	77493053	2.30001e-08	449419	0.00103022	ukb-b-9981	TRUE	reported	igd	2	TRUE
Sensitivity / hurt feelings	rs61309698	T	C	T	C	-0.00531883	0.038	0.556116	0.5998	FALSE	FALSE	FALSE	finn-b-I9_ICH	16	82899561	0.036	NA	0.2909	Intracerebral haemmorrhage || id:finn-b-I9_ICH	Intracerebral haemmorrhage	Intracerebral haemmorrhage || ||	TRUE	igd	NA	NA	NA	NA	NA	NA	NA	16	82899561	2.80001e-07	449419	0.00103512	ukb-b-9981	TRUE	reported	igd	2	TRUE
Sensitivity / hurt feelings	rs61872821	G	A	G	A	0.0199379	0.1364	0.022545	0.03577	FALSE	FALSE	FALSE	finn-b-I9_ICH	10	114912965	0.0982	NA	0.165	Intracerebral haemmorrhage || id:finn-b-I9_ICH	Intracerebral haemmorrhage	Intracerebral haemmorrhage || ||	TRUE	igd	NA	NA	NA	NA	NA	NA	NA	10	114912965	1.40001e-07	449419	0.0037827	ukb-b-9981	TRUE	reported	igd	2	TRUE
Sensitivity / hurt feelings	rs61884797	T	C	T	C	0.00581691	-0.0595	0.226462	0.2774	FALSE	FALSE	FALSE	finn-b-I9_ICH	11	43527121	0.0391	NA	0.1279	Intracerebral haemmorrhage || id:finn-b-I9_ICH	Intracerebral haemmorrhage	Intracerebral haemmorrhage || ||	TRUE	igd	NA	NA	NA	NA	NA	NA	NA	11	43527121	2.19999e-06	449419	0.0012299	ukb-b-9981	TRUE	reported	igd	2	TRUE
Sensitivity / hurt feelings	rs61967754	A	G	A	G	-0.00822872	0.0468	0.100717	0.09936	FALSE	FALSE	FALSE	finn-b-I9_ICH	13	97310883	0.0584	NA	0.4228	Intracerebral haemmorrhage || id:finn-b-I9_ICH	Intracerebral haemmorrhage	Intracerebral haemmorrhage || ||	TRUE	igd	NA	NA	NA	NA	NA	NA	NA	13	97310883	1.40001e-06	449419	0.0017037	ukb-b-9981	TRUE	reported	igd	2	TRUE
Sensitivity / hurt feelings	rs61997669	A	T	A	T	0.00713709	0.0221	0.153514	0.1119	FALSE	TRUE	FALSE	finn-b-I9_ICH	14	57290870	0.0559	NA	0.6928	Intracerebral haemmorrhage || id:finn-b-I9_ICH	Intracerebral haemmorrhage	Intracerebral haemmorrhage || ||	TRUE	igd	NA	NA	NA	NA	NA	NA	NA	14	57290870	5.60003e-07	449419	0.00142644	ukb-b-9981	TRUE	reported	igd	2	TRUE
Sensitivity / hurt feelings	rs62140827	C	T	C	T	-0.00655973	-0.0425	0.172446	0.1638	FALSE	FALSE	FALSE	finn-b-I9_ICH	2	58737818	0.0476	NA	0.3724	Intracerebral haemmorrhage || id:finn-b-I9_ICH	Intracerebral haemmorrhage	Intracerebral haemmorrhage || ||	TRUE	igd	NA	NA	NA	NA	NA	NA	NA	2	58737818	1.40001e-06	449419	0.00135867	ukb-b-9981	TRUE	reported	igd	2	TRUE
Sensitivity / hurt feelings	rs62442214	G	A	G	A	-0.00897997	0.0607	0.136005	0.1361	FALSE	FALSE	FALSE	finn-b-I9_ICH	7	39147473	0.0511	NA	0.2349	Intracerebral haemmorrhage || id:finn-b-I9_ICH	Intracerebral haemmorrhage	Intracerebral haemmorrhage || ||	TRUE	igd	NA	NA	NA	NA	NA	NA	NA	7	39147473	2.39999e-09	449419	0.00150379	ukb-b-9981	TRUE	reported	igd	2	TRUE
Sensitivity / hurt feelings	rs6442649	G	C	G	C	0.00575003	0.0463	0.375304	0.3626	FALSE	TRUE	FALSE	finn-b-I9_ICH	3	16872854	0.0366	NA	0.2064	Intracerebral haemmorrhage || id:finn-b-I9_ICH	Intracerebral haemmorrhage	Intracerebral haemmorrhage || ||	TRUE	igd	NA	NA	NA	NA	NA	NA	NA	3	16872854	6.49995e-08	449419	0.00106408	ukb-b-9981	TRUE	reported	igd	2	TRUE
Sensitivity / hurt feelings	rs6455584	C	T	C	T	0.0052679	-0.0219	0.585964	0.5737	FALSE	FALSE	FALSE	finn-b-I9_ICH	6	158911693	0.0354	NA	0.5357	Intracerebral haemmorrhage || id:finn-b-I9_ICH	Intracerebral haemmorrhage	Intracerebral haemmorrhage || ||	TRUE	igd	NA	NA	NA	NA	NA	NA	NA	6	158911693	4.60002e-07	449419	0.0010447	ukb-b-9981	TRUE	reported	igd	2	TRUE
Sensitivity / hurt feelings	rs6578129	A	G	A	G	0.00573063	-0.0443	0.605517	0.5256	FALSE	FALSE	FALSE	finn-b-I9_ICH	8	141656890	0.0353	NA	0.209	Intracerebral haemmorrhage || id:finn-b-I9_ICH	Intracerebral haemmorrhage	Intracerebral haemmorrhage || ||	TRUE	igd	NA	NA	NA	NA	NA	NA	NA	8	141656890	5.39995e-08	449419	0.00105371	ukb-b-9981	TRUE	reported	igd	2	TRUE
Sensitivity / hurt feelings	rs66948099	T	C	T	C	0.00574616	0.0303	0.268671	0.2776	FALSE	FALSE	FALSE	finn-b-I9_ICH	6	141792380	0.0394	NA	0.4413	Intracerebral haemmorrhage || id:finn-b-I9_ICH	Intracerebral haemmorrhage	Intracerebral haemmorrhage || ||	TRUE	igd	NA	NA	NA	NA	NA	NA	NA	6	141792380	8.9e-07	449419	0.00116923	ukb-b-9981	TRUE	reported	igd	2	TRUE
Sensitivity / hurt feelings	rs6851494	C	G	C	G	-0.00688225	0.0003	0.80993	0.7996	FALSE	TRUE	FALSE	finn-b-I9_ICH	4	119054788	0.0438	NA	0.9944	Intracerebral haemmorrhage || id:finn-b-I9_ICH	Intracerebral haemmorrhage	Intracerebral haemmorrhage || ||	TRUE	igd	NA	NA	NA	NA	NA	NA	NA	4	119054788	1.29999e-07	449419	0.00130492	ukb-b-9981	TRUE	reported	igd	2	TRUE
Sensitivity / hurt feelings	rs687790	T	C	T	C	0.00549617	0.037	0.682923	0.6552	FALSE	FALSE	FALSE	finn-b-I9_ICH	1	88786051	0.0369	NA	0.3161	Intracerebral haemmorrhage || id:finn-b-I9_ICH	Intracerebral haemmorrhage	Intracerebral haemmorrhage || ||	TRUE	igd	NA	NA	NA	NA	NA	NA	NA	1	88786051	6.1e-07	449419	0.00110205	ukb-b-9981	TRUE	reported	igd	2	TRUE
Sensitivity / hurt feelings	rs6884683	C	T	C	T	-0.00522271	-0.028	0.558974	0.5751	FALSE	FALSE	FALSE	finn-b-I9_ICH	5	20197401	0.0354	NA	0.4291	Intracerebral haemmorrhage || id:finn-b-I9_ICH	Intracerebral haemmorrhage	Intracerebral haemmorrhage || ||	TRUE	igd	NA	NA	NA	NA	NA	NA	NA	5	20197401	4.20001e-07	449419	0.00103245	ukb-b-9981	TRUE	reported	igd	2	TRUE
Sensitivity / hurt feelings	rs6925748	G	A	G	A	0.00511667	-0.0216	0.426231	0.4097	FALSE	FALSE	FALSE	finn-b-I9_ICH	6	50930041	0.0359	NA	0.546799	Intracerebral haemmorrhage || id:finn-b-I9_ICH	Intracerebral haemmorrhage	Intracerebral haemmorrhage || ||	TRUE	igd	NA	NA	NA	NA	NA	NA	NA	6	50930041	8.30004e-07	449419	0.00103815	ukb-b-9981	TRUE	reported	igd	2	TRUE
Sensitivity / hurt feelings	rs7003445	C	T	C	T	-0.00512864	-0.0862	0.409239	0.4039	FALSE	FALSE	FALSE	finn-b-I9_ICH	8	106725186	0.0359	NA	0.01639	Intracerebral haemmorrhage || id:finn-b-I9_ICH	Intracerebral haemmorrhage	Intracerebral haemmorrhage || ||	TRUE	igd	NA	NA	NA	NA	NA	NA	NA	8	106725186	9.49992e-07	449419	0.00104623	ukb-b-9981	TRUE	reported	igd	2	TRUE
Sensitivity / hurt feelings	rs701008	C	T	C	T	-0.00569529	-0.0131	0.373437	0.4128	FALSE	FALSE	FALSE	finn-b-I9_ICH	12	58117645	0.0359	NA	0.714801	Intracerebral haemmorrhage || id:finn-b-I9_ICH	Intracerebral haemmorrhage	Intracerebral haemmorrhage || ||	TRUE	igd	NA	NA	NA	NA	NA	NA	NA	12	58117645	7.69999e-08	449419	0.00105968	ukb-b-9981	TRUE	reported	igd	2	TRUE
Sensitivity / hurt feelings	rs7015350	G	A	G	A	-0.0060403	0.0552	0.567752	0.5689	FALSE	FALSE	FALSE	finn-b-I9_ICH	8	137025414	0.0355	NA	0.1197	Intracerebral haemmorrhage || id:finn-b-I9_ICH	Intracerebral haemmorrhage	Intracerebral haemmorrhage || ||	TRUE	igd	TRUE	rs7015350	rs4909537	A	G	C	T	8	137025090	7.29995e-09	449419	0.00104452	ukb-b-9981	TRUE	reported	igd	2	TRUE
Sensitivity / hurt feelings	rs7221126	A	C	A	C	-0.00597013	-0.038	0.274716	0.2508	FALSE	FALSE	FALSE	finn-b-I9_ICH	17	47042162	0.0406	NA	0.3503	Intracerebral haemmorrhage || id:finn-b-I9_ICH	Intracerebral haemmorrhage	Intracerebral haemmorrhage || ||	TRUE	igd	NA	NA	NA	NA	NA	NA	NA	17	47042162	2.39999e-07	449419	0.0011551	ukb-b-9981	TRUE	reported	igd	2	TRUE
Sensitivity / hurt feelings	rs727582	G	A	G	A	0.00608205	0.0292	0.340424	0.4392	FALSE	FALSE	FALSE	finn-b-I9_ICH	8	116650468	0.0355	NA	0.4099	Intracerebral haemmorrhage || id:finn-b-I9_ICH	Intracerebral haemmorrhage	Intracerebral haemmorrhage || ||	TRUE	igd	NA	NA	NA	NA	NA	NA	NA	8	116650468	2.1e-08	449419	0.0010852	ukb-b-9981	TRUE	reported	igd	2	TRUE
Sensitivity / hurt feelings	rs73480560	T	C	T	C	0.00664784	-0.0096	0.262533	0.2892	FALSE	FALSE	FALSE	finn-b-I9_ICH	11	57401400	0.039	NA	0.805	Intracerebral haemmorrhage || id:finn-b-I9_ICH	Intracerebral haemmorrhage	Intracerebral haemmorrhage || ||	TRUE	igd	NA	NA	NA	NA	NA	NA	NA	11	57401400	1.5e-08	449419	0.00117536	ukb-b-9981	TRUE	reported	igd	2	TRUE
Sensitivity / hurt feelings	rs74531549	C	A	C	A	0.00724929	-0.0074	0.138229	0.0859	FALSE	FALSE	FALSE	finn-b-I9_ICH	12	133362170	0.0634	NA	0.9065	Intracerebral haemmorrhage || id:finn-b-I9_ICH	Intracerebral haemmorrhage	Intracerebral haemmorrhage || ||	TRUE	igd	NA	NA	NA	NA	NA	NA	NA	12	133362170	1.09999e-06	449419	0.00148913	ukb-b-9981	TRUE	reported	igd	2	TRUE
Sensitivity / hurt feelings	rs74539229	C	T	C	T	-0.00804779	0.0119	0.133061	0.09865	FALSE	FALSE	FALSE	finn-b-I9_ICH	8	110606431	0.0594	NA	0.8419	Intracerebral haemmorrhage || id:finn-b-I9_ICH	Intracerebral haemmorrhage	Intracerebral haemmorrhage || ||	TRUE	igd	NA	NA	NA	NA	NA	NA	NA	8	110606431	1.09999e-07	449419	0.00151397	ukb-b-9981	TRUE	reported	igd	2	TRUE
Sensitivity / hurt feelings	rs74820408	G	A	G	A	-0.00679177	0.1206	0.145797	0.1407	FALSE	FALSE	FALSE	finn-b-I9_ICH	12	40180662	0.0506	NA	0.01721	Intracerebral haemmorrhage || id:finn-b-I9_ICH	Intracerebral haemmorrhage	Intracerebral haemmorrhage || ||	TRUE	igd	NA	NA	NA	NA	NA	NA	NA	12	40180662	4.20001e-06	449419	0.0014765	ukb-b-9981	TRUE	reported	igd	2	TRUE
Sensitivity / hurt feelings	rs7589652	T	C	T	C	-0.00557359	-0.0185	0.38168	0.3024	FALSE	FALSE	FALSE	finn-b-I9_ICH	2	107475496	0.0385	NA	0.6311	Intracerebral haemmorrhage || id:finn-b-I9_ICH	Intracerebral haemmorrhage	Intracerebral haemmorrhage || ||	TRUE	igd	NA	NA	NA	NA	NA	NA	NA	2	107475496	1.29999e-07	449419	0.00105694	ukb-b-9981	TRUE	reported	igd	2	TRUE
Sensitivity / hurt feelings	rs75938739	A	G	A	G	0.0178395	0.071	0.020648	0.02351	FALSE	FALSE	FALSE	finn-b-I9_ICH	15	51687250	0.1178	NA	0.546799	Intracerebral haemmorrhage || id:finn-b-I9_ICH	Intracerebral haemmorrhage	Intracerebral haemmorrhage || ||	TRUE	igd	NA	NA	NA	NA	NA	NA	NA	15	51687250	8.79995e-07	449419	0.0036291	ukb-b-9981	TRUE	reported	igd	2	TRUE
Sensitivity / hurt feelings	rs75943024	A	G	A	G	-0.0126012	-0.0173	0.041249	0.01723	FALSE	FALSE	FALSE	finn-b-I9_ICH	3	155873990	0.1397	NA	0.9012	Intracerebral haemmorrhage || id:finn-b-I9_ICH	Intracerebral haemmorrhage	Intracerebral haemmorrhage || ||	TRUE	igd	NA	NA	NA	NA	NA	NA	NA	3	155873990	1.40001e-06	449419	0.00261105	ukb-b-9981	TRUE	reported	igd	2	TRUE
Sensitivity / hurt feelings	rs7610054	G	A	G	A	-0.00634091	0.026	0.226994	0.2263	FALSE	FALSE	FALSE	finn-b-I9_ICH	3	113935873	0.0421	NA	0.5366	Intracerebral haemmorrhage || id:finn-b-I9_ICH	Intracerebral haemmorrhage	Intracerebral haemmorrhage || ||	TRUE	igd	NA	NA	NA	NA	NA	NA	NA	3	113935873	2.90001e-07	449419	0.00123544	ukb-b-9981	TRUE	reported	igd	2	TRUE
Sensitivity / hurt feelings	rs76216421	A	C	A	C	-0.0136568	-0.1462	0.031657	0.0183	FALSE	FALSE	FALSE	finn-b-I9_ICH	11	107449853	0.1319	NA	0.2674	Intracerebral haemmorrhage || id:finn-b-I9_ICH	Intracerebral haemmorrhage	Intracerebral haemmorrhage || ||	TRUE	igd	NA	NA	NA	NA	NA	NA	NA	11	107449853	2.99999e-06	449419	0.00292482	ukb-b-9981	TRUE	reported	igd	2	TRUE
Sensitivity / hurt feelings	rs7626871	G	A	G	A	0.00891886	-0.0673	0.089899	0.06808	FALSE	FALSE	FALSE	finn-b-I9_ICH	3	141160882	0.0698	NA	0.335	Intracerebral haemmorrhage || id:finn-b-I9_ICH	Intracerebral haemmorrhage	Intracerebral haemmorrhage || ||	TRUE	igd	NA	NA	NA	NA	NA	NA	NA	3	141160882	6.4e-07	449419	0.00179117	ukb-b-9981	TRUE	reported	igd	2	TRUE
Sensitivity / hurt feelings	rs7638516	C	A	C	A	-0.00635738	0.0078	0.376456	0.4512	FALSE	FALSE	FALSE	finn-b-I9_ICH	3	81826249	0.0354	NA	0.826	Intracerebral haemmorrhage || id:finn-b-I9_ICH	Intracerebral haemmorrhage	Intracerebral haemmorrhage || ||	TRUE	igd	NA	NA	NA	NA	NA	NA	NA	3	81826249	1.89998e-09	449419	0.00105874	ukb-b-9981	TRUE	reported	igd	2	TRUE
Sensitivity / hurt feelings	rs77024282	A	G	A	G	0.0182292	-0.0128	0.018471	0.0189	FALSE	FALSE	FALSE	finn-b-I9_ICH	2	67270649	0.1323	NA	0.9231	Intracerebral haemmorrhage || id:finn-b-I9_ICH	Intracerebral haemmorrhage	Intracerebral haemmorrhage || ||	TRUE	igd	NA	NA	NA	NA	NA	NA	NA	2	67270649	1.7e-06	449419	0.00380497	ukb-b-9981	TRUE	reported	igd	2	TRUE
Sensitivity / hurt feelings	rs7814499	G	A	G	A	0.00728536	-0.0954	0.520957	0.4292	FALSE	FALSE	FALSE	finn-b-I9_ICH	8	11040647	0.0606	NA	0.1154	Intracerebral haemmorrhage || id:finn-b-I9_ICH	Intracerebral haemmorrhage	Intracerebral haemmorrhage || ||	TRUE	igd	NA	NA	NA	NA	NA	NA	NA	8	11040647	1.39991e-12	449419	0.00102822	ukb-b-9981	TRUE	reported	igd	2	TRUE
Sensitivity / hurt feelings	rs7937277	G	C	G	C	-0.00849132	0.0974	0.137715	0.2203	FALSE	TRUE	FALSE	finn-b-I9_ICH	11	78114977	0.0425	NA	0.0220298	Intracerebral haemmorrhage || id:finn-b-I9_ICH	Intracerebral haemmorrhage	Intracerebral haemmorrhage || ||	TRUE	igd	NA	NA	NA	NA	NA	NA	NA	11	78114977	1.2e-08	449419	0.00149158	ukb-b-9981	TRUE	reported	igd	2	TRUE
Sensitivity / hurt feelings	rs7974375	T	G	T	G	0.00783995	-0.028	0.161315	0.186	FALSE	FALSE	FALSE	finn-b-I9_ICH	12	118585698	0.0453	NA	0.5364	Intracerebral haemmorrhage || id:finn-b-I9_ICH	Intracerebral haemmorrhage	Intracerebral haemmorrhage || ||	TRUE	igd	NA	NA	NA	NA	NA	NA	NA	12	118585698	2.30001e-08	449419	0.00140396	ukb-b-9981	TRUE	reported	igd	2	TRUE
Sensitivity / hurt feelings	rs79780963	T	C	T	C	-0.00897229	-0.0325	0.07741	0.08319	FALSE	FALSE	FALSE	finn-b-I9_ICH	10	104952499	0.064	NA	0.611499	Intracerebral haemmorrhage || id:finn-b-I9_ICH	Intracerebral haemmorrhage	Intracerebral haemmorrhage || ||	TRUE	igd	NA	NA	NA	NA	NA	NA	NA	10	104952499	2.90001e-06	449419	0.00191724	ukb-b-9981	TRUE	reported	igd	2	TRUE
Sensitivity / hurt feelings	rs9320507	A	G	A	G	-0.00719423	0.0036	0.194531	0.2458	FALSE	FALSE	FALSE	finn-b-I9_ICH	6	97750169	0.0408	NA	0.9288	Intracerebral haemmorrhage || id:finn-b-I9_ICH	Intracerebral haemmorrhage	Intracerebral haemmorrhage || ||	TRUE	igd	TRUE	rs9320507	rs4839905	A	G	T	C	6	97749935	3.09999e-08	449419	0.00130015	ukb-b-9981	TRUE	reported	igd	2	TRUE
Sensitivity / hurt feelings	rs9322225	C	G	C	G	0.00559271	0.0283	0.388908	0.416	FALSE	TRUE	FALSE	finn-b-I9_ICH	6	150184882	0.0356	NA	0.4257	Intracerebral haemmorrhage || id:finn-b-I9_ICH	Intracerebral haemmorrhage	Intracerebral haemmorrhage || ||	TRUE	igd	NA	NA	NA	NA	NA	NA	NA	6	150184882	1.09999e-07	449419	0.00105362	ukb-b-9981	TRUE	reported	igd	2	TRUE
Sensitivity / hurt feelings	rs9541683	C	G	C	G	0.00533942	-0.0054	0.704834	0.7018	FALSE	TRUE	FALSE	finn-b-I9_ICH	13	69568436	0.0385	NA	0.8893	Intracerebral haemmorrhage || id:finn-b-I9_ICH	Intracerebral haemmorrhage	Intracerebral haemmorrhage || ||	TRUE	igd	NA	NA	NA	NA	NA	NA	NA	13	69568436	2.19999e-06	449419	0.00112832	ukb-b-9981	TRUE	reported	igd	2	TRUE
Sensitivity / hurt feelings	rs958538	C	T	C	T	-0.0072735	-0.008	0.246926	0.2033	FALSE	FALSE	FALSE	finn-b-I9_ICH	9	11522951	0.0438	NA	0.8558	Intracerebral haemmorrhage || id:finn-b-I9_ICH	Intracerebral haemmorrhage	Intracerebral haemmorrhage || ||	TRUE	igd	NA	NA	NA	NA	NA	NA	NA	9	11522951	1e-09	449419	0.0011917	ukb-b-9981	TRUE	reported	igd	2	TRUE
Sensitivity / hurt feelings	rs9650482	T	C	T	C	0.00584664	0.0763	0.210667	0.2328	FALSE	FALSE	FALSE	finn-b-I9_ICH	8	4006192	0.0416	NA	0.0668606	Intracerebral haemmorrhage || id:finn-b-I9_ICH	Intracerebral haemmorrhage	Intracerebral haemmorrhage || ||	TRUE	igd	NA	NA	NA	NA	NA	NA	NA	8	4006192	3.59998e-06	449419	0.00126213	ukb-b-9981	TRUE	reported	igd	2	TRUE
Sensitivity / hurt feelings	rs9662741	G	A	G	A	0.00482071	-0.0844	0.512471	0.4778	FALSE	FALSE	FALSE	finn-b-I9_ICH	1	18395025	0.0353	NA	0.0166702	Intracerebral haemmorrhage || id:finn-b-I9_ICH	Intracerebral haemmorrhage	Intracerebral haemmorrhage || ||	TRUE	igd	NA	NA	NA	NA	NA	NA	NA	1	18395025	2.5e-06	449419	0.00102464	ukb-b-9981	TRUE	reported	igd	2	TRUE
Sensitivity / hurt feelings	rs9792663	T	C	T	C	-0.00486927	-0.0178	0.400627	0.491	FALSE	FALSE	FALSE	finn-b-I9_ICH	9	3047991	0.0351	NA	0.612099	Intracerebral haemmorrhage || id:finn-b-I9_ICH	Intracerebral haemmorrhage	Intracerebral haemmorrhage || ||	TRUE	igd	NA	NA	NA	NA	NA	NA	NA	9	3047991	3.40001e-06	449419	0.00104824	ukb-b-9981	TRUE	reported	igd	2	TRUE
Sensitivity / hurt feelings	rs9933638	G	A	G	A	-0.00526107	0.0678	0.467416	0.4216	FALSE	FALSE	FALSE	finn-b-I9_ICH	16	52539597	0.0355	NA	0.0564703	Intracerebral haemmorrhage || id:finn-b-I9_ICH	Intracerebral haemmorrhage	Intracerebral haemmorrhage || ||	TRUE	igd	NA	NA	NA	NA	NA	NA	NA	16	52539597	3.2e-07	449419	0.00102896	ukb-b-9981	TRUE	reported	igd	2	TRUE
Sensitivity / hurt feelings	rs995986	T	C	T	C	0.00482201	-0.0217	0.439871	0.4158	FALSE	FALSE	FALSE	finn-b-I9_ICH	11	41072856	0.0357	NA	0.5433	Intracerebral haemmorrhage || id:finn-b-I9_ICH	Intracerebral haemmorrhage	Intracerebral haemmorrhage || ||	TRUE	igd	NA	NA	NA	NA	NA	NA	NA	11	41072856	2.99999e-06	449419	0.0010317	ukb-b-9981	TRUE	reported	igd	2	TRUE
Sensitivity / hurt feelings	rs9967983	T	A	T	A	-0.00513047	-0.054	0.416308	0.4187	FALSE	TRUE	FALSE	finn-b-I9_ICH	21	33037482	0.0357	NA	0.1302	Intracerebral haemmorrhage || id:finn-b-I9_ICH	Intracerebral haemmorrhage	Intracerebral haemmorrhage || ||	TRUE	igd	NA	NA	NA	NA	NA	NA	NA	21	33037482	8.40001e-07	449419	0.00104172	ukb-b-9981	TRUE	reported	igd	2	TRUE
Tense / 'highly strung'	rs1020927	C	G	C	G	0.00431097	0.0406	0.248211	0.2423	FALSE	TRUE	FALSE	finn-b-I9_ICH	15	66551258	0.0411	NA	0.323	Intracerebral haemmorrhage || id:finn-b-I9_ICH	Intracerebral haemmorrhage	Intracerebral haemmorrhage || ||	TRUE	igd	NA	NA	NA	NA	NA	NA	NA	15	66551258	3.2e-06	447961	0.000925509	ukb-b-10093	TRUE	reported	igd	2	TRUE
Tense / 'highly strung'	rs10422861	T	C	T	C	-0.00402314	-0.0107	0.665342	0.6572	FALSE	FALSE	FALSE	finn-b-I9_ICH	19	33894846	0.037	NA	0.772899	Intracerebral haemmorrhage || id:finn-b-I9_ICH	Intracerebral haemmorrhage	Intracerebral haemmorrhage || ||	TRUE	igd	NA	NA	NA	NA	NA	NA	NA	19	33894846	2.1e-06	447961	0.000848516	ukb-b-10093	TRUE	reported	igd	2	TRUE
Tense / 'highly strung'	rs1045430	G	T	G	T	0.00485521	0.0174	0.519315	0.4955	FALSE	FALSE	FALSE	finn-b-I9_ICH	14	75130235	0.0351	NA	0.619901	Intracerebral haemmorrhage || id:finn-b-I9_ICH	Intracerebral haemmorrhage	Intracerebral haemmorrhage || ||	TRUE	igd	NA	NA	NA	NA	NA	NA	NA	14	75130235	1.2e-09	447961	0.000799066	ukb-b-10093	TRUE	reported	igd	2	TRUE
Tense / 'highly strung'	rs10756594	T	G	T	G	-0.0039877	-0.0081	0.49005	0.4454	FALSE	FALSE	FALSE	finn-b-I9_ICH	9	14653367	0.0353	NA	0.8189	Intracerebral haemmorrhage || id:finn-b-I9_ICH	Intracerebral haemmorrhage	Intracerebral haemmorrhage || ||	TRUE	igd	NA	NA	NA	NA	NA	NA	NA	9	14653367	6.69993e-07	447961	0.000802384	ukb-b-10093	TRUE	reported	igd	2	TRUE
Tense / 'highly strung'	rs10769263	C	A	C	A	0.00399665	0.0179	0.38992	0.299	FALSE	FALSE	FALSE	finn-b-I9_ICH	11	47417183	0.0389	NA	0.6457	Intracerebral haemmorrhage || id:finn-b-I9_ICH	Intracerebral haemmorrhage	Intracerebral haemmorrhage || ||	TRUE	igd	NA	NA	NA	NA	NA	NA	NA	11	47417183	1.09999e-06	447961	0.000821046	ukb-b-10093	TRUE	reported	igd	2	TRUE
Tense / 'highly strung'	rs10803421	C	T	C	T	-0.00440249	0.0095	0.460427	0.3891	FALSE	FALSE	FALSE	finn-b-I9_ICH	1	13956484	0.0362	NA	0.793299	Intracerebral haemmorrhage || id:finn-b-I9_ICH	Intracerebral haemmorrhage	Intracerebral haemmorrhage || ||	TRUE	igd	NA	NA	NA	NA	NA	NA	NA	1	13956484	7.59994e-08	447961	0.000818826	ukb-b-10093	TRUE	reported	igd	2	TRUE
Tense / 'highly strung'	rs10917025	A	G	A	G	0.00469549	-0.0015	0.216614	0.192	FALSE	FALSE	FALSE	finn-b-I9_ICH	1	21952590	0.0448	NA	0.9737	Intracerebral haemmorrhage || id:finn-b-I9_ICH	Intracerebral haemmorrhage	Intracerebral haemmorrhage || ||	TRUE	igd	NA	NA	NA	NA	NA	NA	NA	1	21952590	1.29999e-06	447961	0.000970171	ukb-b-10093	TRUE	reported	igd	2	TRUE
Tense / 'highly strung'	rs11062170	C	G	C	G	0.00437074	0.0337	0.334251	0.3108	FALSE	TRUE	FALSE	finn-b-I9_ICH	12	2348844	0.0379	NA	0.3739	Intracerebral haemmorrhage || id:finn-b-I9_ICH	Intracerebral haemmorrhage	Intracerebral haemmorrhage || ||	TRUE	igd	NA	NA	NA	NA	NA	NA	NA	12	2348844	2.5e-07	447961	0.000847606	ukb-b-10093	TRUE	reported	igd	2	TRUE
Tense / 'highly strung'	rs111275817	C	T	C	T	0.0114575	-0.1427	0.0352	0.02716	FALSE	FALSE	FALSE	finn-b-I9_ICH	4	29376920	0.1073	NA	0.1835	Intracerebral haemmorrhage || id:finn-b-I9_ICH	Intracerebral haemmorrhage	Intracerebral haemmorrhage || ||	TRUE	igd	NA	NA	NA	NA	NA	NA	NA	4	29376920	1.5e-07	447961	0.00218329	ukb-b-10093	TRUE	reported	igd	2	TRUE
Tense / 'highly strung'	rs11252681	A	G	A	G	0.0094275	0.0837	0.045527	0.05756	FALSE	FALSE	FALSE	finn-b-I9_ICH	10	530775	0.0766	NA	0.2746	Intracerebral haemmorrhage || id:finn-b-I9_ICH	Intracerebral haemmorrhage	Intracerebral haemmorrhage || ||	TRUE	igd	NA	NA	NA	NA	NA	NA	NA	10	530775	8.79995e-07	447961	0.0019178	ukb-b-10093	TRUE	reported	igd	2	TRUE
Tense / 'highly strung'	rs112591851	T	C	T	C	-0.0116992	0.1163	0.033055	0.04291	FALSE	FALSE	FALSE	finn-b-I9_ICH	19	52252384	0.0874	NA	0.1833	Intracerebral haemmorrhage || id:finn-b-I9_ICH	Intracerebral haemmorrhage	Intracerebral haemmorrhage || ||	TRUE	igd	NA	NA	NA	NA	NA	NA	NA	19	52252384	2.69998e-07	447961	0.00227322	ukb-b-10093	TRUE	reported	igd	2	TRUE
Tense / 'highly strung'	rs1126809	A	G	A	G	0.00401325	-0.0229	0.303985	0.1784	FALSE	FALSE	FALSE	finn-b-I9_ICH	11	89017961	0.0461	NA	0.6188	Intracerebral haemmorrhage || id:finn-b-I9_ICH	Intracerebral haemmorrhage	Intracerebral haemmorrhage || ||	TRUE	igd	NA	NA	NA	NA	NA	NA	NA	11	89017961	3.89996e-06	447961	0.000869128	ukb-b-10093	TRUE	reported	igd	2	TRUE
Tense / 'highly strung'	rs11509880	A	G	A	G	0.00547804	0.0457	0.329734	0.316	FALSE	FALSE	FALSE	finn-b-I9_ICH	7	12261911	0.0378	NA	0.2272	Intracerebral haemmorrhage || id:finn-b-I9_ICH	Intracerebral haemmorrhage	Intracerebral haemmorrhage || ||	TRUE	igd	NA	NA	NA	NA	NA	NA	NA	7	12261911	1.09999e-10	447961	0.000849114	ukb-b-10093	TRUE	reported	igd	2	TRUE
Tense / 'highly strung'	rs1155301	T	C	T	C	0.00550747	-0.0132	0.158065	0.1735	FALSE	FALSE	FALSE	finn-b-I9_ICH	2	195913337	0.0462	NA	0.7759	Intracerebral haemmorrhage || id:finn-b-I9_ICH	Intracerebral haemmorrhage	Intracerebral haemmorrhage || ||	TRUE	igd	NA	NA	NA	NA	NA	NA	NA	2	195913337	5.1e-07	447961	0.00109633	ukb-b-10093	TRUE	reported	igd	2	TRUE
Tense / 'highly strung'	rs116464279	A	T	A	T	0.0142814	0.1092	0.024727	0.01246	FALSE	TRUE	FALSE	finn-b-I9_ICH	3	36404892	0.1642	NA	0.506001	Intracerebral haemmorrhage || id:finn-b-I9_ICH	Intracerebral haemmorrhage	Intracerebral haemmorrhage || ||	TRUE	igd	NA	NA	NA	NA	NA	NA	NA	3	36404892	6.19998e-08	447961	0.00263901	ukb-b-10093	TRUE	reported	igd	2	TRUE
Tense / 'highly strung'	rs11650309	C	G	C	G	-0.00554981	-0.0594	0.266084	0.1781	FALSE	TRUE	FALSE	finn-b-I9_ICH	17	8129538	0.046	NA	0.1965	Intracerebral haemmorrhage || id:finn-b-I9_ICH	Intracerebral haemmorrhage	Intracerebral haemmorrhage || ||	TRUE	igd	NA	NA	NA	NA	NA	NA	NA	17	8129538	9.49992e-10	447961	0.000907106	ukb-b-10093	TRUE	reported	igd	2	TRUE
Tense / 'highly strung'	rs11665052	G	A	G	A	-0.00443363	-0.0512	0.264494	0.1949	FALSE	FALSE	FALSE	finn-b-I9_ICH	18	57908675	0.0443	NA	0.2481	Intracerebral haemmorrhage || id:finn-b-I9_ICH	Intracerebral haemmorrhage	Intracerebral haemmorrhage || ||	TRUE	igd	NA	NA	NA	NA	NA	NA	NA	18	57908675	1.09999e-06	447961	0.000909381	ukb-b-10093	TRUE	reported	igd	2	TRUE
Tense / 'highly strung'	rs1166698	A	G	A	G	0.00449532	-0.019	0.21235	0.1703	FALSE	FALSE	FALSE	finn-b-I9_ICH	1	78392446	0.0469	NA	0.6851	Intracerebral haemmorrhage || id:finn-b-I9_ICH	Intracerebral haemmorrhage	Intracerebral haemmorrhage || ||	TRUE	igd	NA	NA	NA	NA	NA	NA	NA	1	78392446	4.30002e-06	447961	0.000977904	ukb-b-10093	TRUE	reported	igd	2	TRUE
Tense / 'highly strung'	rs116980752	C	G	C	G	0.0164974	-0.0526	0.015469	0.008639	FALSE	TRUE	FALSE	finn-b-I9_ICH	12	121056263	0.1973	NA	0.7897	Intracerebral haemmorrhage || id:finn-b-I9_ICH	Intracerebral haemmorrhage	Intracerebral haemmorrhage || ||	TRUE	igd	NA	NA	NA	NA	NA	NA	NA	12	121056263	1e-06	447961	0.00337301	ukb-b-10093	TRUE	reported	igd	2	TRUE
Tense / 'highly strung'	rs11709880	G	A	G	A	-0.00391624	0.0286	0.67599	0.7487	FALSE	FALSE	FALSE	finn-b-I9_ICH	3	178217907	0.0406	NA	0.481	Intracerebral haemmorrhage || id:finn-b-I9_ICH	Intracerebral haemmorrhage	Intracerebral haemmorrhage || ||	TRUE	igd	NA	NA	NA	NA	NA	NA	NA	3	178217907	4.70002e-06	447961	0.000855869	ukb-b-10093	TRUE	reported	igd	2	TRUE
Tense / 'highly strung'	rs11720684	A	G	A	G	-0.00411426	-0.0285	0.350389	0.2733	FALSE	FALSE	FALSE	finn-b-I9_ICH	3	134694436	0.0397	NA	0.4725	Intracerebral haemmorrhage || id:finn-b-I9_ICH	Intracerebral haemmorrhage	Intracerebral haemmorrhage || ||	TRUE	igd	NA	NA	NA	NA	NA	NA	NA	3	134694436	1.09999e-06	447961	0.000844736	ukb-b-10093	TRUE	reported	igd	2	TRUE
Tense / 'highly strung'	rs11721709	G	C	G	C	0.00540344	-0.0574	0.242994	0.2652	FALSE	TRUE	FALSE	finn-b-I9_ICH	4	65775277	0.0397	NA	0.1484	Intracerebral haemmorrhage || id:finn-b-I9_ICH	Intracerebral haemmorrhage	Intracerebral haemmorrhage || ||	TRUE	igd	NA	NA	NA	NA	NA	NA	NA	4	65775277	7.00003e-09	447961	0.000933241	ukb-b-10093	TRUE	reported	igd	2	TRUE
Tense / 'highly strung'	rs11744052	T	C	T	C	-0.0047583	-0.0544	0.30752	0.4001	FALSE	FALSE	FALSE	finn-b-I9_ICH	5	153596545	0.0364	NA	0.1347	Intracerebral haemmorrhage || id:finn-b-I9_ICH	Intracerebral haemmorrhage	Intracerebral haemmorrhage || ||	TRUE	igd	NA	NA	NA	NA	NA	NA	NA	5	153596545	1.29999e-07	447961	0.000901473	ukb-b-10093	TRUE	reported	igd	2	TRUE
Tense / 'highly strung'	rs1186767	C	G	C	G	0.00554236	-0.0661	0.839604	0.8636	FALSE	TRUE	FALSE	finn-b-I9_ICH	16	54621336	0.051	NA	0.1948	Intracerebral haemmorrhage || id:finn-b-I9_ICH	Intracerebral haemmorrhage	Intracerebral haemmorrhage || ||	TRUE	igd	NA	NA	NA	NA	NA	NA	NA	16	54621336	4.09996e-07	447961	0.00109397	ukb-b-10093	TRUE	reported	igd	2	TRUE
Tense / 'highly strung'	rs12068763	G	T	G	T	-0.00502502	0.0573	0.218244	0.2907	FALSE	FALSE	FALSE	finn-b-I9_ICH	1	98442308	0.0387	NA	0.1381	Intracerebral haemmorrhage || id:finn-b-I9_ICH	Intracerebral haemmorrhage	Intracerebral haemmorrhage || ||	TRUE	igd	NA	NA	NA	NA	NA	NA	NA	1	98442308	2.19999e-07	447961	0.000969287	ukb-b-10093	TRUE	reported	igd	2	TRUE
Tense / 'highly strung'	rs12203592	T	C	T	C	0.00510248	-0.0841	0.219867	0.03075	FALSE	FALSE	FALSE	finn-b-I9_ICH	6	396321	0.1061	NA	0.4278	Intracerebral haemmorrhage || id:finn-b-I9_ICH	Intracerebral haemmorrhage	Intracerebral haemmorrhage || ||	TRUE	igd	NA	NA	NA	NA	NA	NA	NA	6	396321	8e-08	447961	0.000950811	ukb-b-10093	TRUE	reported	igd	2	TRUE
Tense / 'highly strung'	rs12271634	T	C	T	C	-0.00538131	0.0829	0.148024	0.1019	FALSE	FALSE	FALSE	finn-b-I9_ICH	11	79197201	0.0583	NA	0.1551	Intracerebral haemmorrhage || id:finn-b-I9_ICH	Intracerebral haemmorrhage	Intracerebral haemmorrhage || ||	TRUE	igd	NA	NA	NA	NA	NA	NA	NA	11	79197201	1.79999e-06	447961	0.00112757	ukb-b-10093	TRUE	reported	igd	2	TRUE
Tense / 'highly strung'	rs12494287	T	C	T	C	-0.00717388	0.0911	0.091383	0.1001	FALSE	FALSE	FALSE	finn-b-I9_ICH	3	59220094	0.0592	NA	0.1235	Intracerebral haemmorrhage || id:finn-b-I9_ICH	Intracerebral haemmorrhage	Intracerebral haemmorrhage || ||	TRUE	igd	NA	NA	NA	NA	NA	NA	NA	3	59220094	4.49997e-07	447961	0.00142178	ukb-b-10093	TRUE	reported	igd	2	TRUE
Tense / 'highly strung'	rs12533623	A	G	A	G	0.00471865	0.0166	0.360126	0.4855	FALSE	FALSE	FALSE	finn-b-I9_ICH	7	71516821	0.0352	NA	0.6376	Intracerebral haemmorrhage || id:finn-b-I9_ICH	Intracerebral haemmorrhage	Intracerebral haemmorrhage || ||	TRUE	igd	NA	NA	NA	NA	NA	NA	NA	7	71516821	1.6e-08	447961	0.00083532	ukb-b-10093	TRUE	reported	igd	2	TRUE
Tense / 'highly strung'	rs12548698	G	C	G	C	0.00477993	0.0417	0.187357	0.273	FALSE	TRUE	FALSE	finn-b-I9_ICH	8	70814281	0.0397	NA	0.2942	Intracerebral haemmorrhage || id:finn-b-I9_ICH	Intracerebral haemmorrhage	Intracerebral haemmorrhage || ||	TRUE	igd	NA	NA	NA	NA	NA	NA	NA	8	70814281	3.50002e-06	447961	0.00103016	ukb-b-10093	TRUE	reported	igd	2	TRUE
Tense / 'highly strung'	rs12600578	C	T	C	T	-0.00484582	-0.012	0.302148	0.4277	FALSE	FALSE	FALSE	finn-b-I9_ICH	17	5299950	0.0357	NA	0.737199	Intracerebral haemmorrhage || id:finn-b-I9_ICH	Intracerebral haemmorrhage	Intracerebral haemmorrhage || ||	TRUE	igd	NA	NA	NA	NA	NA	NA	NA	17	5299950	2.80001e-08	447961	0.00087243	ukb-b-10093	TRUE	reported	igd	2	TRUE
Tense / 'highly strung'	rs1289871	A	G	A	G	-0.00398609	-0.0616	0.369639	0.4068	FALSE	FALSE	FALSE	finn-b-I9_ICH	1	117864089	0.0358	NA	0.0855993	Intracerebral haemmorrhage || id:finn-b-I9_ICH	Intracerebral haemmorrhage	Intracerebral haemmorrhage || ||	TRUE	igd	NA	NA	NA	NA	NA	NA	NA	1	117864089	1.6e-06	447961	0.000830127	ukb-b-10093	TRUE	reported	igd	2	TRUE
Tense / 'highly strung'	rs13119680	A	G	A	G	0.0147812	-0.0443	0.016359	0.01542	FALSE	FALSE	FALSE	finn-b-I9_ICH	4	159511564	0.1442	NA	0.7586	Intracerebral haemmorrhage || id:finn-b-I9_ICH	Intracerebral haemmorrhage	Intracerebral haemmorrhage || ||	TRUE	igd	NA	NA	NA	NA	NA	NA	NA	4	159511564	4.49997e-06	447961	0.00322239	ukb-b-10093	TRUE	reported	igd	2	TRUE
Tense / 'highly strung'	rs13133213	G	A	G	A	0.00370917	0.0146	0.506282	0.5147	FALSE	FALSE	FALSE	finn-b-I9_ICH	4	15646794	0.0352	NA	0.6773	Intracerebral haemmorrhage || id:finn-b-I9_ICH	Intracerebral haemmorrhage	Intracerebral haemmorrhage || ||	TRUE	igd	NA	NA	NA	NA	NA	NA	NA	4	15646794	3.40001e-06	447961	0.000798484	ukb-b-10093	TRUE	reported	igd	2	TRUE
Tense / 'highly strung'	rs13144425	G	A	G	A	0.00405174	0.0275	0.500938	0.4968	FALSE	FALSE	FALSE	finn-b-I9_ICH	4	170851413	0.0354	NA	0.4379	Intracerebral haemmorrhage || id:finn-b-I9_ICH	Intracerebral haemmorrhage	Intracerebral haemmorrhage || ||	TRUE	igd	NA	NA	NA	NA	NA	NA	NA	4	170851413	5.19996e-07	447961	0.000807513	ukb-b-10093	TRUE	reported	igd	2	TRUE
Tense / 'highly strung'	rs13315936	C	T	C	T	-0.00503562	-0.0265	0.165318	0.2176	FALSE	FALSE	FALSE	finn-b-I9_ICH	3	166739313	0.0426	NA	0.5346	Intracerebral haemmorrhage || id:finn-b-I9_ICH	Intracerebral haemmorrhage	Intracerebral haemmorrhage || ||	TRUE	igd	NA	NA	NA	NA	NA	NA	NA	3	166739313	2.90001e-06	447961	0.00107635	ukb-b-10093	TRUE	reported	igd	2	TRUE
Tense / 'highly strung'	rs13356445	T	C	T	C	0.00661424	-0.0345	0.214611	0.1697	FALSE	FALSE	FALSE	finn-b-I9_ICH	5	87248847	0.0468	NA	0.4612	Intracerebral haemmorrhage || id:finn-b-I9_ICH	Intracerebral haemmorrhage	Intracerebral haemmorrhage || ||	TRUE	igd	NA	NA	NA	NA	NA	NA	NA	5	87248847	1.10002e-11	447961	0.000974426	ukb-b-10093	TRUE	reported	igd	2	TRUE
Tense / 'highly strung'	rs13411680	G	T	G	T	0.0043186	0.0381	0.383323	0.4806	FALSE	FALSE	FALSE	finn-b-I9_ICH	2	148896268	0.0353	NA	0.2802	Intracerebral haemmorrhage || id:finn-b-I9_ICH	Intracerebral haemmorrhage	Intracerebral haemmorrhage || ||	TRUE	igd	NA	NA	NA	NA	NA	NA	NA	2	148896268	1.6e-07	447961	0.000823201	ukb-b-10093	TRUE	reported	igd	2	TRUE
Tense / 'highly strung'	rs1353492	A	G	A	G	-0.00716002	-0.0019	0.084605	0.0969	FALSE	FALSE	FALSE	finn-b-I9_ICH	5	92446044	0.0598	NA	0.9753	Intracerebral haemmorrhage || id:finn-b-I9_ICH	Intracerebral haemmorrhage	Intracerebral haemmorrhage || ||	TRUE	igd	NA	NA	NA	NA	NA	NA	NA	5	92446044	6.29999e-07	447961	0.00143751	ukb-b-10093	TRUE	reported	igd	2	TRUE
Tense / 'highly strung'	rs142584901	A	T	A	T	0.012254	-0.2797	0.027801	0.01435	FALSE	TRUE	FALSE	finn-b-I9_ICH	11	82336953	0.1506	NA	0.0633199	Intracerebral haemmorrhage || id:finn-b-I9_ICH	Intracerebral haemmorrhage	Intracerebral haemmorrhage || ||	TRUE	igd	NA	NA	NA	NA	NA	NA	NA	11	82336953	1.09999e-06	447961	0.00251745	ukb-b-10093	TRUE	reported	igd	2	TRUE
Tense / 'highly strung'	rs143413535	T	G	T	G	0.0065063	0.0913	0.101649	0.06231	FALSE	FALSE	FALSE	finn-b-I9_ICH	10	68779008	0.0734	NA	0.2131	Intracerebral haemmorrhage || id:finn-b-I9_ICH	Intracerebral haemmorrhage	Intracerebral haemmorrhage || ||	TRUE	igd	NA	NA	NA	NA	NA	NA	NA	10	68779008	1.09999e-06	447961	0.00133445	ukb-b-10093	TRUE	reported	igd	2	TRUE
Tense / 'highly strung'	rs1450832	A	G	A	G	0.00597417	-0.0212	0.291568	0.269	FALSE	FALSE	FALSE	finn-b-I9_ICH	7	113863384	0.0398	NA	0.5932	Intracerebral haemmorrhage || id:finn-b-I9_ICH	Intracerebral haemmorrhage	Intracerebral haemmorrhage || ||	TRUE	igd	NA	NA	NA	NA	NA	NA	NA	7	113863384	1.39991e-11	447961	0.000883615	ukb-b-10093	TRUE	reported	igd	2	TRUE
Tense / 'highly strung'	rs1468373	T	C	T	C	-0.00393363	-0.0342	0.522771	0.5393	FALSE	FALSE	FALSE	finn-b-I9_ICH	14	72210756	0.0353	NA	0.332	Intracerebral haemmorrhage || id:finn-b-I9_ICH	Intracerebral haemmorrhage	Intracerebral haemmorrhage || ||	TRUE	igd	NA	NA	NA	NA	NA	NA	NA	14	72210756	9.49992e-07	447961	0.000802645	ukb-b-10093	TRUE	reported	igd	2	TRUE
Tense / 'highly strung'	rs1493876	T	C	T	C	0.00402912	-0.0294	0.664702	0.6494	FALSE	FALSE	FALSE	finn-b-I9_ICH	16	17847935	0.037	NA	0.4269	Intracerebral haemmorrhage || id:finn-b-I9_ICH	Intracerebral haemmorrhage	Intracerebral haemmorrhage || ||	TRUE	igd	NA	NA	NA	NA	NA	NA	NA	16	17847935	2e-06	447961	0.000847645	ukb-b-10093	TRUE	reported	igd	2	TRUE
Tense / 'highly strung'	rs149523467	C	G	C	G	-0.00836577	0.0616	0.055357	0.02506	FALSE	TRUE	FALSE	finn-b-I9_ICH	9	94410379	0.1147	NA	0.591199	Intracerebral haemmorrhage || id:finn-b-I9_ICH	Intracerebral haemmorrhage	Intracerebral haemmorrhage || ||	TRUE	igd	NA	NA	NA	NA	NA	NA	NA	9	94410379	3.50002e-06	447961	0.00180296	ukb-b-10093	TRUE	reported	igd	2	TRUE
Tense / 'highly strung'	rs1501270	A	C	A	C	-0.00545379	-0.0189	0.247269	0.2421	FALSE	FALSE	FALSE	finn-b-I9_ICH	4	105011169	0.0413	NA	0.6468	Intracerebral haemmorrhage || id:finn-b-I9_ICH	Intracerebral haemmorrhage	Intracerebral haemmorrhage || ||	TRUE	igd	NA	NA	NA	NA	NA	NA	NA	4	105011169	3.79997e-09	447961	0.000925364	ukb-b-10093	TRUE	reported	igd	2	TRUE
Tense / 'highly strung'	rs150592538	A	T	A	T	-0.0120034	-0.2171	0.026498	0.03808	FALSE	TRUE	FALSE	finn-b-I9_ICH	4	25578979	0.0924	NA	0.0187698	Intracerebral haemmorrhage || id:finn-b-I9_ICH	Intracerebral haemmorrhage	Intracerebral haemmorrhage || ||	TRUE	igd	NA	NA	NA	NA	NA	NA	NA	4	25578979	3.59998e-06	447961	0.0025914	ukb-b-10093	TRUE	reported	igd	2	TRUE
Tense / 'highly strung'	rs1582589	G	A	G	A	-0.0042476	-0.0411	0.343311	0.3512	FALSE	FALSE	FALSE	finn-b-I9_ICH	16	71686054	0.0368	NA	0.2647	Intracerebral haemmorrhage || id:finn-b-I9_ICH	Intracerebral haemmorrhage	Intracerebral haemmorrhage || ||	TRUE	igd	NA	NA	NA	NA	NA	NA	NA	16	71686054	4.39997e-07	447961	0.000841273	ukb-b-10093	TRUE	reported	igd	2	TRUE
Tense / 'highly strung'	rs16930577	A	T	A	T	0.017032	0.069	0.012179	0.02138	FALSE	TRUE	FALSE	finn-b-I9_ICH	9	13621820	0.1198	NA	0.5647	Intracerebral haemmorrhage || id:finn-b-I9_ICH	Intracerebral haemmorrhage	Intracerebral haemmorrhage || ||	TRUE	igd	NA	NA	NA	NA	NA	NA	NA	9	13621820	3.89996e-06	447961	0.00369005	ukb-b-10093	TRUE	reported	igd	2	TRUE
Tense / 'highly strung'	rs1712981	A	G	A	G	0.00554399	-0.0501	0.134838	0.1533	FALSE	FALSE	FALSE	finn-b-I9_ICH	3	116276966	0.0487	NA	0.3043	Intracerebral haemmorrhage || id:finn-b-I9_ICH	Intracerebral haemmorrhage	Intracerebral haemmorrhage || ||	TRUE	igd	NA	NA	NA	NA	NA	NA	NA	3	116276966	2.30001e-06	447961	0.00117228	ukb-b-10093	TRUE	reported	igd	2	TRUE
Tense / 'highly strung'	rs1714505	T	C	T	C	-0.00742222	-0.0455	0.079596	0.09291	FALSE	FALSE	FALSE	finn-b-I9_ICH	3	158237051	0.0604	NA	0.4512	Intracerebral haemmorrhage || id:finn-b-I9_ICH	Intracerebral haemmorrhage	Intracerebral haemmorrhage || ||	TRUE	igd	NA	NA	NA	NA	NA	NA	NA	3	158237051	5.19996e-07	447961	0.00147848	ukb-b-10093	TRUE	reported	igd	2	TRUE
Tense / 'highly strung'	rs17276940	T	C	T	C	0.0139171	-0.0639	0.019314	0.03991	FALSE	FALSE	FALSE	finn-b-I9_ICH	14	20486115	0.0899	NA	0.4771	Intracerebral haemmorrhage || id:finn-b-I9_ICH	Intracerebral haemmorrhage	Intracerebral haemmorrhage || ||	TRUE	igd	NA	NA	NA	NA	NA	NA	NA	14	20486115	3.89996e-06	447961	0.00301555	ukb-b-10093	TRUE	reported	igd	2	TRUE
Tense / 'highly strung'	rs17408395	G	A	G	A	-0.00449429	0.0196	0.211596	0.2052	FALSE	FALSE	FALSE	finn-b-I9_ICH	12	24259884	0.0437	NA	0.6534	Intracerebral haemmorrhage || id:finn-b-I9_ICH	Intracerebral haemmorrhage	Intracerebral haemmorrhage || ||	TRUE	igd	NA	NA	NA	NA	NA	NA	NA	12	24259884	4.60002e-06	447961	0.000980436	ukb-b-10093	TRUE	reported	igd	2	TRUE
Tense / 'highly strung'	rs1782170	C	A	C	A	0.0046482	0.0381	0.723984	0.7066	FALSE	FALSE	FALSE	finn-b-I9_ICH	14	41674903	0.0387	NA	0.3249	Intracerebral haemmorrhage || id:finn-b-I9_ICH	Intracerebral haemmorrhage	Intracerebral haemmorrhage || ||	TRUE	igd	NA	NA	NA	NA	NA	NA	NA	14	41674903	2.30001e-07	447961	0.00089838	ukb-b-10093	TRUE	reported	igd	2	TRUE
Tense / 'highly strung'	rs198459	A	G	A	G	-0.00506035	0.0186	0.216795	0.1248	FALSE	FALSE	FALSE	finn-b-I9_ICH	11	61525020	0.0543	NA	0.7319	Intracerebral haemmorrhage || id:finn-b-I9_ICH	Intracerebral haemmorrhage	Intracerebral haemmorrhage || ||	TRUE	igd	NA	NA	NA	NA	NA	NA	NA	11	61525020	2e-07	447961	0.000973244	ukb-b-10093	TRUE	reported	igd	2	TRUE
Tense / 'highly strung'	rs203477	C	A	C	A	0.00459327	0.0585	0.398115	0.3464	FALSE	FALSE	FALSE	finn-b-I9_ICH	17	19831819	0.0368	NA	0.1122	Intracerebral haemmorrhage || id:finn-b-I9_ICH	Intracerebral haemmorrhage	Intracerebral haemmorrhage || ||	TRUE	igd	NA	NA	NA	NA	NA	NA	NA	17	19831819	1.89998e-08	447961	0.000816983	ukb-b-10093	TRUE	reported	igd	2	TRUE
Tense / 'highly strung'	rs2097247	T	C	T	C	0.00789843	-0.0611	0.096815	0.132	FALSE	FALSE	FALSE	finn-b-I9_ICH	3	50290902	0.052	NA	0.2399	Intracerebral haemmorrhage || id:finn-b-I9_ICH	Intracerebral haemmorrhage	Intracerebral haemmorrhage || ||	TRUE	igd	NA	NA	NA	NA	NA	NA	NA	3	50290902	5.19996e-09	447961	0.00135198	ukb-b-10093	TRUE	reported	igd	2	TRUE
Tense / 'highly strung'	rs2117750	G	C	G	C	-0.00658478	0.0126	0.884376	0.9061	FALSE	TRUE	FALSE	finn-b-I9_ICH	16	87535301	0.0605	NA	0.8344	Intracerebral haemmorrhage || id:finn-b-I9_ICH	Intracerebral haemmorrhage	Intracerebral haemmorrhage || ||	TRUE	igd	NA	NA	NA	NA	NA	NA	NA	16	87535301	1.79999e-07	447961	0.00126266	ukb-b-10093	TRUE	reported	igd	2	TRUE
Tense / 'highly strung'	rs2149534	C	A	C	A	0.00629335	0.0269	0.128912	0.1414	FALSE	FALSE	FALSE	finn-b-I9_ICH	6	83677416	0.0504	NA	0.5936	Intracerebral haemmorrhage || id:finn-b-I9_ICH	Intracerebral haemmorrhage	Intracerebral haemmorrhage || ||	TRUE	igd	NA	NA	NA	NA	NA	NA	NA	6	83677416	1.40001e-07	447961	0.00119432	ukb-b-10093	TRUE	reported	igd	2	TRUE
Tense / 'highly strung'	rs2173710	C	G	C	G	0.0049034	-0.0735	0.584291	0.6154	FALSE	TRUE	FALSE	finn-b-I9_ICH	9	8402501	0.0361	NA	0.0417398	Intracerebral haemmorrhage || id:finn-b-I9_ICH	Intracerebral haemmorrhage	Intracerebral haemmorrhage || ||	TRUE	igd	NA	NA	NA	NA	NA	NA	NA	9	8402501	1.6e-09	447961	0.000812314	ukb-b-10093	TRUE	reported	igd	2	TRUE
Tense / 'highly strung'	rs2238635	G	A	G	A	0.00408495	-0.0208	0.590134	0.5773	FALSE	FALSE	FALSE	finn-b-I9_ICH	19	5230938	0.0357	NA	0.5603	Intracerebral haemmorrhage || id:finn-b-I9_ICH	Intracerebral haemmorrhage	Intracerebral haemmorrhage || ||	TRUE	igd	NA	NA	NA	NA	NA	NA	NA	19	5230938	5.69994e-07	447961	0.00081672	ukb-b-10093	TRUE	reported	igd	2	TRUE
Tense / 'highly strung'	rs2357711	G	A	G	A	-0.00394382	0.003	0.428204	0.4279	FALSE	FALSE	FALSE	finn-b-I9_ICH	7	13644907	0.0358	NA	0.9334	Intracerebral haemmorrhage || id:finn-b-I9_ICH	Intracerebral haemmorrhage	Intracerebral haemmorrhage || ||	TRUE	igd	NA	NA	NA	NA	NA	NA	NA	7	13644907	1.2e-06	447961	0.000813197	ukb-b-10093	TRUE	reported	igd	2	TRUE
Tense / 'highly strung'	rs253756	A	G	A	G	-0.00385567	-0.04	0.365985	0.3379	FALSE	FALSE	FALSE	finn-b-I9_ICH	5	102620472	0.0372	NA	0.2816	Intracerebral haemmorrhage || id:finn-b-I9_ICH	Intracerebral haemmorrhage	Intracerebral haemmorrhage || ||	TRUE	igd	NA	NA	NA	NA	NA	NA	NA	5	102620472	3.50002e-06	447961	0.000831485	ukb-b-10093	TRUE	reported	igd	2	TRUE
Tense / 'highly strung'	rs261940	G	A	G	A	0.00427496	-0.0447	0.472584	0.3836	FALSE	FALSE	FALSE	finn-b-I9_ICH	12	22872641	0.0363	NA	0.2185	Intracerebral haemmorrhage || id:finn-b-I9_ICH	Intracerebral haemmorrhage	Intracerebral haemmorrhage || ||	TRUE	igd	NA	NA	NA	NA	NA	NA	NA	12	22872641	1.2e-07	447961	0.000807689	ukb-b-10093	TRUE	reported	igd	2	TRUE
Tense / 'highly strung'	rs2710331	C	T	C	T	-0.0040677	-0.0022	0.342076	0.3835	FALSE	FALSE	FALSE	finn-b-I9_ICH	3	52837855	0.0361	NA	0.9524	Intracerebral haemmorrhage || id:finn-b-I9_ICH	Intracerebral haemmorrhage	Intracerebral haemmorrhage || ||	TRUE	igd	NA	NA	NA	NA	NA	NA	NA	3	52837855	1.5e-06	447961	0.000844695	ukb-b-10093	TRUE	reported	igd	2	TRUE
Tense / 'highly strung'	rs28483536	T	C	T	C	0.00586753	-0.1079	0.135866	0.1354	FALSE	FALSE	FALSE	finn-b-I9_ICH	4	135791706	0.0524	NA	0.0394803	Intracerebral haemmorrhage || id:finn-b-I9_ICH	Intracerebral haemmorrhage	Intracerebral haemmorrhage || ||	TRUE	igd	NA	NA	NA	NA	NA	NA	NA	4	135791706	2.30001e-06	447961	0.00124146	ukb-b-10093	TRUE	reported	igd	2	TRUE
Tense / 'highly strung'	rs2921036	C	T	C	T	-0.00628283	-0.0392	0.508542	0.5554	FALSE	FALSE	FALSE	finn-b-I9_ICH	8	8363897	0.0705	NA	0.577801	Intracerebral haemmorrhage || id:finn-b-I9_ICH	Intracerebral haemmorrhage	Intracerebral haemmorrhage || ||	TRUE	igd	NA	NA	NA	NA	NA	NA	NA	8	8363897	5.10035e-15	447961	0.000802926	ukb-b-10093	TRUE	reported	igd	2	TRUE
Tense / 'highly strung'	rs3026401	T	C	T	C	-0.00457653	0.1054	0.788015	0.7423	FALSE	FALSE	FALSE	finn-b-I9_ICH	11	31807524	0.0402	NA	0.00882592	Intracerebral haemmorrhage || id:finn-b-I9_ICH	Intracerebral haemmorrhage	Intracerebral haemmorrhage || ||	TRUE	igd	NA	NA	NA	NA	NA	NA	NA	11	31807524	3.2e-06	447961	0.000982712	ukb-b-10093	TRUE	reported	igd	2	TRUE
Tense / 'highly strung'	rs3130521	C	T	C	T	-0.00376711	0.004	0.615779	0.6652	FALSE	FALSE	FALSE	finn-b-I9_ICH	6	31196376	0.038	NA	0.9154	Intracerebral haemmorrhage || id:finn-b-I9_ICH	Intracerebral haemmorrhage	Intracerebral haemmorrhage || ||	TRUE	igd	NA	NA	NA	NA	NA	NA	NA	6	31196376	4.60002e-06	447961	0.000821903	ukb-b-10093	TRUE	reported	igd	2	TRUE
Tense / 'highly strung'	rs34011394	T	C	T	C	-0.00497782	-0.0244	0.434196	0.508	FALSE	FALSE	FALSE	finn-b-I9_ICH	22	41704872	0.0353	NA	0.4889	Intracerebral haemmorrhage || id:finn-b-I9_ICH	Intracerebral haemmorrhage	Intracerebral haemmorrhage || ||	TRUE	igd	NA	NA	NA	NA	NA	NA	NA	22	41704872	6.59994e-10	447961	0.000806223	ukb-b-10093	TRUE	reported	igd	2	TRUE
Tense / 'highly strung'	rs34264431	G	A	G	A	-0.00438094	0.0023	0.360372	0.387	FALSE	FALSE	FALSE	finn-b-I9_ICH	11	45686285	0.0362	NA	0.9496	Intracerebral haemmorrhage || id:finn-b-I9_ICH	Intracerebral haemmorrhage	Intracerebral haemmorrhage || ||	TRUE	igd	NA	NA	NA	NA	NA	NA	NA	11	45686285	1.5e-07	447961	0.000834887	ukb-b-10093	TRUE	reported	igd	2	TRUE
Tense / 'highly strung'	rs35182	A	G	A	G	0.00731824	0.0001	0.109676	0.0892	FALSE	FALSE	FALSE	finn-b-I9_ICH	16	65038674	0.0622	NA	0.9985	Intracerebral haemmorrhage || id:finn-b-I9_ICH	Intracerebral haemmorrhage	Intracerebral haemmorrhage || ||	TRUE	igd	NA	NA	NA	NA	NA	NA	NA	16	65038674	1.29999e-08	447961	0.00128829	ukb-b-10093	TRUE	reported	igd	2	TRUE
Tense / 'highly strung'	rs3740393	C	G	C	G	-0.00691022	0.0082	0.13735	0.1527	FALSE	TRUE	FALSE	finn-b-I9_ICH	10	104636655	0.0492	NA	0.8674	Intracerebral haemmorrhage || id:finn-b-I9_ICH	Intracerebral haemmorrhage	Intracerebral haemmorrhage || ||	TRUE	igd	NA	NA	NA	NA	NA	NA	NA	10	104636655	2.80001e-09	447961	0.00116296	ukb-b-10093	TRUE	reported	igd	2	TRUE
Tense / 'highly strung'	rs3751855	C	T	C	T	-0.00462481	-0.0273	0.383941	0.3957	FALSE	FALSE	FALSE	finn-b-I9_ICH	16	31091209	0.0358	NA	0.4462	Intracerebral haemmorrhage || id:finn-b-I9_ICH	Intracerebral haemmorrhage	Intracerebral haemmorrhage || ||	TRUE	igd	NA	NA	NA	NA	NA	NA	NA	16	31091209	1.79999e-08	447961	0.000821467	ukb-b-10093	TRUE	reported	igd	2	TRUE
Tense / 'highly strung'	rs3766492	G	C	G	C	0.00440772	0.0068	0.23467	0.2192	FALSE	TRUE	FALSE	finn-b-I9_ICH	1	233126779	0.0428	NA	0.874	Intracerebral haemmorrhage || id:finn-b-I9_ICH	Intracerebral haemmorrhage	Intracerebral haemmorrhage || ||	TRUE	igd	NA	NA	NA	NA	NA	NA	NA	1	233126779	3.69999e-06	447961	0.000952542	ukb-b-10093	TRUE	reported	igd	2	TRUE
Tense / 'highly strung'	rs3790112	T	G	T	G	-0.00429032	0.0504	0.309791	0.2485	FALSE	FALSE	FALSE	finn-b-I9_ICH	16	56381197	0.0407	NA	0.2153	Intracerebral haemmorrhage || id:finn-b-I9_ICH	Intracerebral haemmorrhage	Intracerebral haemmorrhage || ||	TRUE	igd	NA	NA	NA	NA	NA	NA	NA	16	56381197	6.90001e-07	447961	0.000864452	ukb-b-10093	TRUE	reported	igd	2	TRUE
Tense / 'highly strung'	rs396682	C	T	C	T	-0.00445443	0.046	0.216629	0.2186	FALSE	FALSE	FALSE	finn-b-I9_ICH	5	141073377	0.0427	NA	0.2812	Intracerebral haemmorrhage || id:finn-b-I9_ICH	Intracerebral haemmorrhage	Intracerebral haemmorrhage || ||	TRUE	igd	NA	NA	NA	NA	NA	NA	NA	5	141073377	4.60002e-06	447961	0.000972018	ukb-b-10093	TRUE	reported	igd	2	TRUE
Tense / 'highly strung'	rs4076427	C	G	C	G	0.004573	0.0371	0.390782	0.3227	FALSE	TRUE	FALSE	finn-b-I9_ICH	17	79087537	0.0376	NA	0.3238	Intracerebral haemmorrhage || id:finn-b-I9_ICH	Intracerebral haemmorrhage	Intracerebral haemmorrhage || ||	TRUE	igd	NA	NA	NA	NA	NA	NA	NA	17	79087537	2.99999e-08	447961	0.000825032	ukb-b-10093	TRUE	reported	igd	2	TRUE
Tense / 'highly strung'	rs4129585	C	A	C	A	-0.00555232	-0.0213	0.560831	0.5967	FALSE	FALSE	FALSE	finn-b-I9_ICH	8	143312933	0.0358	NA	0.552	Intracerebral haemmorrhage || id:finn-b-I9_ICH	Intracerebral haemmorrhage	Intracerebral haemmorrhage || ||	TRUE	igd	NA	NA	NA	NA	NA	NA	NA	8	143312933	5.30029e-12	447961	0.000804971	ukb-b-10093	TRUE	reported	igd	2	TRUE
Tense / 'highly strung'	rs4628252	T	G	T	G	0.00376543	0.0287	0.429146	0.3613	FALSE	FALSE	FALSE	finn-b-I9_ICH	8	21497171	0.0369	NA	0.4374	Intracerebral haemmorrhage || id:finn-b-I9_ICH	Intracerebral haemmorrhage	Intracerebral haemmorrhage || ||	TRUE	igd	NA	NA	NA	NA	NA	NA	NA	8	21497171	3.69999e-06	447961	0.000813488	ukb-b-10093	TRUE	reported	igd	2	TRUE
Tense / 'highly strung'	rs4671330	A	G	A	G	0.00496275	0.0531	0.662753	0.7457	FALSE	FALSE	FALSE	finn-b-I9_ICH	2	59042847	0.0405	NA	0.1896	Intracerebral haemmorrhage || id:finn-b-I9_ICH	Intracerebral haemmorrhage	Intracerebral haemmorrhage || ||	TRUE	igd	NA	NA	NA	NA	NA	NA	NA	2	59042847	4.20001e-09	447961	0.000844685	ukb-b-10093	TRUE	reported	igd	2	TRUE
Tense / 'highly strung'	rs4673866	G	A	G	A	0.00557216	-0.0174	0.860887	0.8613	FALSE	FALSE	FALSE	finn-b-I9_ICH	2	215453227	0.051	NA	0.7334	Intracerebral haemmorrhage || id:finn-b-I9_ICH	Intracerebral haemmorrhage	Intracerebral haemmorrhage || ||	TRUE	igd	NA	NA	NA	NA	NA	NA	NA	2	215453227	1.40001e-06	447961	0.00115517	ukb-b-10093	TRUE	reported	igd	2	TRUE
Tense / 'highly strung'	rs4702	A	G	A	G	-0.00403162	0.0472	0.556565	0.5285	FALSE	FALSE	FALSE	finn-b-I9_ICH	15	91426560	0.0355	NA	0.1835	Intracerebral haemmorrhage || id:finn-b-I9_ICH	Intracerebral haemmorrhage	Intracerebral haemmorrhage || ||	TRUE	igd	NA	NA	NA	NA	NA	NA	NA	15	91426560	5.39995e-07	447961	0.000804721	ukb-b-10093	TRUE	reported	igd	2	TRUE
Tense / 'highly strung'	rs4799461	G	A	G	A	-0.00506032	0.0014	0.758641	0.7887	FALSE	FALSE	FALSE	finn-b-I9_ICH	18	35185858	0.043	NA	0.9747	Intracerebral haemmorrhage || id:finn-b-I9_ICH	Intracerebral haemmorrhage	Intracerebral haemmorrhage || ||	TRUE	igd	NA	NA	NA	NA	NA	NA	NA	18	35185858	6.90001e-08	447961	0.000938036	ukb-b-10093	TRUE	reported	igd	2	TRUE
Tense / 'highly strung'	rs4799723	G	T	G	T	0.0040499	0.0012	0.507094	0.5384	FALSE	FALSE	FALSE	finn-b-I9_ICH	18	31367050	0.0352	NA	0.9733	Intracerebral haemmorrhage || id:finn-b-I9_ICH	Intracerebral haemmorrhage	Intracerebral haemmorrhage || ||	TRUE	igd	NA	NA	NA	NA	NA	NA	NA	18	31367050	4.70002e-07	447961	0.00080374	ukb-b-10093	TRUE	reported	igd	2	TRUE
Tense / 'highly strung'	rs4868608	A	C	A	C	0.00383228	0.0547	0.569509	0.6161	FALSE	FALSE	FALSE	finn-b-I9_ICH	5	175580605	0.0363	NA	0.1316	Intracerebral haemmorrhage || id:finn-b-I9_ICH	Intracerebral haemmorrhage	Intracerebral haemmorrhage || ||	TRUE	igd	NA	NA	NA	NA	NA	NA	NA	5	175580605	2.1e-06	447961	0.000808408	ukb-b-10093	TRUE	reported	igd	2	TRUE
Tense / 'highly strung'	rs4908507	T	C	T	C	-0.00506629	-0.0432	0.616373	0.6823	FALSE	FALSE	FALSE	finn-b-I9_ICH	1	8738937	0.0377	NA	0.252	Intracerebral haemmorrhage || id:finn-b-I9_ICH	Intracerebral haemmorrhage	Intracerebral haemmorrhage || ||	TRUE	igd	NA	NA	NA	NA	NA	NA	NA	1	8738937	6.69993e-10	447961	0.000820824	ukb-b-10093	TRUE	reported	igd	2	TRUE
Tense / 'highly strung'	rs4956082	G	A	G	A	0.0045889	0.0197	0.212421	0.1696	FALSE	FALSE	FALSE	finn-b-I9_ICH	4	108179860	0.0471	NA	0.6751	Intracerebral haemmorrhage || id:finn-b-I9_ICH	Intracerebral haemmorrhage	Intracerebral haemmorrhage || ||	TRUE	igd	NA	NA	NA	NA	NA	NA	NA	4	108179860	3.29997e-06	447961	0.00098725	ukb-b-10093	TRUE	reported	igd	2	TRUE
Tense / 'highly strung'	rs5005788	A	G	A	G	0.00509559	-0.0328	0.22895	0.3057	FALSE	FALSE	FALSE	finn-b-I9_ICH	13	69370196	0.0383	NA	0.3919	Intracerebral haemmorrhage || id:finn-b-I9_ICH	Intracerebral haemmorrhage	Intracerebral haemmorrhage || ||	TRUE	igd	TRUE	rs5005788	rs9572016	A	G	T	C	13	69350243	8.19993e-07	447961	0.00103368	ukb-b-10093	TRUE	reported	igd	2	TRUE
Tense / 'highly strung'	rs512898	C	T	C	T	-0.0048952	0.0203	0.325158	0.3307	FALSE	FALSE	FALSE	finn-b-I9_ICH	1	177888429	0.0373	NA	0.5855	Intracerebral haemmorrhage || id:finn-b-I9_ICH	Intracerebral haemmorrhage	Intracerebral haemmorrhage || ||	TRUE	igd	NA	NA	NA	NA	NA	NA	NA	1	177888429	9.69996e-09	447961	0.000853451	ukb-b-10093	TRUE	reported	igd	2	TRUE
Tense / 'highly strung'	rs55672116	T	A	T	A	0.00479596	-0.019	0.203935	0.1636	FALSE	TRUE	FALSE	finn-b-I9_ICH	5	107781396	0.0477	NA	0.6909	Intracerebral haemmorrhage || id:finn-b-I9_ICH	Intracerebral haemmorrhage	Intracerebral haemmorrhage || ||	TRUE	igd	TRUE	rs55672116	rs6891140	T	A	G	A	5	107776094	1.79999e-06	447961	0.00100436	ukb-b-10093	TRUE	reported	igd	2	TRUE
Tense / 'highly strung'	rs57196886	G	A	G	A	-0.00530889	-0.0067	0.204384	0.2436	FALSE	FALSE	FALSE	finn-b-I9_ICH	2	157117768	0.0409	NA	0.8699	Intracerebral haemmorrhage || id:finn-b-I9_ICH	Intracerebral haemmorrhage	Intracerebral haemmorrhage || ||	TRUE	igd	NA	NA	NA	NA	NA	NA	NA	2	157117768	8.70001e-08	447961	0.000992009	ukb-b-10093	TRUE	reported	igd	2	TRUE
Tense / 'highly strung'	rs578174	G	A	G	A	-0.00618476	-0.0543	0.104951	0.06617	FALSE	FALSE	FALSE	finn-b-I9_ICH	11	89959637	0.0712	NA	0.4456	Intracerebral haemmorrhage || id:finn-b-I9_ICH	Intracerebral haemmorrhage	Intracerebral haemmorrhage || ||	TRUE	igd	NA	NA	NA	NA	NA	NA	NA	11	89959637	2.5e-06	447961	0.00131423	ukb-b-10093	TRUE	reported	igd	2	TRUE
Tense / 'highly strung'	rs57938858	G	C	G	C	-0.00476934	-0.0099	0.18556	0.1347	FALSE	TRUE	FALSE	finn-b-I9_ICH	15	43812457	0.0512	NA	0.8472	Intracerebral haemmorrhage || id:finn-b-I9_ICH	Intracerebral haemmorrhage	Intracerebral haemmorrhage || ||	TRUE	igd	NA	NA	NA	NA	NA	NA	NA	15	43812457	3.50002e-06	447961	0.00102758	ukb-b-10093	TRUE	reported	igd	2	TRUE
Tense / 'highly strung'	rs583639	C	T	C	T	0.00651538	0.0491	0.909425	0.8719	FALSE	FALSE	FALSE	finn-b-I9_ICH	18	55546006	0.053	NA	0.3549	Intracerebral haemmorrhage || id:finn-b-I9_ICH	Intracerebral haemmorrhage	Intracerebral haemmorrhage || ||	TRUE	igd	NA	NA	NA	NA	NA	NA	NA	18	55546006	2.90001e-06	447961	0.00139295	ukb-b-10093	TRUE	reported	igd	2	TRUE
Tense / 'highly strung'	rs60931260	T	C	T	C	0.00660441	-0.04	0.097914	0.1255	FALSE	FALSE	FALSE	finn-b-I9_ICH	10	134932735	0.0535	NA	0.4544	Intracerebral haemmorrhage || id:finn-b-I9_ICH	Intracerebral haemmorrhage	Intracerebral haemmorrhage || ||	TRUE	igd	NA	NA	NA	NA	NA	NA	NA	10	134932735	8.99995e-07	447961	0.00134469	ukb-b-10093	TRUE	reported	igd	2	TRUE
Tense / 'highly strung'	rs61731122	A	G	A	G	-0.0114925	-0.0531	0.029459	0.0202	FALSE	FALSE	FALSE	finn-b-I9_ICH	1	65098309	0.1273	NA	0.6766	Intracerebral haemmorrhage || id:finn-b-I9_ICH	Intracerebral haemmorrhage	Intracerebral haemmorrhage || ||	TRUE	igd	NA	NA	NA	NA	NA	NA	NA	1	65098309	1.2e-06	447961	0.00236394	ukb-b-10093	TRUE	reported	igd	2	TRUE
Tense / 'highly strung'	rs61797288	A	G	A	G	-0.0104861	0.0226	0.032883	0.08116	FALSE	FALSE	FALSE	finn-b-I9_ICH	1	108553754	0.065	NA	0.7284	Intracerebral haemmorrhage || id:finn-b-I9_ICH	Intracerebral haemmorrhage	Intracerebral haemmorrhage || ||	TRUE	igd	NA	NA	NA	NA	NA	NA	NA	1	108553754	2.90001e-06	447961	0.00224207	ukb-b-10093	TRUE	reported	igd	2	TRUE
Tense / 'highly strung'	rs62039480	A	G	A	G	0.00395765	-0.0915	0.331963	0.3316	FALSE	FALSE	FALSE	finn-b-I9_ICH	16	15137450	0.0372	NA	0.0139101	Intracerebral haemmorrhage || id:finn-b-I9_ICH	Intracerebral haemmorrhage	Intracerebral haemmorrhage || ||	TRUE	igd	NA	NA	NA	NA	NA	NA	NA	16	15137450	3.09999e-06	447961	0.000848865	ukb-b-10093	TRUE	reported	igd	2	TRUE
Tense / 'highly strung'	rs62245974	G	A	G	A	-0.00672095	0.0481	0.129679	0.122	FALSE	FALSE	FALSE	finn-b-I9_ICH	3	16976888	0.0537	NA	0.3704	Intracerebral haemmorrhage || id:finn-b-I9_ICH	Intracerebral haemmorrhage	Intracerebral haemmorrhage || ||	TRUE	igd	NA	NA	NA	NA	NA	NA	NA	3	16976888	2.1e-08	447961	0.00119926	ukb-b-10093	TRUE	reported	igd	2	TRUE
Tense / 'highly strung'	rs6462381	T	C	T	C	0.00444847	0.0487	0.729552	0.7397	FALSE	FALSE	FALSE	finn-b-I9_ICH	7	32615553	0.0401	NA	0.2239	Intracerebral haemmorrhage || id:finn-b-I9_ICH	Intracerebral haemmorrhage	Intracerebral haemmorrhage || ||	TRUE	igd	NA	NA	NA	NA	NA	NA	NA	7	32615553	7.69999e-07	447961	0.000899851	ukb-b-10093	TRUE	reported	igd	2	TRUE
Tense / 'highly strung'	rs651548	G	A	G	A	0.0043487	-0.0367	0.638596	0.6396	FALSE	FALSE	FALSE	finn-b-I9_ICH	12	99560183	0.0367	NA	0.3176	Intracerebral haemmorrhage || id:finn-b-I9_ICH	Intracerebral haemmorrhage	Intracerebral haemmorrhage || ||	TRUE	igd	NA	NA	NA	NA	NA	NA	NA	12	99560183	1.89998e-07	447961	0.000834598	ukb-b-10093	TRUE	reported	igd	2	TRUE
Tense / 'highly strung'	rs6519955	T	G	T	G	-0.00392277	-0.0671	0.37867	0.2953	FALSE	FALSE	FALSE	finn-b-I9_ICH	22	46421842	0.0393	NA	0.0881292	Intracerebral haemmorrhage || id:finn-b-I9_ICH	Intracerebral haemmorrhage	Intracerebral haemmorrhage || ||	TRUE	igd	NA	NA	NA	NA	NA	NA	NA	22	46421842	2.1e-06	447961	0.000826328	ukb-b-10093	TRUE	reported	igd	2	TRUE
Tense / 'highly strung'	rs6663591	C	A	C	A	-0.00481511	0.0253	0.388445	0.3654	FALSE	FALSE	FALSE	finn-b-I9_ICH	1	174390997	0.0365	NA	0.4887	Intracerebral haemmorrhage || id:finn-b-I9_ICH	Intracerebral haemmorrhage	Intracerebral haemmorrhage || ||	TRUE	igd	NA	NA	NA	NA	NA	NA	NA	1	174390997	4.39997e-09	447961	0.000820396	ukb-b-10093	TRUE	reported	igd	2	TRUE
Tense / 'highly strung'	rs67295108	T	C	T	C	0.00702524	-0.0574	0.090601	0.1105	FALSE	FALSE	FALSE	finn-b-I9_ICH	12	22228428	0.0561	NA	0.3064	Intracerebral haemmorrhage || id:finn-b-I9_ICH	Intracerebral haemmorrhage	Intracerebral haemmorrhage || ||	TRUE	igd	NA	NA	NA	NA	NA	NA	NA	12	22228428	4.90004e-07	447961	0.00139698	ukb-b-10093	TRUE	reported	igd	2	TRUE
Tense / 'highly strung'	rs684195	C	A	C	A	-0.00473267	-0.0032	0.408795	0.5399	FALSE	FALSE	FALSE	finn-b-I9_ICH	3	135993599	0.0354	NA	0.9272	Intracerebral haemmorrhage || id:finn-b-I9_ICH	Intracerebral haemmorrhage	Intracerebral haemmorrhage || ||	TRUE	igd	NA	NA	NA	NA	NA	NA	NA	3	135993599	5.99998e-09	447961	0.000813534	ukb-b-10093	TRUE	reported	igd	2	TRUE
Tense / 'highly strung'	rs6891955	C	G	C	G	0.00558194	0.0115	0.349675	0.3555	FALSE	TRUE	FALSE	finn-b-I9_ICH	5	64838758	0.0367	NA	0.754401	Intracerebral haemmorrhage || id:finn-b-I9_ICH	Intracerebral haemmorrhage	Intracerebral haemmorrhage || ||	TRUE	igd	NA	NA	NA	NA	NA	NA	NA	5	64838758	2.99985e-11	447961	0.000839812	ukb-b-10093	TRUE	reported	igd	2	TRUE
Tense / 'highly strung'	rs6995965	T	C	T	C	-0.00940171	0.1476	0.937912	0.9458	FALSE	FALSE	FALSE	finn-b-I9_ICH	8	14174579	0.0775	NA	0.0569194	Intracerebral haemmorrhage || id:finn-b-I9_ICH	Intracerebral haemmorrhage	Intracerebral haemmorrhage || ||	TRUE	igd	NA	NA	NA	NA	NA	NA	NA	8	14174579	1.6e-08	447961	0.00166458	ukb-b-10093	TRUE	reported	igd	2	TRUE
Tense / 'highly strung'	rs7042825	C	T	C	T	0.00584456	-0.0038	0.87486	0.9108	FALSE	FALSE	FALSE	finn-b-I9_ICH	9	115168679	0.0613	NA	0.95	Intracerebral haemmorrhage || id:finn-b-I9_ICH	Intracerebral haemmorrhage	Intracerebral haemmorrhage || ||	TRUE	igd	NA	NA	NA	NA	NA	NA	NA	9	115168679	1.40001e-06	447961	0.00121072	ukb-b-10093	TRUE	reported	igd	2	TRUE
Tense / 'highly strung'	rs7105462	A	G	A	G	-0.00574246	-0.0081	0.593181	0.3692	FALSE	FALSE	FALSE	finn-b-I9_ICH	11	112912048	0.0367	NA	0.8243	Intracerebral haemmorrhage || id:finn-b-I9_ICH	Intracerebral haemmorrhage	Intracerebral haemmorrhage || ||	TRUE	igd	NA	NA	NA	NA	NA	NA	NA	11	112912048	1.9002e-12	447961	0.000815078	ukb-b-10093	TRUE	reported	igd	2	TRUE
Tense / 'highly strung'	rs7117205	C	T	C	T	0.00425043	-0.0094	0.319404	0.3639	FALSE	FALSE	FALSE	finn-b-I9_ICH	11	57641883	0.0364	NA	0.797	Intracerebral haemmorrhage || id:finn-b-I9_ICH	Intracerebral haemmorrhage	Intracerebral haemmorrhage || ||	TRUE	igd	NA	NA	NA	NA	NA	NA	NA	11	57641883	7.29995e-07	447961	0.000857999	ukb-b-10093	TRUE	reported	igd	2	TRUE
Tense / 'highly strung'	rs7194615	C	T	C	T	0.00468386	0.1133	0.550502	0.4578	FALSE	FALSE	FALSE	finn-b-I9_ICH	16	82769498	0.0352	NA	0.00129799	Intracerebral haemmorrhage || id:finn-b-I9_ICH	Intracerebral haemmorrhage	Intracerebral haemmorrhage || ||	TRUE	igd	NA	NA	NA	NA	NA	NA	NA	16	82769498	6.69993e-09	447961	0.000807913	ukb-b-10093	TRUE	reported	igd	2	TRUE
Tense / 'highly strung'	rs73004016	C	T	C	T	-0.00684662	-0.1686	0.112494	0.1132	FALSE	FALSE	FALSE	finn-b-I9_ICH	11	113444727	0.0563	NA	0.00273099	Intracerebral haemmorrhage || id:finn-b-I9_ICH	Intracerebral haemmorrhage	Intracerebral haemmorrhage || ||	TRUE	igd	NA	NA	NA	NA	NA	NA	NA	11	113444727	1.7e-07	447961	0.00131047	ukb-b-10093	TRUE	reported	igd	2	TRUE
Tense / 'highly strung'	rs75610186	T	G	T	G	0.00695021	0.0686	0.123823	0.08355	FALSE	FALSE	FALSE	finn-b-I9_ICH	2	86600056	0.0641	NA	0.284	Intracerebral haemmorrhage || id:finn-b-I9_ICH	Intracerebral haemmorrhage	Intracerebral haemmorrhage || ||	TRUE	igd	NA	NA	NA	NA	NA	NA	NA	2	86600056	1.09999e-08	447961	0.00121662	ukb-b-10093	TRUE	reported	igd	2	TRUE
Tense / 'highly strung'	rs7564766	C	T	C	T	-0.00426464	-0.0013	0.707198	0.6234	FALSE	FALSE	FALSE	finn-b-I9_ICH	2	162268842	0.0362	NA	0.9708	Intracerebral haemmorrhage || id:finn-b-I9_ICH	Intracerebral haemmorrhage	Intracerebral haemmorrhage || ||	TRUE	igd	NA	NA	NA	NA	NA	NA	NA	2	162268842	1.29999e-06	447961	0.000880432	ukb-b-10093	TRUE	reported	igd	2	TRUE
Tense / 'highly strung'	rs76643360	G	A	G	A	0.00672311	-0.0235	0.088075	0.07114	FALSE	FALSE	FALSE	finn-b-I9_ICH	5	74288973	0.0682	NA	0.7304	Intracerebral haemmorrhage || id:finn-b-I9_ICH	Intracerebral haemmorrhage	Intracerebral haemmorrhage || ||	TRUE	igd	NA	NA	NA	NA	NA	NA	NA	5	74288973	1.89998e-06	447961	0.00141023	ukb-b-10093	TRUE	reported	igd	2	TRUE
Tense / 'highly strung'	rs7669154	G	A	G	A	-0.00461626	0.0717	0.261805	0.2257	FALSE	FALSE	FALSE	finn-b-I9_ICH	4	42126201	0.0422	NA	0.0892298	Intracerebral haemmorrhage || id:finn-b-I9_ICH	Intracerebral haemmorrhage	Intracerebral haemmorrhage || ||	TRUE	igd	NA	NA	NA	NA	NA	NA	NA	4	42126201	4.49997e-07	447961	0.000914655	ukb-b-10093	TRUE	reported	igd	2	TRUE
Tense / 'highly strung'	rs7677084	C	T	C	T	-0.00544632	0.0726	0.86527	0.8956	FALSE	FALSE	FALSE	finn-b-I9_ICH	4	79864367	0.0577	NA	0.2083	Intracerebral haemmorrhage || id:finn-b-I9_ICH	Intracerebral haemmorrhage	Intracerebral haemmorrhage || ||	TRUE	igd	NA	NA	NA	NA	NA	NA	NA	4	79864367	3.40001e-06	447961	0.00117175	ukb-b-10093	TRUE	reported	igd	2	TRUE
Tense / 'highly strung'	rs7713898	A	G	A	G	0.00616765	-0.0577	0.116467	0.08866	FALSE	FALSE	FALSE	finn-b-I9_ICH	5	146678716	0.0629	NA	0.3585	Intracerebral haemmorrhage || id:finn-b-I9_ICH	Intracerebral haemmorrhage	Intracerebral haemmorrhage || ||	TRUE	igd	NA	NA	NA	NA	NA	NA	NA	5	146678716	1.89998e-06	447961	0.00129399	ukb-b-10093	TRUE	reported	igd	2	TRUE
Tense / 'highly strung'	rs7859267	G	T	G	T	0.00634312	0.0147	0.154774	0.2104	FALSE	FALSE	FALSE	finn-b-I9_ICH	9	96189109	0.0431	NA	0.733	Intracerebral haemmorrhage || id:finn-b-I9_ICH	Intracerebral haemmorrhage	Intracerebral haemmorrhage || ||	TRUE	igd	NA	NA	NA	NA	NA	NA	NA	9	96189109	1e-08	447961	0.00110704	ukb-b-10093	TRUE	reported	igd	2	TRUE
Tense / 'highly strung'	rs79174895	C	T	C	T	-0.00557931	0.0558	0.157121	0.1489	FALSE	FALSE	FALSE	finn-b-I9_ICH	5	45279858	0.0494	NA	0.2579	Intracerebral haemmorrhage || id:finn-b-I9_ICH	Intracerebral haemmorrhage	Intracerebral haemmorrhage || ||	TRUE	igd	TRUE	rs79174895	rs62367520	C	T	C	A	5	45266807	1.6e-06	447961	0.00116171	ukb-b-10093	TRUE	reported	igd	2	TRUE
Tense / 'highly strung'	rs79472431	T	C	T	C	-0.00614893	0.0252	0.189088	0.2197	FALSE	FALSE	FALSE	finn-b-I9_ICH	20	18730863	0.0424	NA	0.5516	Intracerebral haemmorrhage || id:finn-b-I9_ICH	Intracerebral haemmorrhage	Intracerebral haemmorrhage || ||	TRUE	igd	NA	NA	NA	NA	NA	NA	NA	20	18730863	1.79999e-09	447961	0.00102218	ukb-b-10093	TRUE	reported	igd	2	TRUE
Tense / 'highly strung'	rs79780963	T	C	T	C	-0.00808712	-0.0325	0.077376	0.08319	FALSE	FALSE	FALSE	finn-b-I9_ICH	10	104952499	0.064	NA	0.611499	Intracerebral haemmorrhage || id:finn-b-I9_ICH	Intracerebral haemmorrhage	Intracerebral haemmorrhage || ||	TRUE	igd	NA	NA	NA	NA	NA	NA	NA	10	104952499	6.29999e-08	447961	0.00149498	ukb-b-10093	TRUE	reported	igd	2	TRUE
Tense / 'highly strung'	rs79899616	G	A	G	A	0.0114826	0.031	0.028714	0.05201	FALSE	FALSE	FALSE	finn-b-I9_ICH	6	120231442	0.0789	NA	0.6944	Intracerebral haemmorrhage || id:finn-b-I9_ICH	Intracerebral haemmorrhage	Intracerebral haemmorrhage || ||	TRUE	igd	NA	NA	NA	NA	NA	NA	NA	6	120231442	2.39999e-06	447961	0.002435	ukb-b-10093	TRUE	reported	igd	2	TRUE
Tense / 'highly strung'	rs79994730	T	C	T	C	-0.00987584	0.1882	0.049487	0.01874	FALSE	FALSE	FALSE	finn-b-I9_ICH	1	75562222	0.1294	NA	0.1459	Intracerebral haemmorrhage || id:finn-b-I9_ICH	Intracerebral haemmorrhage	Intracerebral haemmorrhage || ||	TRUE	igd	NA	NA	NA	NA	NA	NA	NA	1	75562222	9.59997e-08	447961	0.00185115	ukb-b-10093	TRUE	reported	igd	2	TRUE
Tense / 'highly strung'	rs800907	C	T	C	T	-0.00402336	-0.0689	0.504725	0.4684	FALSE	FALSE	FALSE	finn-b-I9_ICH	8	116429663	0.0355	NA	0.0520595	Intracerebral haemmorrhage || id:finn-b-I9_ICH	Intracerebral haemmorrhage	Intracerebral haemmorrhage || ||	TRUE	igd	NA	NA	NA	NA	NA	NA	NA	8	116429663	5.39995e-07	447961	0.000802862	ukb-b-10093	TRUE	reported	igd	2	TRUE
Tense / 'highly strung'	rs8029317	C	T	C	T	-0.00649261	-0.0681	0.881332	0.923	FALSE	FALSE	FALSE	finn-b-I9_ICH	15	29858805	0.0664	NA	0.3051	Intracerebral haemmorrhage || id:finn-b-I9_ICH	Intracerebral haemmorrhage	Intracerebral haemmorrhage || ||	TRUE	igd	NA	NA	NA	NA	NA	NA	NA	15	29858805	1.89998e-07	447961	0.0012456	ukb-b-10093	TRUE	reported	igd	2	TRUE
Tense / 'highly strung'	rs8067056	C	T	C	T	0.00466228	-0.032	0.376468	0.2599	FALSE	FALSE	FALSE	finn-b-I9_ICH	17	44083948	0.0404	NA	0.4276	Intracerebral haemmorrhage || id:finn-b-I9_ICH	Intracerebral haemmorrhage	Intracerebral haemmorrhage || ||	TRUE	igd	NA	NA	NA	NA	NA	NA	NA	17	44083948	1.6e-08	447961	0.000824967	ukb-b-10093	TRUE	reported	igd	2	TRUE
Tense / 'highly strung'	rs8084239	C	T	C	T	0.00467757	0.0889	0.511986	0.46	FALSE	FALSE	FALSE	finn-b-I9_ICH	18	50725943	0.0354	NA	0.0119201	Intracerebral haemmorrhage || id:finn-b-I9_ICH	Intracerebral haemmorrhage	Intracerebral haemmorrhage || ||	TRUE	igd	NA	NA	NA	NA	NA	NA	NA	18	50725943	4.90004e-09	447961	0.000799721	ukb-b-10093	TRUE	reported	igd	2	TRUE
Tense / 'highly strung'	rs814494	C	T	C	T	0.00380937	-0.0454	0.581365	0.534	FALSE	FALSE	FALSE	finn-b-I9_ICH	3	35517986	0.0354	NA	0.1988	Intracerebral haemmorrhage || id:finn-b-I9_ICH	Intracerebral haemmorrhage	Intracerebral haemmorrhage || ||	TRUE	igd	NA	NA	NA	NA	NA	NA	NA	3	35517986	2.80001e-06	447961	0.000813426	ukb-b-10093	TRUE	reported	igd	2	TRUE
Tense / 'highly strung'	rs822852	C	T	C	T	-0.00600789	0.0281	0.113124	0.1107	FALSE	FALSE	FALSE	finn-b-I9_ICH	1	37486654	0.0561	NA	0.6157	Intracerebral haemmorrhage || id:finn-b-I9_ICH	Intracerebral haemmorrhage	Intracerebral haemmorrhage || ||	TRUE	igd	NA	NA	NA	NA	NA	NA	NA	1	37486654	2e-06	447961	0.00126484	ukb-b-10093	TRUE	reported	igd	2	TRUE
Tense / 'highly strung'	rs9340788	A	C	A	C	0.0079989	0.0438	0.058686	0.1143	FALSE	FALSE	FALSE	finn-b-I9_ICH	6	152143389	0.0551	NA	0.4265	Intracerebral haemmorrhage || id:finn-b-I9_ICH	Intracerebral haemmorrhage	Intracerebral haemmorrhage || ||	TRUE	igd	NA	NA	NA	NA	NA	NA	NA	6	152143389	3.09999e-06	447961	0.00171447	ukb-b-10093	TRUE	reported	igd	2	TRUE
Tense / 'highly strung'	rs9370390	G	A	G	A	-0.0054209	0.0407	0.811836	0.7567	FALSE	FALSE	FALSE	finn-b-I9_ICH	6	55013848	0.0412	NA	0.3225	Intracerebral haemmorrhage || id:finn-b-I9_ICH	Intracerebral haemmorrhage	Intracerebral haemmorrhage || ||	TRUE	igd	NA	NA	NA	NA	NA	NA	NA	6	55013848	1.40001e-07	447961	0.00102851	ukb-b-10093	TRUE	reported	igd	2	TRUE
Tense / 'highly strung'	rs9386212	T	G	T	G	-0.00403552	0.0352	0.587756	0.5777	FALSE	FALSE	FALSE	finn-b-I9_ICH	6	148422060	0.0356	NA	0.3227	Intracerebral haemmorrhage || id:finn-b-I9_ICH	Intracerebral haemmorrhage	Intracerebral haemmorrhage || ||	TRUE	igd	NA	NA	NA	NA	NA	NA	NA	6	148422060	7.10003e-07	447961	0.000813856	ukb-b-10093	TRUE	reported	igd	2	TRUE
Tense / 'highly strung'	rs9393716	G	A	G	A	-0.00610551	-0.0456	0.200444	0.1804	FALSE	FALSE	FALSE	finn-b-I9_ICH	6	26376868	0.0468	NA	0.33	Intracerebral haemmorrhage || id:finn-b-I9_ICH	Intracerebral haemmorrhage	Intracerebral haemmorrhage || ||	TRUE	igd	NA	NA	NA	NA	NA	NA	NA	6	26376868	1.2e-09	447961	0.00100337	ukb-b-10093	TRUE	reported	igd	2	TRUE
Tense / 'highly strung'	rs9399613	T	C	T	C	0.00509438	0.0649	0.289138	0.2835	FALSE	FALSE	FALSE	finn-b-I9_ICH	6	147986024	0.0391	NA	0.0971002	Intracerebral haemmorrhage || id:finn-b-I9_ICH	Intracerebral haemmorrhage	Intracerebral haemmorrhage || ||	TRUE	igd	NA	NA	NA	NA	NA	NA	NA	6	147986024	9.29994e-09	447961	0.000886975	ukb-b-10093	TRUE	reported	igd	2	TRUE
Tense / 'highly strung'	rs9527336	A	G	A	G	-0.00529406	-0.0116	0.732971	0.7693	FALSE	FALSE	FALSE	finn-b-I9_ICH	13	55783042	0.0417	NA	0.7815	Intracerebral haemmorrhage || id:finn-b-I9_ICH	Intracerebral haemmorrhage	Intracerebral haemmorrhage || ||	TRUE	igd	NA	NA	NA	NA	NA	NA	NA	13	55783042	4.49997e-09	447961	0.000902846	ukb-b-10093	TRUE	reported	igd	2	TRUE
Tense / 'highly strung'	rs9811546	A	G	A	G	-0.00476941	0.0479	0.317097	0.2614	FALSE	FALSE	FALSE	finn-b-I9_ICH	3	85391672	0.0401	NA	0.2318	Intracerebral haemmorrhage || id:finn-b-I9_ICH	Intracerebral haemmorrhage	Intracerebral haemmorrhage || ||	TRUE	igd	NA	NA	NA	NA	NA	NA	NA	3	85391672	2.90001e-08	447961	0.000859769	ukb-b-10093	TRUE	reported	igd	2	TRUE
Tense / 'highly strung'	rs989317	T	C	T	C	0.00507796	-0.0498	0.207656	0.1633	FALSE	FALSE	FALSE	finn-b-I9_ICH	11	37581686	0.0476	NA	0.2946	Intracerebral haemmorrhage || id:finn-b-I9_ICH	Intracerebral haemmorrhage	Intracerebral haemmorrhage || ||	TRUE	igd	NA	NA	NA	NA	NA	NA	NA	11	37581686	2.69998e-07	447961	0.000987583	ukb-b-10093	TRUE	reported	igd	2	TRUE
Tense / 'highly strung'	rs999483	G	T	G	T	0.00423758	0.0582	0.249154	0.262	FALSE	FALSE	FALSE	finn-b-I9_ICH	9	135301389	0.0407	NA	0.1522	Intracerebral haemmorrhage || id:finn-b-I9_ICH	Intracerebral haemmorrhage	Intracerebral haemmorrhage || ||	TRUE	igd	NA	NA	NA	NA	NA	NA	NA	9	135301389	4.60002e-06	447961	0.00092433	ukb-b-10093	TRUE	reported	igd	2	TRUE
Happiness	rs10424325	A	G	A	G	0.0138369	0.0193	0.235384	0.2419	FALSE	FALSE	FALSE	finn-b-I9_ICH	19	54107465	0.0413	NA	0.6407	Intracerebral haemmorrhage || id:finn-b-I9_ICH	Intracerebral haemmorrhage	Intracerebral haemmorrhage || ||	TRUE	igd	NA	NA	NA	NA	NA	NA	NA	19	54107465	3.79997e-06	152348	0.00299421	ukb-b-4062	TRUE	reported	igd	2	TRUE
Happiness	rs10515033	T	C	T	C	-0.0235869	0.041	0.075969	0.05869	FALSE	FALSE	FALSE	finn-b-I9_ICH	17	51007649	0.0755	NA	0.587	Intracerebral haemmorrhage || id:finn-b-I9_ICH	Intracerebral haemmorrhage	Intracerebral haemmorrhage || ||	TRUE	igd	NA	NA	NA	NA	NA	NA	NA	17	51007649	8e-07	152348	0.00477861	ukb-b-4062	TRUE	reported	igd	2	TRUE
Happiness	rs10983776	C	T	C	T	-0.0118058	-0.0726	0.543986	0.5441	FALSE	FALSE	FALSE	finn-b-I9_ICH	9	120521132	0.0352	NA	0.0393396	Intracerebral haemmorrhage || id:finn-b-I9_ICH	Intracerebral haemmorrhage	Intracerebral haemmorrhage || ||	TRUE	igd	NA	NA	NA	NA	NA	NA	NA	9	120521132	3.79997e-06	152348	0.00255559	ukb-b-4062	TRUE	reported	igd	2	TRUE
Happiness	rs112733482	T	C	T	C	-0.0409943	-0.0595	0.023427	0.01204	FALSE	FALSE	FALSE	finn-b-I9_ICH	6	80306023	0.1634	NA	0.715501	Intracerebral haemmorrhage || id:finn-b-I9_ICH	Intracerebral haemmorrhage	Intracerebral haemmorrhage || ||	TRUE	igd	NA	NA	NA	NA	NA	NA	NA	6	80306023	2.19999e-06	152348	0.00866091	ukb-b-4062	TRUE	reported	igd	2	TRUE
Happiness	rs1156931	G	T	G	T	-0.0124633	-0.0211	0.358993	0.3497	FALSE	FALSE	FALSE	finn-b-I9_ICH	2	164343696	0.0369	NA	0.566601	Intracerebral haemmorrhage || id:finn-b-I9_ICH	Intracerebral haemmorrhage	Intracerebral haemmorrhage || ||	TRUE	igd	NA	NA	NA	NA	NA	NA	NA	2	164343696	2.39999e-06	152348	0.00264483	ukb-b-4062	TRUE	reported	igd	2	TRUE
Happiness	rs116307246	A	G	A	G	0.0449215	-0.021	0.017276	0.01787	FALSE	FALSE	FALSE	finn-b-I9_ICH	1	35379430	0.1344	NA	0.8761	Intracerebral haemmorrhage || id:finn-b-I9_ICH	Intracerebral haemmorrhage	Intracerebral haemmorrhage || ||	TRUE	igd	NA	NA	NA	NA	NA	NA	NA	1	35379430	4.20001e-06	152348	0.0097585	ukb-b-4062	TRUE	reported	igd	2	TRUE
Happiness	rs11653975	T	C	T	C	-0.0139193	-0.0252	0.295708	0.3696	FALSE	FALSE	FALSE	finn-b-I9_ICH	17	75585382	0.0368	NA	0.4942	Intracerebral haemmorrhage || id:finn-b-I9_ICH	Intracerebral haemmorrhage	Intracerebral haemmorrhage || ||	TRUE	igd	NA	NA	NA	NA	NA	NA	NA	17	75585382	7.59994e-07	152348	0.00281432	ukb-b-4062	TRUE	reported	igd	2	TRUE
Happiness	rs117467096	G	A	G	A	0.0488144	0.3665	0.015964	0.003604	FALSE	FALSE	FALSE	finn-b-I9_ICH	10	62191981	0.2988	NA	0.22	Intracerebral haemmorrhage || id:finn-b-I9_ICH	Intracerebral haemmorrhage	Intracerebral haemmorrhage || ||	TRUE	igd	NA	NA	NA	NA	NA	NA	NA	10	62191981	2e-06	152348	0.0102594	ukb-b-4062	TRUE	reported	igd	2	TRUE
Happiness	rs11785287	T	C	T	C	0.0509241	-0.1457	0.014339	0.03368	FALSE	FALSE	FALSE	finn-b-I9_ICH	8	53806207	0.0971	NA	0.1336	Intracerebral haemmorrhage || id:finn-b-I9_ICH	Intracerebral haemmorrhage	Intracerebral haemmorrhage || ||	TRUE	igd	NA	NA	NA	NA	NA	NA	NA	8	53806207	1.89998e-06	152348	0.0106844	ukb-b-4062	TRUE	reported	igd	2	TRUE
Happiness	rs12054959	T	C	T	C	0.0119248	-0.0251	0.49942	0.4659	FALSE	FALSE	FALSE	finn-b-I9_ICH	5	12420779	0.0351	NA	0.474	Intracerebral haemmorrhage || id:finn-b-I9_ICH	Intracerebral haemmorrhage	Intracerebral haemmorrhage || ||	TRUE	igd	NA	NA	NA	NA	NA	NA	NA	5	12420779	2.59998e-06	152348	0.00253827	ukb-b-4062	TRUE	reported	igd	2	TRUE
Happiness	rs12595568	G	T	G	T	0.0135373	-0.014	0.744361	0.7103	FALSE	FALSE	FALSE	finn-b-I9_ICH	15	38990803	0.0389	NA	0.7199	Intracerebral haemmorrhage || id:finn-b-I9_ICH	Intracerebral haemmorrhage	Intracerebral haemmorrhage || ||	TRUE	igd	NA	NA	NA	NA	NA	NA	NA	15	38990803	3.29997e-06	152348	0.00291141	ukb-b-4062	TRUE	reported	igd	2	TRUE
Happiness	rs140713650	C	T	C	T	-0.0301245	-0.0333	0.041535	0.0391	FALSE	FALSE	FALSE	finn-b-I9_ICH	16	67456702	0.0903	NA	0.7123	Intracerebral haemmorrhage || id:finn-b-I9_ICH	Intracerebral haemmorrhage	Intracerebral haemmorrhage || ||	TRUE	igd	NA	NA	NA	NA	NA	NA	NA	16	67456702	2.19999e-06	152348	0.00636546	ukb-b-4062	TRUE	reported	igd	2	TRUE
Happiness	rs148678441	T	C	T	C	-0.0536353	0.2638	0.015052	0.001365	FALSE	FALSE	FALSE	finn-b-I9_ICH	1	105122829	0.523	NA	0.613901	Intracerebral haemmorrhage || id:finn-b-I9_ICH	Intracerebral haemmorrhage	Intracerebral haemmorrhage || ||	TRUE	igd	NA	NA	NA	NA	NA	NA	NA	1	105122829	1.5e-06	152348	0.0111606	ukb-b-4062	TRUE	reported	igd	2	TRUE
Happiness	rs148805314	T	C	T	C	-0.0432311	0.0401	0.023862	0.02113	FALSE	FALSE	FALSE	finn-b-I9_ICH	17	18876566	0.1207	NA	0.74	Intracerebral haemmorrhage || id:finn-b-I9_ICH	Intracerebral haemmorrhage	Intracerebral haemmorrhage || ||	TRUE	igd	NA	NA	NA	NA	NA	NA	NA	17	18876566	4.90004e-07	152348	0.00859259	ukb-b-4062	TRUE	reported	igd	2	TRUE
Happiness	rs1558413	G	C	G	C	0.0143811	0.0093	0.327107	0.3396	FALSE	TRUE	FALSE	finn-b-I9_ICH	7	69504764	0.0372	NA	0.8017	Intracerebral haemmorrhage || id:finn-b-I9_ICH	Intracerebral haemmorrhage	Intracerebral haemmorrhage || ||	TRUE	igd	NA	NA	NA	NA	NA	NA	NA	7	69504764	1.09999e-07	152348	0.00270635	ukb-b-4062	TRUE	reported	igd	2	TRUE
Happiness	rs16003	T	C	T	C	0.0126335	0.0726	0.51676	0.5125	FALSE	FALSE	FALSE	finn-b-I9_ICH	19	13616693	0.0355	NA	0.0409798	Intracerebral haemmorrhage || id:finn-b-I9_ICH	Intracerebral haemmorrhage	Intracerebral haemmorrhage || ||	TRUE	igd	NA	NA	NA	NA	NA	NA	NA	19	13616693	1.2e-06	152348	0.00259762	ukb-b-4062	TRUE	reported	igd	2	TRUE
Happiness	rs17123011	G	C	G	C	0.0299536	0.0244	0.043876	0.09742	FALSE	TRUE	FALSE	finn-b-I9_ICH	12	48835835	0.0592	NA	0.6798	Intracerebral haemmorrhage || id:finn-b-I9_ICH	Intracerebral haemmorrhage	Intracerebral haemmorrhage || ||	TRUE	igd	NA	NA	NA	NA	NA	NA	NA	12	48835835	1.5e-06	152348	0.00621992	ukb-b-4062	TRUE	reported	igd	2	TRUE
Happiness	rs17204309	G	C	G	C	0.033043	-0.0176	0.042167	0.03767	FALSE	TRUE	FALSE	finn-b-I9_ICH	18	67196020	0.0926	NA	0.8493	Intracerebral haemmorrhage || id:finn-b-I9_ICH	Intracerebral haemmorrhage	Intracerebral haemmorrhage || ||	TRUE	igd	NA	NA	NA	NA	NA	NA	NA	18	67196020	2.69998e-07	152348	0.00642413	ukb-b-4062	TRUE	reported	igd	2	TRUE
Happiness	rs17463514	C	T	C	T	0.0160753	-0.0443	0.158996	0.1468	FALSE	FALSE	FALSE	finn-b-I9_ICH	6	128951005	0.0498	NA	0.3732	Intracerebral haemmorrhage || id:finn-b-I9_ICH	Intracerebral haemmorrhage	Intracerebral haemmorrhage || ||	TRUE	igd	NA	NA	NA	NA	NA	NA	NA	6	128951005	4.20001e-06	152348	0.00349248	ukb-b-4062	TRUE	reported	igd	2	TRUE
Happiness	rs17687579	G	A	G	A	0.0518257	0.0847	0.01372	0.04785	FALSE	FALSE	FALSE	finn-b-I9_ICH	4	144286963	0.0828	NA	0.3064	Intracerebral haemmorrhage || id:finn-b-I9_ICH	Intracerebral haemmorrhage	Intracerebral haemmorrhage || ||	TRUE	igd	NA	NA	NA	NA	NA	NA	NA	4	144286963	4.09996e-06	152348	0.0112456	ukb-b-4062	TRUE	reported	igd	2	TRUE
Happiness	rs2080364	A	G	A	G	0.0132157	0.01	0.524462	0.5459	FALSE	FALSE	FALSE	finn-b-I9_ICH	16	53376459	0.0359	NA	0.781	Intracerebral haemmorrhage || id:finn-b-I9_ICH	Intracerebral haemmorrhage	Intracerebral haemmorrhage || ||	TRUE	igd	NA	NA	NA	NA	NA	NA	NA	16	53376459	8.19993e-07	152348	0.00268022	ukb-b-4062	TRUE	reported	igd	2	TRUE
Happiness	rs2786185	A	G	A	G	-0.0134291	0.0149	0.443031	0.4983	FALSE	FALSE	FALSE	finn-b-I9_ICH	6	147595554	0.0353	NA	0.6728	Intracerebral haemmorrhage || id:finn-b-I9_ICH	Intracerebral haemmorrhage	Intracerebral haemmorrhage || ||	TRUE	igd	NA	NA	NA	NA	NA	NA	NA	6	147595554	1.5e-07	152348	0.00255931	ukb-b-4062	TRUE	reported	igd	2	TRUE
Happiness	rs3982999	G	A	G	A	0.0123653	0.0196	0.482279	0.4322	FALSE	FALSE	FALSE	finn-b-I9_ICH	2	71248167	0.036	NA	0.5861	Intracerebral haemmorrhage || id:finn-b-I9_ICH	Intracerebral haemmorrhage	Intracerebral haemmorrhage || ||	TRUE	igd	NA	NA	NA	NA	NA	NA	NA	2	71248167	1.89998e-06	152348	0.00259298	ukb-b-4062	TRUE	reported	igd	2	TRUE
Happiness	rs4239724	G	A	G	A	-0.0143402	0.0584	0.217223	0.1913	FALSE	FALSE	FALSE	finn-b-I9_ICH	20	17445078	0.045	NA	0.194	Intracerebral haemmorrhage || id:finn-b-I9_ICH	Intracerebral haemmorrhage	Intracerebral haemmorrhage || ||	TRUE	igd	NA	NA	NA	NA	NA	NA	NA	20	17445078	3.59998e-06	152348	0.00309349	ukb-b-4062	TRUE	reported	igd	2	TRUE
Happiness	rs4555399	A	G	A	G	-0.0121729	-0.0158	0.37423	0.354	FALSE	FALSE	FALSE	finn-b-I9_ICH	20	45837896	0.0368	NA	0.669	Intracerebral haemmorrhage || id:finn-b-I9_ICH	Intracerebral haemmorrhage	Intracerebral haemmorrhage || ||	TRUE	igd	NA	NA	NA	NA	NA	NA	NA	20	45837896	3.69999e-06	152348	0.00263015	ukb-b-4062	TRUE	reported	igd	2	TRUE
Happiness	rs4728149	G	A	G	A	0.0290536	-0.0282	0.043496	0.09302	FALSE	FALSE	FALSE	finn-b-I9_ICH	7	128731693	0.0605	NA	0.6411	Intracerebral haemmorrhage || id:finn-b-I9_ICH	Intracerebral haemmorrhage	Intracerebral haemmorrhage || ||	TRUE	igd	NA	NA	NA	NA	NA	NA	NA	7	128731693	3.2e-06	152348	0.00623457	ukb-b-4062	TRUE	reported	igd	2	TRUE
Happiness	rs4943320	A	C	A	C	-0.016024	-0.0809	0.162924	0.1349	FALSE	FALSE	FALSE	finn-b-I9_ICH	13	31474177	0.0517	NA	0.1178	Intracerebral haemmorrhage || id:finn-b-I9_ICH	Intracerebral haemmorrhage	Intracerebral haemmorrhage || ||	TRUE	igd	NA	NA	NA	NA	NA	NA	NA	13	31474177	3.50002e-06	152348	0.00345539	ukb-b-4062	TRUE	reported	igd	2	TRUE
Happiness	rs582994	A	G	A	G	-0.0126747	-0.0081	0.596506	0.5734	FALSE	FALSE	FALSE	finn-b-I9_ICH	11	88633985	0.0355	NA	0.8198	Intracerebral haemmorrhage || id:finn-b-I9_ICH	Intracerebral haemmorrhage	Intracerebral haemmorrhage || ||	TRUE	igd	NA	NA	NA	NA	NA	NA	NA	11	88633985	9.69996e-07	152348	0.00258806	ukb-b-4062	TRUE	reported	igd	2	TRUE
Happiness	rs6095391	A	G	A	G	0.0144471	0.046	0.245059	0.2239	FALSE	FALSE	FALSE	finn-b-I9_ICH	20	47618835	0.042	NA	0.2741	Intracerebral haemmorrhage || id:finn-b-I9_ICH	Intracerebral haemmorrhage	Intracerebral haemmorrhage || ||	TRUE	igd	NA	NA	NA	NA	NA	NA	NA	20	47618835	9.49992e-07	152348	0.00294746	ukb-b-4062	TRUE	reported	igd	2	TRUE
Happiness	rs62152899	T	C	T	C	0.0486358	0.4015	0.017839	0.004661	FALSE	FALSE	FALSE	finn-b-I9_ICH	2	97561554	0.2585	NA	0.1203	Intracerebral haemmorrhage || id:finn-b-I9_ICH	Intracerebral haemmorrhage	Intracerebral haemmorrhage || ||	TRUE	igd	NA	NA	NA	NA	NA	NA	NA	2	97561554	1.40001e-06	152348	0.0100808	ukb-b-4062	TRUE	reported	igd	2	TRUE
Happiness	rs62341791	C	T	C	T	-0.0145727	0.044	0.222407	0.2778	FALSE	FALSE	FALSE	finn-b-I9_ICH	5	7285985	0.0393	NA	0.2622	Intracerebral haemmorrhage || id:finn-b-I9_ICH	Intracerebral haemmorrhage	Intracerebral haemmorrhage || ||	TRUE	igd	NA	NA	NA	NA	NA	NA	NA	5	7285985	2e-06	152348	0.00306399	ukb-b-4062	TRUE	reported	igd	2	TRUE
Happiness	rs672457	A	G	A	G	0.0127409	-0.0216	0.592151	0.5171	FALSE	FALSE	FALSE	finn-b-I9_ICH	6	139836562	0.0352	NA	0.5399	Intracerebral haemmorrhage || id:finn-b-I9_ICH	Intracerebral haemmorrhage	Intracerebral haemmorrhage || ||	TRUE	igd	NA	NA	NA	NA	NA	NA	NA	6	139836562	7.90005e-07	152348	0.00258071	ukb-b-4062	TRUE	reported	igd	2	TRUE
Happiness	rs685031	A	G	A	G	0.0156196	-0.0061	0.619496	0.6459	FALSE	FALSE	FALSE	finn-b-I9_ICH	6	31881731	0.0403	NA	0.8787	Intracerebral haemmorrhage || id:finn-b-I9_ICH	Intracerebral haemmorrhage	Intracerebral haemmorrhage || ||	TRUE	igd	NA	NA	NA	NA	NA	NA	NA	6	31881731	2e-09	152348	0.00260529	ukb-b-4062	TRUE	reported	igd	2	TRUE
Happiness	rs6869409	T	A	T	A	-0.0278661	0.0405	0.951768	0.9271	FALSE	TRUE	FALSE	finn-b-I9_ICH	5	123787475	0.068	NA	0.5509	Intracerebral haemmorrhage || id:finn-b-I9_ICH	Intracerebral haemmorrhage	Intracerebral haemmorrhage || ||	TRUE	igd	NA	NA	NA	NA	NA	NA	NA	5	123787475	3.09999e-06	152348	0.00597285	ukb-b-4062	TRUE	reported	igd	2	TRUE
Happiness	rs708853	T	C	T	C	-0.0139302	0.0518	0.378611	0.4372	FALSE	FALSE	FALSE	finn-b-I9_ICH	12	117989448	0.0355	NA	0.1445	Intracerebral haemmorrhage || id:finn-b-I9_ICH	Intracerebral haemmorrhage	Intracerebral haemmorrhage || ||	TRUE	igd	NA	NA	NA	NA	NA	NA	NA	12	117989448	1.29999e-07	152348	0.00264177	ukb-b-4062	TRUE	reported	igd	2	TRUE
Happiness	rs72758424	G	A	G	A	-0.0590856	0.0064	0.014172	0.02057	FALSE	FALSE	FALSE	finn-b-I9_ICH	9	98618976	0.1238	NA	0.9585	Intracerebral haemmorrhage || id:finn-b-I9_ICH	Intracerebral haemmorrhage	Intracerebral haemmorrhage || ||	TRUE	igd	NA	NA	NA	NA	NA	NA	NA	9	98618976	7.39997e-08	152348	0.0109822	ukb-b-4062	TRUE	reported	igd	2	TRUE
Happiness	rs72769685	T	C	T	C	0.0455687	-0.018	0.020568	0.008186	FALSE	FALSE	FALSE	finn-b-I9_ICH	2	13331180	0.2026	NA	0.9292	Intracerebral haemmorrhage || id:finn-b-I9_ICH	Intracerebral haemmorrhage	Intracerebral haemmorrhage || ||	TRUE	igd	NA	NA	NA	NA	NA	NA	NA	2	13331180	3.40001e-07	152348	0.00893619	ukb-b-4062	TRUE	reported	igd	2	TRUE
Happiness	rs72788203	C	T	C	T	-0.043217	-0.0849	0.019453	0.01108	FALSE	FALSE	FALSE	finn-b-I9_ICH	5	111315590	0.1679	NA	0.6132	Intracerebral haemmorrhage || id:finn-b-I9_ICH	Intracerebral haemmorrhage	Intracerebral haemmorrhage || ||	TRUE	igd	NA	NA	NA	NA	NA	NA	NA	5	111315590	2.99999e-06	152348	0.00925027	ukb-b-4062	TRUE	reported	igd	2	TRUE
Happiness	rs72929133	T	A	T	A	-0.0211468	-0.0141	0.097675	0.07534	FALSE	TRUE	FALSE	finn-b-I9_ICH	11	61163302	0.0669	NA	0.8332	Intracerebral haemmorrhage || id:finn-b-I9_ICH	Intracerebral haemmorrhage	Intracerebral haemmorrhage || ||	TRUE	igd	NA	NA	NA	NA	NA	NA	NA	11	61163302	8.60003e-07	152348	0.0042964	ukb-b-4062	TRUE	reported	igd	2	TRUE
Happiness	rs73782918	T	C	T	C	0.0227791	-0.0458	0.074173	0.06145	FALSE	FALSE	FALSE	finn-b-I9_ICH	6	161928546	0.0724	NA	0.5269	Intracerebral haemmorrhage || id:finn-b-I9_ICH	Intracerebral haemmorrhage	Intracerebral haemmorrhage || ||	TRUE	igd	NA	NA	NA	NA	NA	NA	NA	6	161928546	3.29997e-06	152348	0.00490015	ukb-b-4062	TRUE	reported	igd	2	TRUE
Happiness	rs7816044	T	A	T	A	-0.017285	0.0316	0.848613	0.8418	FALSE	TRUE	FALSE	finn-b-I9_ICH	8	4629684	0.0485	NA	0.514	Intracerebral haemmorrhage || id:finn-b-I9_ICH	Intracerebral haemmorrhage	Intracerebral haemmorrhage || ||	TRUE	igd	NA	NA	NA	NA	NA	NA	NA	8	4629684	1.2e-06	152348	0.00356356	ukb-b-4062	TRUE	reported	igd	2	TRUE
Happiness	rs79354855	C	T	C	T	-0.0371587	-0.0861	0.030122	0.008699	FALSE	FALSE	FALSE	finn-b-I9_ICH	9	140719479	0.1949	NA	0.6586	Intracerebral haemmorrhage || id:finn-b-I9_ICH	Intracerebral haemmorrhage	Intracerebral haemmorrhage || ||	TRUE	igd	NA	NA	NA	NA	NA	NA	NA	9	140719479	7.29995e-07	152348	0.00750059	ukb-b-4062	TRUE	reported	igd	2	TRUE
Happiness	rs8037976	A	G	A	G	0.0145408	0.0378	0.238403	0.1998	FALSE	FALSE	FALSE	finn-b-I9_ICH	15	61643737	0.0442	NA	0.3924	Intracerebral haemmorrhage || id:finn-b-I9_ICH	Intracerebral haemmorrhage	Intracerebral haemmorrhage || ||	TRUE	igd	NA	NA	NA	NA	NA	NA	NA	15	61643737	1.29999e-06	152348	0.00300807	ukb-b-4062	TRUE	reported	igd	2	TRUE
Happiness	rs8124419	G	A	G	A	-0.0118184	0.056	0.417396	0.4023	FALSE	FALSE	FALSE	finn-b-I9_ICH	20	11978228	0.036	NA	0.1203	Intracerebral haemmorrhage || id:finn-b-I9_ICH	Intracerebral haemmorrhage	Intracerebral haemmorrhage || ||	TRUE	igd	NA	NA	NA	NA	NA	NA	NA	20	11978228	4.79999e-06	152348	0.00258363	ukb-b-4062	TRUE	reported	igd	2	TRUE
Happiness	rs887944	C	T	C	T	0.0152575	0.0075	0.776484	0.7927	FALSE	FALSE	FALSE	finn-b-I9_ICH	2	49233510	0.0433	NA	0.8619	Intracerebral haemmorrhage || id:finn-b-I9_ICH	Intracerebral haemmorrhage	Intracerebral haemmorrhage || ||	TRUE	igd	NA	NA	NA	NA	NA	NA	NA	2	49233510	5.30005e-07	152348	0.00304281	ukb-b-4062	TRUE	reported	igd	2	TRUE
